# Supplementary material
Source: Elsevier journal article supplement (https://www.sciencedirect.com/science/article/pii/S0300289621001150)
Supplement: mmc1 [file S0300289621001150:mmc1.pdf]

# 1. SUEÑO EN GENERAL

**EDITOR:** Josep M.<sup>a</sup> Montserrat. Unidad Multidisciplinar de Patología del Sueño y VNID, Servei Pneumologia, Institut Clínic Respiratori, Hospital Clínic, Barcelona, España; Universidad de Barcelona, Barcelona, Centro de Investigación Biomédica en Red de Enfermedades Respiratorias (CIBERES), Madrid, España.

**Autores:**

Isaac Almendros. Unitat de Biofísica i Bioenginyeria, Facultat de Medicina i Ciències de la Salut, Universitat de Barcelona, Barcelona, España; CIBER de Enfermedades Respiratorias, Madrid, España; Institut d'Investigacions Biomediques August Pi Sunyer, Barcelona, España.

Carles Gaig. Servicio de Neurología, Unidad Multidisciplinar de Sueño, Hospital Clínic de Barcelona. España.

## Regulación, funciones, aspectos biológicos generales y prevalencia. Los aspectos biológicos relacionados con el sueño.

### 1.1. MECANISMOS DE REGULACIÓN NEUROLÓGICA Y ASPECTOS BIOLÓGICOS DURANTE EL SUEÑO

El sueño es un fenómeno fisiológico y conductual en el que se produce una disminución reversible del nivel de conciencia. En condiciones normales el sueño ocurre periódicamente, cada noche, y está determinado principalmente por dos mecanismos: el proceso homeostático y el ritmo circadiano. El primero depende del efecto prolongado de la vigilia y en él, como consecuencia de la alta actividad metabólica cerebral, se acumulan mediadores como la adenosina que generan progresivamente una mayor necesidad o presión de sueño. El segundo mecanismo está relacionado con la oscilación del marcapasos circadiano localizado en el hipotálamo, en el núcleo supraquiasmático. Ambos mecanismos actúan directamente sobre las áreas cerebrales relacionadas con la regulación de la vigilia y el sueño, que incluyen principalmente núcleos colinérgicos (acetilcolina), y el sistema reticular activador ascendente monoaminérgico del tronco del encéfalo (dopamina, serotonina, noradrenalina y la histamina), ambos promotores de la vigilia, y el hipotálamo con sus áreas anteriores gabaérgicas (GABA), que son inductoras del sueño, y las áreas posteriores productoras de hipocretina/orexina, que promueven y estabilizan la vigilia<sup>1</sup> (Tabla 1).

**Tabla 1.** Actividad de los mediadores cerebrales de varios centros/núcleos en relación con los estados de vigilia y sueño

|                                                                                                | NEUROTRANSMISORES   | VIGILIA                                                             | SUEÑO NO-REM | SUEÑO REM |
|------------------------------------------------------------------------------------------------|---------------------|---------------------------------------------------------------------|--------------|-----------|
| <div> Noradrenalina<br/> Serotonina<br/> Histamina<br/> Dopamina </div>                        | Acetilcolina        | ↑ ↑                                                                 | —            | ↑ ↑       |
|                                                                                                | Monoaminas          | ↑ ↑                                                                 | ↑            | —         |
|                                                                                                | Hipocretina/orexina | ↑ ↑                                                                 | —            | —         |
|                                                                                                | MHC (melanina)      | —                                                                   | —            | ↑ ↑       |
|                                                                                                | GABA                | —                                                                   | ↑ ↑          | ↑ ↑       |
| La farmacología del sistema nervioso tiene una relación con los mediadores citados en la tabla |                     |                                                                     |              |           |
| <b>ANTIDEPRESIVOS:</b>                                                                         |                     | Aumento de los niveles de serotonina = <i>Suprimen el sueño REM</i> |              |           |
| <b>ESTIMULANTES:</b>                                                                           |                     | Incremento de la dopamina/noradrenalina = <i>Activan la vigilia</i> |              |           |
| <b>INDUCTORES DEL SUEÑO:</b>                                                                   |                     | Aumento del GABA = <i>Promueven el sueño</i>                        |              |           |
| <b>ANTIISTAMÍNICOS:</b>                                                                        |                     | Bloquean los receptores de histamina = <i>Promueven el sueño</i>    |              |           |
| <b>ANTIPSICÓTICOS:</b>                                                                         |                     | Bloquean los receptores de la dopamina = <i>Promueven el sueño</i>  |              |           |

La transición entre la vigilia y el sueño (y también entre el sueño no-REM y REM) se produce por la activación de los núcleos promotores de cada uno de estos estados junto con la inhibición simultánea de los núcleos que promueven el estado opuesto. Por ejemplo, la activación de los núcleos colinérgicos y el sistema reticular activador ascendente monoaminérgico inhibirán las áreas gabaérgicas del hipotálamo y darán lugar a la vigilia. Esta inhibición recíproca entre las áreas promotoras de la vigilia y el sueño (o el sueño no-REM y REM) se ha bautizado como mecanismo en *flip-flop* ("circuito" o "interruptor" basculante) (Figura 1)

**Figura 1.** *Flip-flop* en vigilia y sueño. Ach: acetilcolina; DA: dopamina; GABA: ácido γ-aminobutírico; 5HT: serotonina; Hcrt: hipocretina; Hist: histamina; NA: noradrenalina<sup>2</sup>.

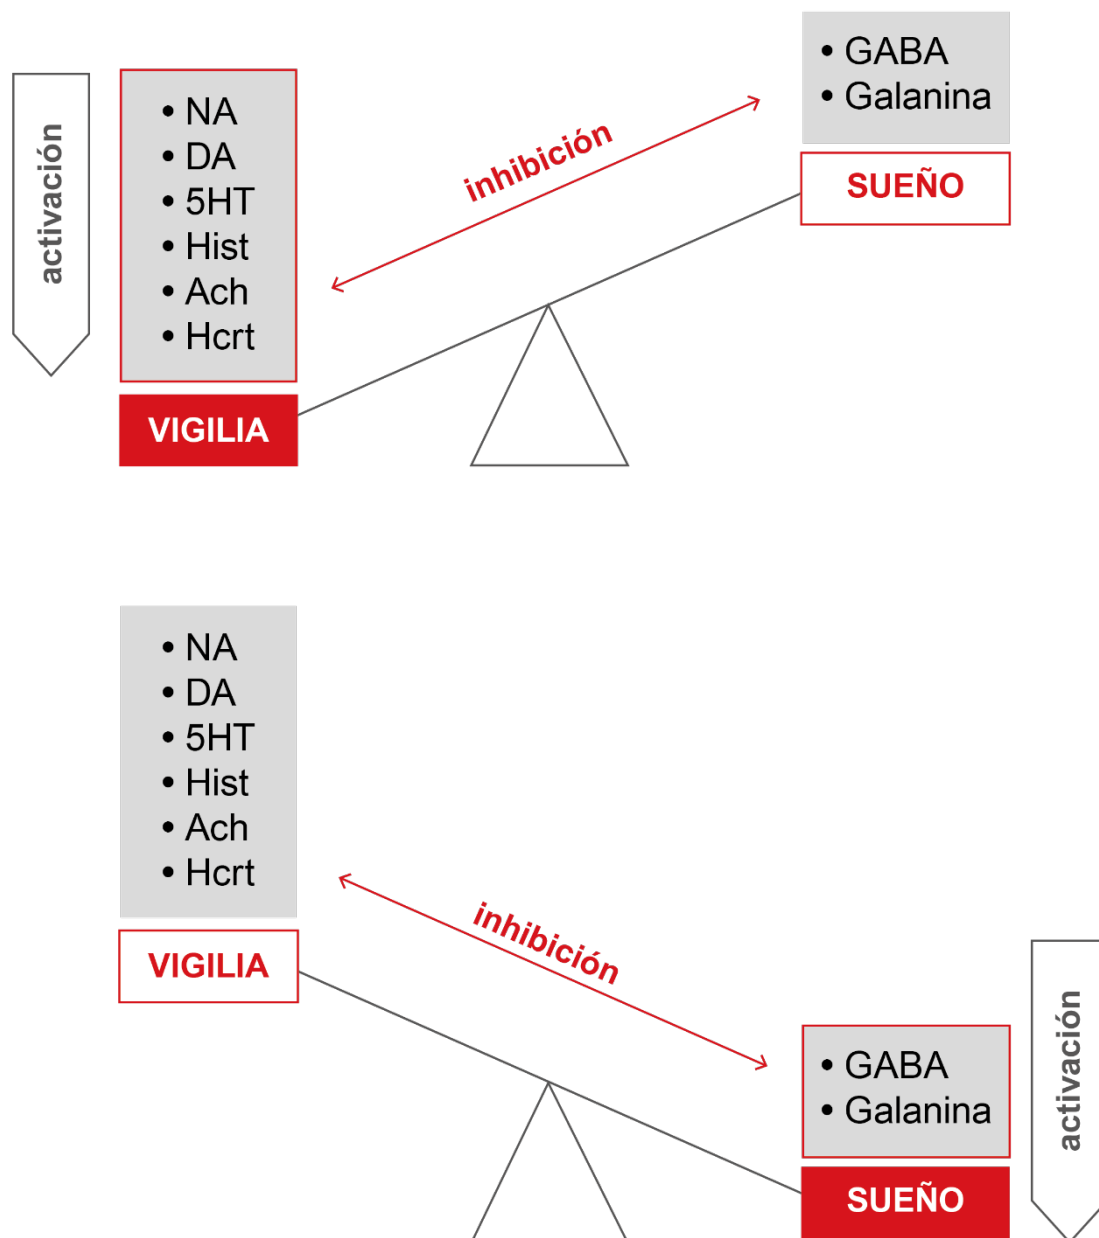

En resumen, durante el día se acumularán sustancias somnógenas que activarán el proceso homeostático que, junto con el ritmo circadiano, favorecerán al llegar la noche la activación de áreas del hipotálamo inductoras del sueño, que a su vez inhibirán las áreas cerebrales promotoras de la vigilia, apareciendo el sueño no-REM. Posteriormente, la activación durante el sueño de núcleos colinérgicos y glutaminérgicos del tronco del encéfalo darán lugar a la fase REM.

Si bien la finalidad y los motivos exactos por los que necesitamos dormir son aún desconocidos, estos deben ser muy relevantes, pues el sueño es un fenómeno fisiológico muy conservado biológicamente que ocurre en todos los animales y en los humanos ocupa una tercera parte de la vida. Actualmente sabemos que mientras dormimos sucede toda una serie de importantes cambios fisiológicos que involucran prácticamente a todos los sistemas de nuestro organismo (**Tabla 2**). Estos cambios fisiológicos pueden variar dependiendo del tipo de sueño, ya sea en fase no-REM o REM, o bien seguir un patrón circadiano cuando tienen un ritmo aproximado de 1 día (de *circa*, «alrededor de») y se modifican a lo largo de la vigilia diurna y el sueño nocturno bajo el control del marcapasos circadiano hipotalámico<sup>3</sup>. Un buen ejemplo es la temperatura corporal, cuyo ritmo circadiano es muy estable, de alrededor de 24 h, con una temperatura máxima al final de la tarde y una mínima en las primeras horas de la madrugada, estando el período de menor temperatura corporal sincronizado con el sueño nocturno. Otros cambios fisiológicos estarán mediados por el sistema nervioso autónomo, dado que tanto durante el sueño no-REM como en el REM hay una activación del sistema nervioso parasimpático a la que se añadirá durante la fase REM una inhibición del sistema simpático. Como consecuencia de todo ello, por ejemplo, la presión arterial disminuye durante el sueño nocturno, aproximadamente el 10% menos que en la vigilia diurna (fenómeno conocido como *dipping* o de “hundimiento” de la presión arterial)<sup>4</sup>. Otras funciones relevantes del sueño son a nivel neurológico, donde el sueño parece tener una función de *clearance* o “lavado” de sustancias neurotóxicas generadas por el cerebro durante la vigilia, así como en la consolidación del aprendizaje y la memoria al potenciar la formación de algunas sinapsis generadas durante la vigilia mientras se eliminan aquellas que son menos relevantes<sup>5,6</sup>.

**Tabla 2.** Algunos cambios fisiológicos relevantes que ocurren durante el sueño.

| SISTEMA/FUNCIÓN             | MODIFICACIONES FISOLÓGICAS/RITMO CIRCADIANO                                                                                          |
|-----------------------------|--------------------------------------------------------------------------------------------------------------------------------------|
| <b>Temperatura corporal</b> | Reducción al inicio del sueño con un mínimo a las 5 a.m. (máximo a las 8-9 p.m.)                                                     |
| <b>Cardiovascular</b>       | Disminución de la presión arterial durante el sueño nocturno de un 10% en relación con la tensión arterial diurna ( <i>dipping</i> ) |
| <b>Gastrointestinal</b>     | Reducción nocturna de la secreción gástrica basal y motilidad gastrointestinal (nadir: 5-11 a.m.)                                    |
| <b>Renal</b>                | Reducción nocturna en el filtrado glomerular y menor producción de orina                                                             |

|                                                     |                                                                                                              |                                                            |
|-----------------------------------------------------|--------------------------------------------------------------------------------------------------------------|------------------------------------------------------------|
| <b>Endocrinológico</b>                              |                                                                                                              |                                                            |
| ACTH y cortisol                                     | Aumento progresivo durante el sueño y pico a las 8.00 a.m.                                                   |                                                            |
| Gonadotropinas                                      | Incremento durante el sueño (en la pubertad)                                                                 |                                                            |
| TSH y hormonas tiroideas                            | Incremento de niveles vespertinos, pico antes del inicio del sueño y disminución progresiva durante el sueño |                                                            |
| Hormona del crecimiento                             | Incremento en la secreción durante el sueño, sobre todo en la fase N3. Pico en el primer período de fase N3  |                                                            |
| Insulina                                            | Mayor secreción diurna                                                                                       |                                                            |
| Prolactina                                          | Aumento de la producción durante el sueño, pico a las 5-7 a.m.                                               |                                                            |
| Melatonina                                          | Incremento al anochecer, con pico a las 3-5 a.m.                                                             |                                                            |
|                                                     | <b>CON LA FASE DE SUEÑO</b>                                                                                  |                                                            |
|                                                     | <b>Sueño NREM<br/>(en relación con la vigilia)</b>                                                           | <b>Sueño REM<br/>(en relación con al<br/>sueño no-REM)</b> |
| <b>Nervioso autónomo</b>                            | Activación parasimpática                                                                                     | Activación parasimpática<br>e inhibición simpática         |
| <b>Cardiovascular</b>                               |                                                                                                              |                                                            |
| Frecuencia cardíaca                                 | Disminución                                                                                                  | Fluctuación                                                |
| Resistencia periférica                              | Disminución (leve)                                                                                           | Fluctuación                                                |
| Gasto cardíaco                                      | Disminución                                                                                                  | Fluctuación                                                |
| Presión arterial                                    | Disminución                                                                                                  | Fluctuación                                                |
| Circulación coronaria                               | Disminución                                                                                                  | Aumento                                                    |
| Circulación cerebral                                | Disminución                                                                                                  | Aumento en ciertas<br>áreas                                |
| <b>Respiratorio</b>                                 |                                                                                                              |                                                            |
| Control conductual de la ventilación                | Disminuido                                                                                                   | Aumentado                                                  |
| Dependencia a mecanorreceptores y quimiorreceptores | Mayor                                                                                                        | Menor                                                      |

|                                                  |           |                                           |
|--------------------------------------------------|-----------|-------------------------------------------|
| Sensibilidad a la hipoxia e hipercapnia          | Menor     | Menor                                     |
| Control y tono muscular de la vía aérea superior | Reducidos | Muy reducidos                             |
| <b>Genital</b>                                   | -         | Erecciones peneanas y tumescencia vaginal |

Durante el sueño ocurren importantes cambios en la fisiología de la respiración. En el sueño no-REM, el control conductual de la respiración desaparece y los centros respiratorios del tronco cerebral dependen en mayor grado de los mecanorreceptores y quimiorreceptores centrales y periféricos, siendo la sensibilidad a la hipoxia e hipercapnia menor y reduciéndose el tono muscular y control de la vía aérea superior. Durante el sueño REM el control conductual se incrementa, siendo la dependencia a mecanorreceptores y quimiorreceptores menor, si bien la atonía y colapsabilidad de la vía respiratoria se incrementa aún más<sup>7</sup>. Todos estos cambios fisiológicos en la respiración hacen que la ventilación sea especialmente más vulnerable durante el sueño.

La **figura 2** muestra un resumen global de todo el proceso fisiológico y biológico. La vía aérea superior de los pacientes con apnea obstructiva del sueño tiende a colapsarse durante las horas de sueño, provocando la oclusión total o parcial de la vía aérea. El cese de la respiración del paciente ocurre hasta que se produce un microdespertar que reactiva la musculatura y se logra la reapertura de la vía aérea. El episodio apneico aparece cuando estos factores que tienden a cerrar el lumen de la vía aérea no pueden contrarrestarse con la capacidad muscular y los centros respiratorios que la mantienen abierta.

**Figura 2.** Resumen global del proceso fisiológico y biológico producido durante la apnea obstructiva del sueño. Como puede observarse en la parte superior izquierda de la figura, la obstrucción de la vía aérea superior (VAS) es consecuencia de un desequilibrio entre las fuerzas que tienden a mantenerla abierta (actividad de su musculatura) frente a aquellas que tienden a cerrarla (factores anatómicos). Este desequilibrio da lugar a un aumento de la colapsabilidad de la VAS, produciéndose el episodio respiratorio (apnea o hipopnea). Se estima que un 19% de la población general tiene un número de apneas-hipopneas por hora superior al 10<sup>11</sup>. Estos episodios conllevan una serie de cambios fisiológicos (hipoxia, despertares transitorios y cambios de presión intratorácica), así como una serie de cambios biológicos (inflamación, estrés oxidativo, entre otros). Dependiendo de los fenómenos de adaptación individuales, estos episodios dan lugar a patología secundaria en forma de síntomas o constituyen factores de riesgo para el desarrollo de diversas entidades (Hipertensión arterial (HTA), entre otras). Diversos factores genéricos modulan la pre-disposición a estas consecuencias.

IAH: Índice de Apnea Hipopnea. HTA: hipertensión arterial. AOS: Apnea Obstruktiva del Sueño.

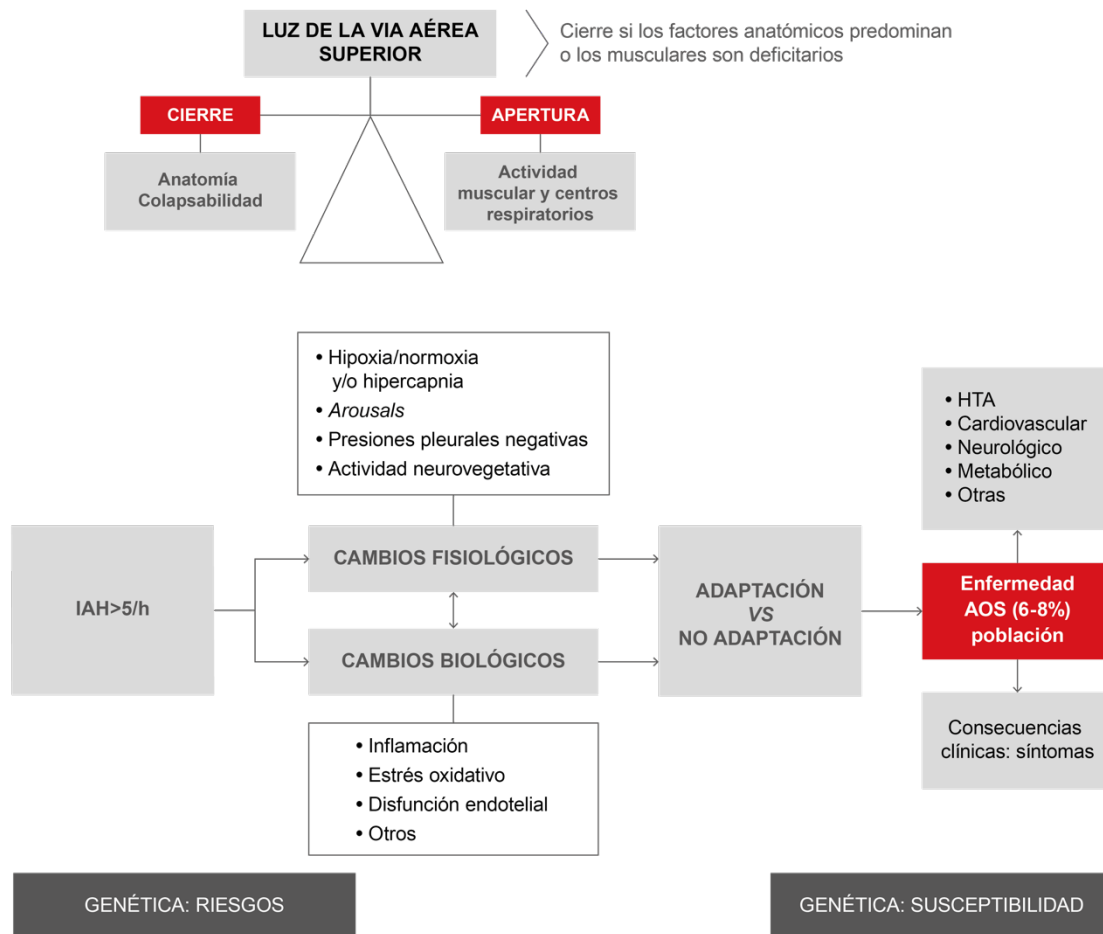

En la actualidad existen estudios experimentales enfocados en la fisiología de la vía aérea y la estimulación neuromuscular que están facilitando nuevas perspectivas terapéuticas<sup>8</sup> y que podrían ayudar a mejorar los bajos porcentajes de cumplimiento con presión positiva continua en las vías respiratorias. Los episodios apneicos recurrentes dan lugar a hipoxia intermitente y fragmentación del sueño, entre otras alteraciones, que inducen estrés oxidativo, activación simpática e inflamación a nivel sistémico y tisular<sup>9,10</sup>. En los casos menos graves de este trastorno respiratorio, con desaturaciones de oxígeno leves y de menor frecuencia, existen mecanismos compensatorios que logran contrarrestar sus efectos nocivos.

Así, parecen participar diversos tipos de células madre progenitoras o mesenquimatosas, entre otros factores que podrían incluso conferir cierta protección a algunos tipos de enfermedades cardiovasculares y cognitivas<sup>9</sup>. Sin embargo, ello no acontece habitualmente en los casos graves, y de ahí la patología secundaria, como muestra la figura 2<sup>9</sup>. Nuestras líneas de investigación recientes son la del microbioma de animales sometidos a hipoxia intermitente y fragmentación del sueño<sup>12</sup> y, por otro lado, la secreción de microvesículas y exosomas<sup>13</sup>. A nivel clínico también existen avances importantes en la identificación de fenotipos genéticos<sup>14</sup>. En definitiva, los

avances a partir de estudios básicos y clínicos van a permitir el desarrollo y establecimiento de terapias personalizadas.



## BIBLIOGRAFÍA:

1. Scammell TE, Arrigoni E, Lipton JO. Neural Circuitry of Wakefulness and Sleep. *Neuron* 2017;93(4):747-65.
2. España RA, Scammell TE. Sleep neurobiology from a clinical perspective. *Sleep* 2011;34(7):845-58.
3. Potter GD, Skene DJ, Arendt J, Cade JE, Grant PJ, Hardie LJ. Circadian Rhythm and Sleep Disruption: Causes, Metabolic Consequences, and Countermeasures. *Endocr Rev* 2016;37:584-608.
4. Fink AM, Bronas UG, Calik MW. Autonomic regulation during sleep and wakefulness: a review with implications for defining the pathophysiology of neurological disorders. *Clin Auton Res* 2018;28:509-18.
5. Xie L, Kang H, Xu Q, Chen MJ, Liao Y, Thiyagarajan M, et al. Sleep drives metabolite clearance from the adult brain. *Science* 2013;342:373-7.
6. Rasch B, Born J. About sleep's role in memory. *Physiol Rev* 2013;93:681-766.
7. Waters T, Mehra R. Clinical neurophysiology of apnea. *Handb Clin Neurol* 2019;161:345-52.
8. Kompelli AR, Ni JS, Nguyen SA, Lentsch EJ, Neskey DM, Meyer TA. The outcomes of hypoglossal nerve stimulation in the management of OSA: A systematic review and meta-analysis. *World J Otorhinolaryngol Head Neck Surg* 2018;5(1):41-8. doi: 10.1016/j.wjorl.2018.04.006.
9. Almendros I, Wang Y, Gozal D. The polymorphic and contradictory aspects of intermittent hypoxia. *Am J Physiol Lung Cell Mol Physiol* 2014;307:L129-L140. doi: 10.1152/ajplung.00089.2014.
10. Lavie L. Oxidative stress in obstructive sleep apnea and intermittent hypoxia--revisited--the bad ugly and good: implications to the heart and brain. *Sleep Med Rev* 2015;20:27-45. doi: 10.1016/j.smrv.2014.07.003.
11. Duran J, Esnaola S, Rubio R, Iztueta A. Obstructive sleep apnea-hypopnea and related clinical features in a population-based sample of subjects aged 30 to 70 yr. *Am J Respir Crit Care Med* 2001;163:685-9. [PubMed: 11254524.]
12. Farre N, Farre R, Gozal D. Sleep Apnea Morbidity: A Consequence of Microbial-Immune Cross-Talk? *Chest* 2018;154:754-9. S0012-3692(18)30405-7. doi: 10.1016/j.chest.2018.03.001.
13. Khalyfa A, Kheirandish-Gozal L, Gozal D. Exosome and Macrophage Crosstalk in Sleep-Disordered Breathing-Induced Metabolic Dysfunction. *Int J Mol Sci* 2018;19. doi: 10.3390/ijms19113383.
14. Sapina E, Torres G, Barbe F, Sánchez-de-la-Torre M. The Use of Precision Medicine to Manage Obstructive Sleep Apnea Treatment in Patients with Resistant Hypertension: Current Evidence and Future Directions. *Curr Hypertens Rep* 2018;20:60. doi: 10.1007/s11906-018-0853-3.
