# Supplementary material
Source: Elsevier journal article supplement (https://www.sciencedirect.com/science/article/pii/S0300289621001150)
Supplement: mmc6 [file S0300289621001150:mmc6.pdf]

## 2.4.A. Tratamiento médico de la apnea obstructiva del sueño

**Editor:** Nicolás González Mangado. Jefe de Servicio de Neumología. Director de la Unidad Multidisciplinar de Sueño (UMS). Fundación Jiménez Díaz. Instituto Investigación Sanitaria FJD. Madrid. Centro de Investigación Biomédica en Red de Enfermedades Respiratorias (CIBERES), Madrid, España.

**Francisco García Ríó.** Unidad de sueño, Servicio de Neumología, Hospital Universitario La Paz, IdiPAZ. Departamento de Medicina, Universidad Autónoma de Madrid. Centro de investigación Biomédica en Red de Enfermedades Respiratorias (CIBERES)

**Teresa Gómez García.** Hospital General Universitario Gregorio Marañón, Madrid. Centro de Investigación Biomédica en Red Enfermedades Respiratorias (CIBERES). España.

**Mercè Mayos Pérez.** Unidad de Sueño, Servicio de Neumología, Hospital de la Santa Creu i Sant Pau. Departamento de Medicina, Universitat Autònoma de Barcelona. Centro de Investigación Biomédica en Red Enfermedades Respiratorias (CIBERES), Instituto de Investigación Carlos III, Madrid, Spain

**Ramón Farré.** Unidad de Biofísica y Bioingeniería, Facultad de Medicina y Ciencias de la Salud, Universidad de Barcelona; CIBER de Enfermedades Respiratorias; Instituto de Investigaciones Biomédica August Pi Sunyer

Sus objetivos son resolver los signos y síntomas de la enfermedad, restaurar la calidad del sueño, normalizar el índice de apnea-hipopnea (IAH), normalizar en lo posible la saturación de oxihemoglobina, reducir el riesgo de complicaciones y disminuir los costes de la enfermedad. Las distintas alternativas no son excluyentes y se recomienda una aproximación terapéutica de carácter multidisciplinario.

### Medidas generales

Se deben establecer en todos los pacientes con apnea obstructiva del sueño (AOS), tanto si está indicado o no el tratamiento con presión positiva continua en la vía aérea superior (CPAP). Incluyen medidas higiénico-dietéticas, de estilo de vida y el tratamiento específico de determinados trastornos.

#### Medidas higiénico-dietéticas

En todo paciente afecto de AOS, independientemente de su gravedad, se recomiendan las siguientes medidas para conseguir una buena higiene de sueño:

1. Mantener un horario regular de sueño.
2. Asegurar un ambiente adecuado. Dormir en un ambiente relajado, sin ruido, con control de temperatura y en una cama cómoda.
3. No acostarse sin tener necesidad de descanso y evitar en las horas previas actividades que requieran concentración mental importante, ejercicio físico intenso o una ingesta alimenticia abundante y calórica.
4. Evitar actividades en la cama como ver la televisión, jugar con dispositivos electrónicos, hablar por teléfono, discutir, etc.
5. No prolongar excesivamente el tiempo en cama.
6. Individualizar las siestas. Aunque son útiles en personas que realizan turnos o que no pueden dormir suficientes horas de forma continuada, dificultan la conciliación del sueño nocturno en otros sujetos.

### Estilo de vida

- **Ejercicio.** Es recomendable que los pacientes con AOS realicen ejercicio físico de manera regular durante el día. El ejercicio tiene un efecto beneficioso sobre el IAH y la excesiva somnolencia diurna (ESD), independientemente de las características del ejercicio e incluso de los cambios en el índice de masa corporal (IMC)<sup>1</sup>.
- **Alcohol.** Favorece el edema de la vía aérea superior y la hipotonía de los músculos dilatadores faríngeos, incrementando el número y la duración de las apneas, de la hipoxemia y de la fragmentación del sueño<sup>2</sup>. En todos los pacientes con AOS debe evitarse su consumo 6 h antes de acostarse.
- **Tabaco.** Incrementa la inflamación de la vía aérea superior y se relaciona con un mayor riesgo de desarrollar roncopatía y AOS<sup>3</sup>. Se recomiendan medidas para el abandono del tabaco, controlando siempre el posible aumento de peso.

### Fármacos

Las *benzodiazepinas* y sus derivados pueden agravar la AOS al aumentar la colapsabilidad de la vía aérea superior y deprimir la respuesta ventilatoria a la hipoxia e hipercapnia, por lo que se debe evitar su administración<sup>4</sup>. Si se requieren inductores del sueño, son preferibles los hipnóticos no benzodiazepínicos, como *zolpidem* o *zopiclona*, o antihistamínicos de cuarta generación.

### **Tratamiento de enfermedades asociadas**

- **Obesidad.** Se recomienda el tratamiento del sobrepeso u obesidad en todos los pacientes con AOS, puesto que la reducción ponderal disminuye el IAH, mejora la oxigenación nocturna, la arquitectura del sueño y la somnolencia diurna<sup>5</sup>, pudiendo revertir por completo el trastorno de pacientes con AOS leves-moderadas<sup>6</sup>. En enfermos que utilizan CPAP, el tratamiento de la obesidad potencia su efecto sobre la presión arterial, los

niveles séricos de triglicéridos y la sensibilidad a la insulina<sup>7</sup>. El tratamiento inicial de la obesidad se ha de enmarcar en un programa integral de alta intensidad que incluya modificaciones en el estilo de vida (dieta hipocalórica, práctica regular de ejercicio e incremento de la actividad física habitual) y estrategias de tipo conductual para corregir comportamientos o hábitos no saludables<sup>8</sup>. En la obesidad grave, la dificultad para mantener la pérdida de peso requiere estrategias más duraderas que deberán ser evaluadas en unidades especializadas, donde se valorará la indicación de fármacos antiobesidad<sup>8</sup> o tratamiento quirúrgico. La cirugía de la obesidad (cirugía bariátrica) es muy eficaz en pacientes con obesidad mórbida (IMC > 40 kg/m<sup>2</sup> o > 35 kg/m<sup>2</sup> y comorbilidad asociada) cuando fracasa el tratamiento conservador. Aunque sus resultados en el control de la obesidad y de la AOS son excelentes<sup>9-12</sup>, no está exenta de complicaciones, por lo que los candidatos deben ser seleccionados cuidadosamente.

- **Hipotiroidismo.** Puesto que el tratamiento sustitutivo mejora el IAH de pacientes con AOS e hipotiroidismo, se deben determinar las hormonas tiroideas ante la sospecha clínica de hipotiroidismo<sup>13</sup>.
- **Reflujo gastroesofágico (RGE).** Se recomienda confirmar la presencia de RGE en caso de clínica sugestiva e indicar la realización de medidas posturales y dietéticas, así como individualizar el tratamiento con inhibidores de la bomba de protones.

## 1. Tipos de equipos y funcionamiento

### *Principio de la aplicación de CPAP*

La terapia de CPAP se puede aplicar mediante aparatos basados en diferentes soluciones de ingeniería (p. ej., con un ventilador mecánico convencional en cuidados intensivos o con un sistema de burbuja en neonatos). No obstante, para el tratamiento convencional de los trastornos respiratorios del sueño, principalmente la AOS, se utiliza de forma exclusiva un sistema basado en la propuesta seminal planteada por el laboratorio de Colin Sullivan en 1981<sup>14</sup>. El sistema está basado en un generador de tipo turbina capaz de crear un flujo de aire con una presión de salida (vía aérea) mayor a la de entrada (aire ambiente) gracias al diseño especial de sus palas giratorias. El flujo generado por la turbina es dirigido al paciente mediante una tubuladura y una máscara aplicada a la vía aérea. La colocación de una vía para la fuga de aire cerca de la entrada de la máscara, o en la misma máscara, es fundamental para evitar la reinhalación por parte del paciente en un sistema que posee un único tubo para la inspiración y la espiración. En efecto, el aire que, procedente de la turbina, llega a la zona de la máscara tiene dos posibles vías de circulación en paralelo: bien salir al ambiente a través de la fuga, bien dirigirse a los pulmones del paciente si este está inspirando. La fuga está diseñada para impedir la reinhalación, de tal manera que su resistencia al flujo para el menor valor de CPAP aplicable (típicamente 4 cmH<sub>2</sub>O) sea tal que a través de la fuga circule un flujo correspondiente a la ventilación-minuto del paciente. Por esta razón es importante utilizar fugas que estén especialmente diseñadas para la aplicación de CPAP. En principio, una fuga diseñada para CPAP se podría utilizar con cualquier dispositivo de este tipo, al menos desde el punto de vista de seguridad (evitar la reinhalación). No obstante, como se explica a continuación, el resultado podría no ser óptimo en cuanto a la estabilidad de la presión nasal aplicada al paciente.

La aplicación del flujo constante de una turbina a través de una máscara con una fuga adecuada consigue generar una presión constante en la vía aérea. Sin embargo, para una cierta potencia de funcionamiento de la turbina la presión aplicada solo será constante en el caso de que el paciente no respire. En efecto, si el paciente inspira, parte del flujo procedente de la turbina entrará en los pulmones, el flujo de aire hacia el ambiente a través de la fuga será menor y, por tanto, también será menor la caída de presión entre la entrada de la fuga y el ambiente. En consecuencia, será menor la presión positiva en la máscara. Naturalmente, para un determinado flujo de la turbina, cuanto mayor sea el flujo inspiratorio mayor será la caída de presión en la máscara. Por tanto, para conseguir una correcta CPAP, es decir, una presión constante a lo largo del ciclo respiratorio del paciente, es necesario que la intensidad de la turbina esté modulada de forma adecuada (debe generar mayor flujo cuanto mayor sea el flujo inspiratorio del paciente). Esto se consigue mediante un circuito de realimentación en el control de la turbina. El aparato de CPAP dispone de un sensor que mide la presión y es capaz de modular la potencia de la turbina para generar en cada

momento el flujo necesario para que la presión sea constante. Como la presión se mide en el aparato de CPAP y no directamente en la máscara, el aparato debe estimar la presión nasal a partir de la presión y el flujo medidos en la turbina, y para ello se requiere conocer la relación presión-flujo (resistencia efectiva; que normalmente no es lineal) de la fuga. En consecuencia, para que un aparato de CPAP sea capaz de compensar de forma óptima las oscilaciones de presión debidas a la respiración del paciente debe utilizarse la fuga asociada a dicho aparato específico. Sin embargo, pueden utilizarse de forma óptima otras fugas distintas si el aparato de CPAP tiene incorporado un catálogo de posibles fugas a seleccionar o dispone de un protocolo de calibración mediante el cual se pueda calibrar la fuga que hay que utilizar.

#### *Modalidad de CPAP automática*

Una modalidad de CPAP muy extendida en el tratamiento de la AOS es la CPAP automática (o auto-CPAP). Una auto-CPAP no es más que un aparato de CPAP en que el valor de la presión aplicada no es fijo (como en los equipos convencionales), sino que va variando en función de las necesidades del paciente a lo largo de la noche. Estos dispositivos están diseñados para dar respuesta al hecho bien conocido de que la presión necesaria para estabilizar la vía aérea, y por tanto la respiración, durante el sueño en pacientes con AOS no es constante. Algunos de estos cambios en la presión óptima pueden tener lugar dentro de una misma noche, por ejemplo los debidos al cambio de postura corporal o a la fase del sueño, mientras que otros tienen un patrón temporal que puede variar de una noche a la siguiente, como en caso de ingestión de alcohol o ciertos medicamentos. Es importante destacar que a medio y largo plazo es muy relevante el cambio de presión óptima con los cambios de peso corporal. El tratamiento con CPAP convencional se basa en efectuar una titulación de presión en un primer momento (normalmente en la fase diagnóstica) para determinar el valor de la presión a aplicar de manera constante durante el tratamiento a lo largo de meses o años. Este procedimiento tiene la consecuencia obvia de que el tratamiento no se puede adaptar a los posibles cambios de colapsabilidad de la vía aérea del paciente. En contraposición, en condiciones ideales, la auto-CPAP solucionaría este problema. Sin embargo, la aplicación práctica de la auto-CPAP no es sencilla, ya que requiere que el aparato tenga incorporados procedimientos de detección inteligentes para detectar en tiempo real y de forma automática si el paciente presenta apneas, hipopneas, limitación de flujo o ronquido. Además, el dispositivo debe ser capaz de diferenciar estos episodios obstructivos de las típicas e imprevisibles alteraciones del patrón respiratorio inducidas normalmente durante el sueño (tos, deglución de saliva, espiración bucal, fonación), además de las fugas de aire incontroladas, que pueden variar a lo largo de la noche sobre todo debido a cambios posturales o movimientos del paciente.

El control inteligente de los aparatos de auto-CPAP no solo debe ser capaz de detectar los episodios obstructivos a partir únicamente de los sensores (presión y flujo) que lleva incorporados, algo muy complejo desde el punto de vista tecnológico, además debe tener activado un árbol de decisiones para modificar el valor de la presión nasal aplicada en función del estado de respiración del paciente. Definir tal árbol de decisiones no presenta una dificultad técnica especial, pero requiere la aplicación de criterios clínicos concretos para los cuales no existe experiencia sólida. Solamente por citar algunos ejemplos: ¿después de cuántas apneas o hipopneas hay que aumentar la presión?, ¿en cuánto se aumenta la presión cada vez?, ¿cada cuándo y cómo se decide que la presión aplicada es demasiado alta y hay que reducirla? Ante las distintas posibilidades, cada fabricante de equipos de auto-CPAP decide sus criterios específicos, que además acostumbran a ser confidenciales para proteger la propiedad intelectual. En consecuencia, el profesional clínico se encuentra con que cada aparato de auto-CPAP funciona de forma diferente y además aparece como una caja negra, ya que su modo de funcionamiento no suele estar detallado. Para poder valorar el modo de funcionamiento de los aparatos de auto-CPAP una posibilidad es la de probarlos en un banco de pruebas mediante pacientes simulados que presenten episodios obstructivos perfectamente definidos. Este tipo de prueba es efectivo para detectar algunas características del funcionamiento de las auto-CPAP, en particular que ante los mismos estímulos (patrones respiratorios de pacientes simulados) la respuesta depende de cada aparato<sup>15</sup>. No obstante, como es imposible simular la casi infinita variedad de episodios y artefactos que se encuentran en los pacientes, la efectividad de los aparatos de auto-CPAP debe acabar siendo evaluada en estudios clínicos. Es interesante destacar que en tales estudios no se evalúa propiamente si el concepto de auto-CPAP funciona correctamente, sino si lo hace el aparato específico que se está ensayando en aquel estudio.

### *Tubuladura y máscara*

La aplicación de CPAP, ya sea fija o automática, se efectúa a través de distintas variantes de máscara, aplicada generalmente en la nariz, ya que esta es la vía más habitual de ventilación durante el sueño. Si bien está descrito que durante el sueño la respiración a través de la boca (o la inspiración nasal y espiración bucal) no es rara, es de destacar que cuando se aplica una presión positiva a través de la nariz el desplazamiento del velo de paladar provoca que la vía nasal sea la prioritaria, y la respiración bucal está enormemente reducida. No obstante, en algunos pacientes es necesario usar una máscara naso-bucal de forma que la CPAP se aplica simultáneamente a las dos posibles entradas de las vías aéreas. Es importante destacar que la máscara, más que el aparato de CPAP, es a menudo el principal elemento determinante de la aceptación del tratamiento por parte del paciente. En efecto, la máscara de CPAP debe adaptarse a la superficie del rostro del paciente, consiguiendo un difícil equilibrio. Por una parte, el contacto máscara-piel debe ser

suficientemente firme para resultar estanco (a fin de evitar las fugas que la propia presión induce), pero esta firmeza de sujeción debe evitar no solo la irritación y laceración de la piel después de horas de uso, como es obvio, sino que debe minimizar la incomodidad del paciente durante el sueño. En consecuencia, la mejora en el diseño geométrico y en los materiales de fabricación de la máscara es de extraordinaria importancia para conseguir un óptimo cumplimiento del tratamiento con CPAP. Aunque de menor importancia, otras dos características relacionadas con la interfase que aumentan la comodidad del paciente son que tenga un buen sistema de articulación y giro en su conexión con la tubuladura y que esta sea suficientemente flexible y ligera para que no se dificulten los cambios posturales del paciente durante el sueño. Por razones históricas, a menudo se tiende a prestar más atención al tipo/modelo de aparato de CPAP (e incluso al valor de la presión aplicada) que al interfaz con el paciente (tubuladura y máscara), siendo este último factor probablemente el que más influya en el cumplimiento a largo plazo de la terapia con CPAP.

#### *Otros aspectos técnicos*

Los equipos utilizados en las terapias respiratorias domiciliarias (TRD) deben cumplir los requisitos establecidos en el Real Decreto 1591/2009, de 19 de octubre, por el que se regulan los productos sanitarios, así como la norma internacional de seguridad para los aparatos de uso médico, además de otras normativas y reales decretos que las regulan. Por otra parte, existe una normativa local, autonómica y estatal vigente aplicable en cada momento a todos los equipos utilizados, electromédicos o no, así como al material fungible, con la obligación de que todos ellos estén validados y en correcto estado de funcionamiento. Se exige que los equipos dispongan de instrucciones y etiquetado adecuado, comprensible, en español, en especial para actuación en casos de emergencia.

Los dispositivos de CPAP deberán garantizar la capacidad de mantener la presión prescrita en la vía aérea durante todo el ciclo ventilatorio, hasta un rango máximo de  $\pm 0,5$  cmH<sub>2</sub>O (máxima fluctuación de la presión). Deberán indicar el mecanismo de detección de la fuga (por neumotacógrafo y/o por caída de presión) y el mecanismo de su compensación (por aumento del flujo de la turbina u otro). Además, el nivel sonoro deberá ser inferior a 30 dB en todo el ciclo ventilatorio, medidos a 1 m con la mascarilla puesta en el paciente, para una presión de 10 cmH<sub>2</sub>O.

Como mínimo, el equipo dispondrá de un contador horario que registre el uso efectivo de la máquina por el paciente y que permita al médico el seguimiento de la adherencia al tratamiento, incorporando para ello los datos de cumplimiento en los sistemas informáticos. Los equipos deberán estar preparados para poder incorporar una tarjeta de memoria para, en casos que así lo requiera el médico especialista, facilitar la lectura del cumplimiento y de episodios respiratorios como el IAH residual e información sobre el nivel de fugas.

También son necesarias otras especificaciones de tipo técnico, como la disponibilidad de rampa inicial de tiempo, que permita un límite mínimo de 30 min; doble aislamiento eléctrico, para seguridad del paciente, con posibilidad de funcionar con corriente de 125/220 V alterna y de conexión a fuente de corriente continua de 12 V (encendedor de coche o directo a batería) para los pacientes que así lo soliciten y la protección por fusible adecuado con doble aislamiento (clase II).

Los equipos que se suministren a pacientes no deberán tener una antigüedad de fabricación superior a 10, garantizando de esta manera una actualización tecnológica y prestaciones mínimas.

Las CPAP deberán tener un peso  $\leq 2$  kg, sin incluir el resto de accesorios.

Deberán entregarse además del equipo de CPAP, filtros, tubuladuras de conexión anticolapsables (que permitan mantener la presión prescrita con pérdidas no superiores a 0,5 cmH<sub>2</sub>O y con una longitud de hasta 2 m), interfases con tamaños y arneses adaptables y aquellas que puedan ser necesarias en el caso de necesidades especiales por inadaptación, heridas o lesiones faciales, asegurando en definitiva la buena adaptación y ausencia de fugas (olivas nasales, mascarilla naso-bucal, mentoneras, etc.).

Otros dispositivos necesarios para aplicar un tratamiento suplementario como el oxígeno, o un humidificador-calentador, se indicarán por el médico en aquellos pacientes que así se aconseje. Cuando el paciente lo requiera, el equipo de CPAP debería tener la capacidad opcional de conectar dispositivos para la medición de la oximetría e integrar dicha información con el resto de los datos de la terapia. El equipo de CPAP deberá instalarse con la presión prefijada por el médico especialista o con el rango de presiones prescritas en el caso de auto-CPAP. La instalación de la CPAP, así como los fungibles necesarios para su uso, se dispensarán convenientemente embalados, preparados y/o precintados, asegurando que es el primer uso para cada receptor y siempre deberá efectuarse con el paciente presente.

Es deseable que los equipos de CPAP y APAP incorporen algoritmos de detección de episodios validados clínicamente y que cuenten con funcionalidades que permitan mejorar la adherencia del paciente a la terapia.

Se deberá disponer de equipos con capacidad para telemonitorización con el fin de facilitar su aplicabilidad en los casos que se especifican en el siguiente apartado sobre seguimiento. Es recomendable que los equipos permitan utilizar un sistema de telemonitorización durante



los primeros 3 meses de tratamiento, manteniéndose durante más tiempo en aquellos pacientes con problemas de adherencia o situaciones especiales y siempre que el especialista así lo requiera.

## 2. Efectos de la CPAP

La CPAP constituye un tratamiento eficaz para reducir la gravedad de la AOS, evaluada mediante el IAH. En pacientes con AOS moderada-grave, la CPAP disminuye el IAH 23-29 episodios/h, lo que supone una reducción del 86%<sup>16-26</sup>. Además, existe evidencia de su efecto sobre diferentes síntomas y comorbilidades.

### 1) *Somnolencia diurna excesiva*

- La CPAP reduce la somnolencia, evaluada tanto subjetiva como objetivamente, superando la mínima diferencia clínicamente relevante<sup>27-29</sup>. Recientemente, McEvoy y cols.<sup>30</sup> comprobaron en pacientes con AOS moderada-grave que la CPAP reduce a largo plazo (3-4 años) la puntuación de la escala de somnolencia de Epworth (ESE) en 2,5 unidades (2,2-2,8).
- Los ensayos sobre el efecto de la CPAP utilizando pruebas objetivas de somnolencia diurna, como el test de latencias múltiples de sueño o el test de Osler, también han identificado una reducción significativa de la diferencia media estandarizada<sup>29</sup>.

### 2) *Deterioro de la calidad de vida relacionada con el sueño*

El metaanálisis de los 13 ensayos clínicos disponibles actualmente sobre el tema demuestra que la CPAP mejora la calidad de vida relacionada con el sueño de los pacientes con AOS<sup>31</sup>, mientras resulta ineficaz sobre la calidad de vida genérica.

### 3) *Hipertensión arterial*

- La CPAP no ha demostrado efecto sobre la presión arterial (PA) de pacientes normotensos con AOS<sup>32-34</sup>.
- Hasta el momento se han identificado cinco ensayos clínicos realizados en pacientes hipertensos con AOS moderada-grave<sup>35-38</sup>. En pacientes con AOS moderada-grave recién diagnosticados de hipertensión y sin tratamiento concomitante, la CPAP disminuye 3-4 mmHg la PA sistólica, diurna y nocturna, y 2 mmHg ambas PA diastólicas<sup>35</sup>, manteniendo a largo plazo una reducción de unos 2 mmHg en la PA sistólica y diastólica de 24 h<sup>35,38</sup>. El metaanálisis de los ensayos realizados en pacientes hipertensos con AOS moderada-grave confirma que la CPAP reduce 2-4 mmHg la PA sistólica y diastólica, diurna, nocturna y de 24 h, alcanzando más efecto sobre las medidas nocturnas<sup>31</sup>.

- Este efecto resulta particularmente importante en pacientes con hipertensión resistente, que no siempre logran el control de la PA con un elevado número de fármacos. El estudio HIPARCO identificó una disminución de la PA media (3,1 [0,6-5,6] mmHg) y diastólica de 24 h (3,2 [1,0-5,4] mmHg) y una reducción del porcentaje de pacientes *non-dipper*<sup>39</sup>. Un metaanálisis de los ensayos clínicos realizados en pacientes con AOS e hipertensión resistente confirma que la CPAP reduce la PA sistólica y diastólica nocturnas, y la PA sistólica y diastólica de 24 h.

#### 4) *Otras comorbilidades cardiovasculares y metabólicas*

Se ha descrito que los hombres con AOS grave no tratado tienen más episodios cardiovasculares fatales y no fatales en 10 años que los pacientes adecuadamente tratados<sup>40</sup>, mientras que la ausencia de tratamiento con CPAP incrementa el riesgo de episodios cardiovasculares en mujeres con un IAH  $\geq 10$ <sup>41</sup>. Aunque un metaanálisis de estudios observacionales halló una disminución clínicamente significativa de episodios cardiovasculares en pacientes tratados con CPAP<sup>29</sup>, este hallazgo no se ha confirmado en ensayos clínicos<sup>28,30,36,42-44</sup>.

En prevención primaria, el estudio CERCAS no identificó un efecto de la CPAP en pacientes con AOS moderada-grave, sin somnolencia ni enfermedad cardiovasculares, sobre la incidencia de hipertensión o episodios cardiovasculares durante 4 años, aunque sí se detectó un efecto beneficioso en los pacientes con mayor adherencia a la CPAP<sup>36</sup>.

En enfermos con un primer episodio de ictus isquémico y AOS moderada-grave, la CPAP no redujo la incidencia de episodios cardiovasculares en 5 años. En pacientes con cardiopatía isquémica y AOS moderada-grave sin ESD, la CPAP tampoco redujo la incidencia de revascularización, infarto de miocardio, ictus o mortalidad cardiovascular, aunque se apreció una tendencia beneficiosa en los que la utilizaban más de 4 h/noche<sup>44</sup>. En adultos con AOS moderada-grave y enfermedad coronaria o cardiovascular, el estudio SAVE tampoco detectó un efecto de la CPAP sobre un índice compuesto (muerte cardiovascular, infarto de miocardio, ictus, hospitalización por angina inestable, insuficiencia cardíaca o accidente isquémico transitorio) ni sobre sus componentes aislados<sup>30</sup>. Aunque el cumplimiento medio de la CPAP resultó de 3,3 h/noche, el subgrupo de pacientes con buena adherencia tampoco mostró efecto alguno del tratamiento. En el reciente estudio ISAACC<sup>45</sup> tampoco se encontró un efecto protector de la CPAP aplicada de forma precoz sobre pacientes con AOS moderada-grave que habían sufrido un síndrome coronario agudo.

Pese a la asociación entre la AOS y la diabetes, no se ha demostrado que la CPAP reduzca la glucemia en ayunas de pacientes con AOS moderada-grave<sup>29</sup>. Aunque más controvertido, tampoco se ha identificado un efecto global de la CPAP sobre la hemoglobina glucosilada (HbA1c)<sup>29</sup> en pacientes diabéticos o no diabéticos con AOS.

En contraste con algunos estudios observacionales, los ensayos clínicos disponibles tampoco detectan una reducción de la mortalidad de cualquier causa inducida por la CPAP<sup>30,36,42,44</sup>.

### *5) Estado de ánimo y función neurocognitiva*

Aunque 3 meses de tratamiento con CPAP mejoran los índices de depresión y ansiedad de ancianos con AOS grave<sup>46</sup>, un metaanálisis de los ensayos disponibles identifica una mejoría de las escalas HADS de depresión y ansiedad<sup>29</sup>, pero inferiores al mínimo cambio clínicamente relevante<sup>47</sup>.

- También se ha descrito que la CPAP mejora la memoria episódica y a corto plazo de ancianos con AOS grave<sup>48</sup>, pese a que su efecto sobre distintos subdominios de la función ejecutiva, velocidad de procesamiento, atención y vigilancia, memoria o inteligencia no alcanza significación en el metaanálisis<sup>29</sup>.

### *6) Accidentabilidad*

- Se mantiene la discordancia entre los resultados de estudios observacionales o no aleatorizados que sugieren una disminución del riesgo de accidentabilidad, y cuatro ensayos clínicos, que no detectan un efecto de la CPAP sobre la evitación de obstáculos en simuladores<sup>22,49-51</sup>. En cualquier caso, la ESD es el principal factor de riesgo de accidentabilidad en conductores<sup>52</sup>, considerándose no aptos para la conducción aquellos sujetos con un IAH > 15 y ESD.

## **3. Indicaciones de la CPAP**

Continúa siendo el tratamiento de elección en muchos pacientes con AOS y su indicación debe estar fundamentada en un estudio diagnóstico objetivo (v. capítulo correspondiente). Sus objetivos son la corrección de los episodios respiratorios, la mejoría de la sintomatología clínica y el control de las comorbilidades relacionadas. Aunque se dispone de amplia evidencia científica sobre el impacto positivo de la CPAP, todavía se mantienen áreas de incertidumbre, especialmente relacionadas con su efecto sobre la comorbilidad

cardiovascular y metabólica. Por tanto, las siguientes recomendaciones están basadas en la evidencia actual de calidad contrastada.

La mayoría de la información disponible sobre el efecto de la CPAP procede de ensayos clínicos en pacientes con AOS moderada-grave<sup>29</sup>, es decir, con un IAH  $\geq 15$  que además constituye el punto de corte que mejor se relaciona con la presencia de ESD<sup>38</sup> y el incremento de la presión arterial<sup>29,53</sup>. Por tanto, se considerará la recomendación de CPAP en todo paciente con un IAH  $\geq 15$  h<sup>-1</sup>, que cumpla alguno de los siguientes tres criterios:

#### *Excesiva somnolencia diurna*

- Esta recomendación se basa en la demostración, con una calidad de evidencia alta, que la CPAP mejora significativamente la somnolencia autorreferida y la capacidad para mantener la vigilia en pacientes con ESD. En las recientes recomendaciones de la AASM<sup>29</sup>, en las que se revisan 38 ensayos clínicos aleatorizados, cinco de ellos en pacientes sin ESD, se reconoce un claro beneficio de la CPAP, pese a sus potenciales efectos secundarios, en pacientes con ESD, mientras que la mejoría inducida en pacientes sin ESD no resulta clínicamente relevante.

#### *Deterioro de la calidad de vida relacionada con el sueño*

La calidad de vida relacionada con el sueño incluye aspectos como el ronquido, episodios de asfixia nocturna, insomnio, cefalea matutina, nicturia, deterioro del rendimiento laboral o académico, repercusión social y/o cansancio durante el día. La CPAP mejora la calidad de vida evaluada mediante cuestionarios específicos, pero no afecta a la evaluada mediante cuestionarios inespecíficos. Por tanto, esta recomendación se basa en la demostración que la CPAP mejora la calidad de vida relacionada con el sueño, pero no la calidad de vida general.

#### *Hipertensión arterial*

La CPAP reduce 2-4 mmHg la PA sistólica y diastólica, diurna, nocturna y de 24 h en pacientes hipertensos con AOS<sup>29</sup>, lo que resulta particularmente importante en pacientes con hipertensión resistente<sup>39</sup>. Por el contrario, no se ha demostrado efecto alguno de la CPAP sobre la PA en pacientes normotensos<sup>32,33,34</sup>. La información disponible no permite evaluar el efecto de la CPAP según la gravedad de la AOS y la desigual adherencia a la CPAP alcanzada, claramente subóptima en algunos estudios, que puede haber condicionado los resultados. La evidencia disponible permite recomendar la CPAP en pacientes con AOS e hipertensión y, especialmente, en aquellos con hipertensión arterial resistente.

### *Pacientes sin ESD ni hipertensión arterial*

En estos enfermos se plantea ocasionalmente la CPAP para la prevención del riesgo cardiovascular o metabólico<sup>54</sup>. Aunque diversos estudios observacionales muestran una reducción de episodios cardiovasculares y de mortalidad asociada a la CPAP, estos resultados no se han reproducido en ensayos clínicos aleatorizados, aunque su interpretación debe ser cautelosa por el bajo cumplimiento alcanzado en algunos de ellos. Además, la mayoría de ensayos han reclutado a pacientes con enfermedad cardiovascular establecida, mientras que la CPAP parece tener un impacto positivo en fases precoces de enfermedad cardiovascular o metabólica<sup>55</sup>, incluso en sujetos sin ESD<sup>56</sup>. Sin embargo, en ausencia de un ensayo definitivo de prevención primaria, difícil de llevar a cabo, la evidencia disponible es muy débil y no permite recomendar una indicación generalizada para la prevención primaria.

Con alguna excepción, la evidencia disponible no muestra que la CPAP reduzca la glucemia en ayunas ni la HbA1c en diabéticos o no diabéticos con AOS, aunque se ha referido una mejoría de la resistencia a la insulina, condición que a menudo antecede al desarrollo de diabetes tipo 2 (DM2)<sup>57-59</sup>, fundamentalmente en los pacientes menos obesos<sup>60,61</sup>.

Por tanto, no se recomienda la generalización del tratamiento con CPAP para reducir el riesgo cardiovascular o metabólico, aunque se puede individualizar su indicación y, de acuerdo con el paciente, realizar un ensayo terapéutico para valorar resultados.

- En definitiva, según la información disponible en la actualidad y en concordancia con la AASM<sup>31</sup>, se recomienda proponer un tratamiento con CPAP a aquellos pacientes con un diagnóstico objetivo de AOS moderada-grave (IAH > 15 h<sup>-1</sup>) que presenten somnolencia diurna excesiva (puntuación en la ESE ≥ 11), deterioro de la calidad de vida relacionada con el sueño (manifestada, sobre todo, por ronquidos intensos, episodios asfícticos nocturnos, insomnio, cefaleas matutinas, nicturia, deterioro del rendimiento laboral o académico, repercusión social y/o cansancio, entre otros) o hipertensión asociada, particularmente si se trata de hipertensión resistente (**Figura 1**).

- No se dispone de suficiente evidencia para recomendar de forma sistemática el uso de CPAP en adultos sin ESD para reducir el riesgo de mortalidad o episodios cardiovasculares, por lo que en estos pacientes se propone un tratamiento conservador, con monitorización de síntomas, o una valoración individualizada para realizar un ensayo terapéutico con CPAP. De igual modo, en pacientes con AOS que presenten un IAH < 15, pero resulten muy sintomáticos o presenten una elevada carga de morbilidad cardiovascular o metabólica, se puede considerar discutir con el paciente la posibilidad de realizar un tratamiento de prueba con CPAP. Previamente se deben haber excluido otras causas de la

sintomatología presente y se debe revalorar el tratamiento a corto plazo, suspendiéndolo si no se encuentran los resultados esperados.

**Figura 1.** Algoritmo terapéutico propuesto por este Documento de Consenso para el manejo de la apnea obstructiva del sueño (AOS). CPAP: presión positiva continua a nivel de vía aérea superior; DAM: dispositivo de avance mandibular; IAH: índice de apneas-hipopneas; IMC: índice de masa corporal; ORL: otorrinolaringología.

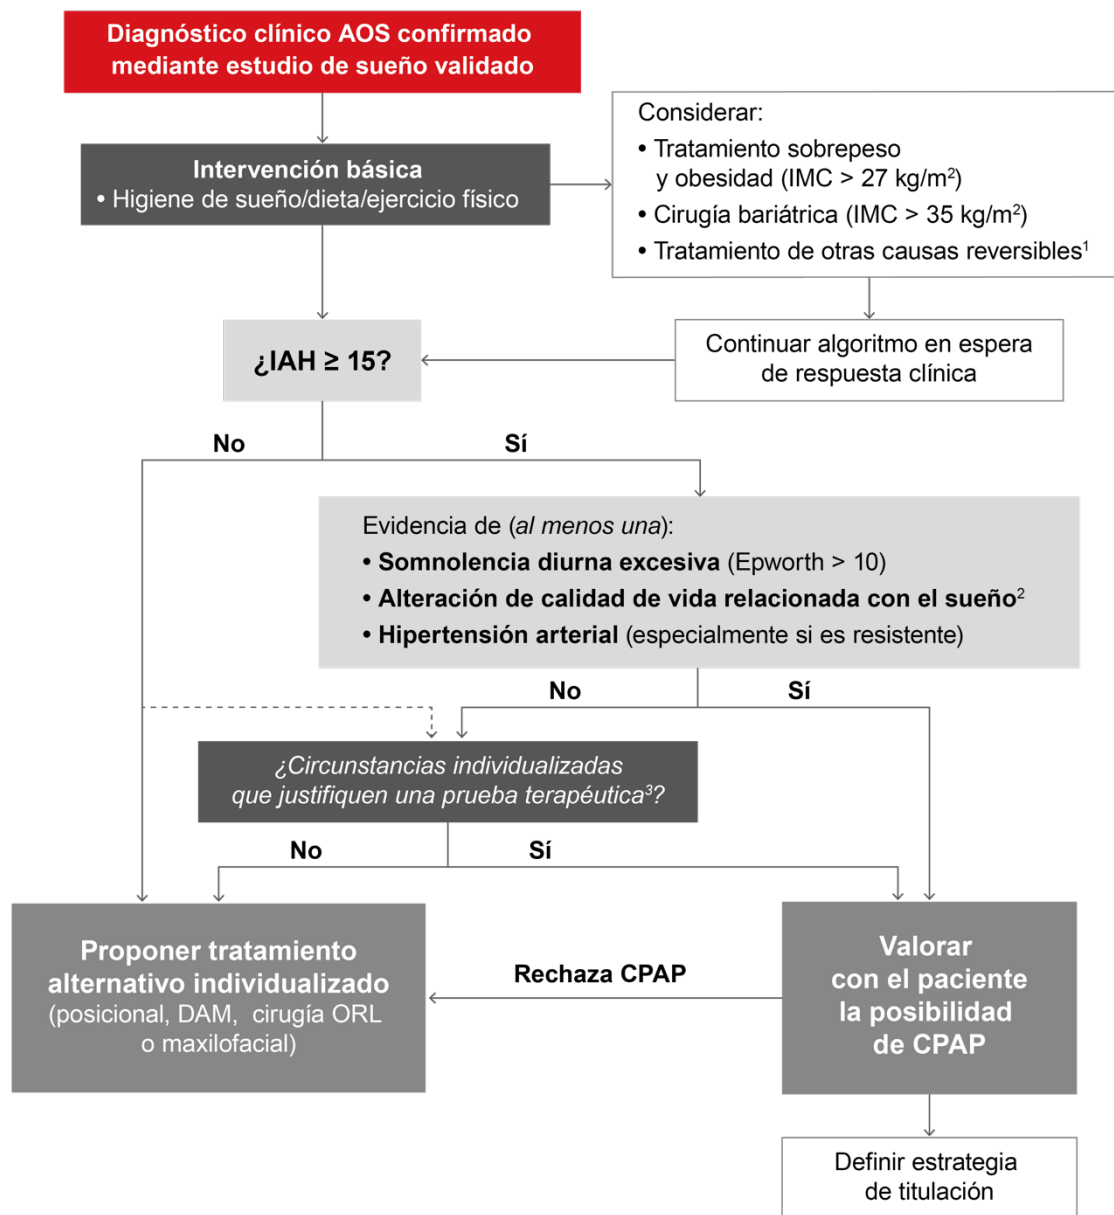

1. Hipertrofia amigdal, alteraciones dentofaciales graves, acromegalia, hipotiroidismo y otras.

2. Ante la ausencia de cuestionarios específicos de uso clínico se recomienda considerar ronquidos intensos, episodios asfícticos, insomnio, cefalea matutina, nicturia, deterioro del rendimiento laboral o académico, repercusión social y/o cansancio.

3. Utilizar CPAP con valoración a corto plazo de eficacia terapéutica y retirada si no se objetiva respuesta.

#### 4. Ajuste del nivel óptimo de presión

Debe individualizarse la presión óptima de CPAP de cada paciente. Aunque la polisomnografía (PSG) convencional es el procedimiento de referencia, su coste y disponibilidad ha llevado a considerar alternativas, como el cálculo mediante fórmulas, la

utilización de equipos de auto-CPAP (APAP) o la titulación con polisomnografía de noche partida (*split-night*). Con cualquiera de ellos resulta crítica la educación, el entrenamiento en el uso de CPAP y la selección de mascarillas y material adecuado para cada paciente.

*Ajuste de presión con polisomnografía convencional*

Es el método de referencia para determinar la presión que elimine las apneas e hipopneas, el ronquido, los desfases toracoabdominales, los microdespertares respiratorios y las desaturaciones<sup>63</sup>.

El paciente se duerme con la CPAP colocada con 4 cmH<sub>2</sub>O y, ante episodios respiratorios claros (apneas, hipopneas, ronquidos o limitaciones prolongadas del flujo aéreo), se sube la presión 1 cmH<sub>2</sub>O cada 2-5 min. Una vez normalizados los episodios respiratorios, se verifica si la presión alcanzada es adecuada en sueño REM y en decúbito supino. Finalmente, cuando el sujeto mantiene una arquitectura del sueño normalizada y no hay episodios respiratorios en unos 30 min, se reduce la presión (1 cmH<sub>2</sub>O/10 min) para observar si una menor presión resulta efectiva (**Figura 2**).

**Figura 2.** Representación esquemática de la modificación de la presión de presión positiva continua a nivel de vía aérea superior durante una titulación con polisomnografía.

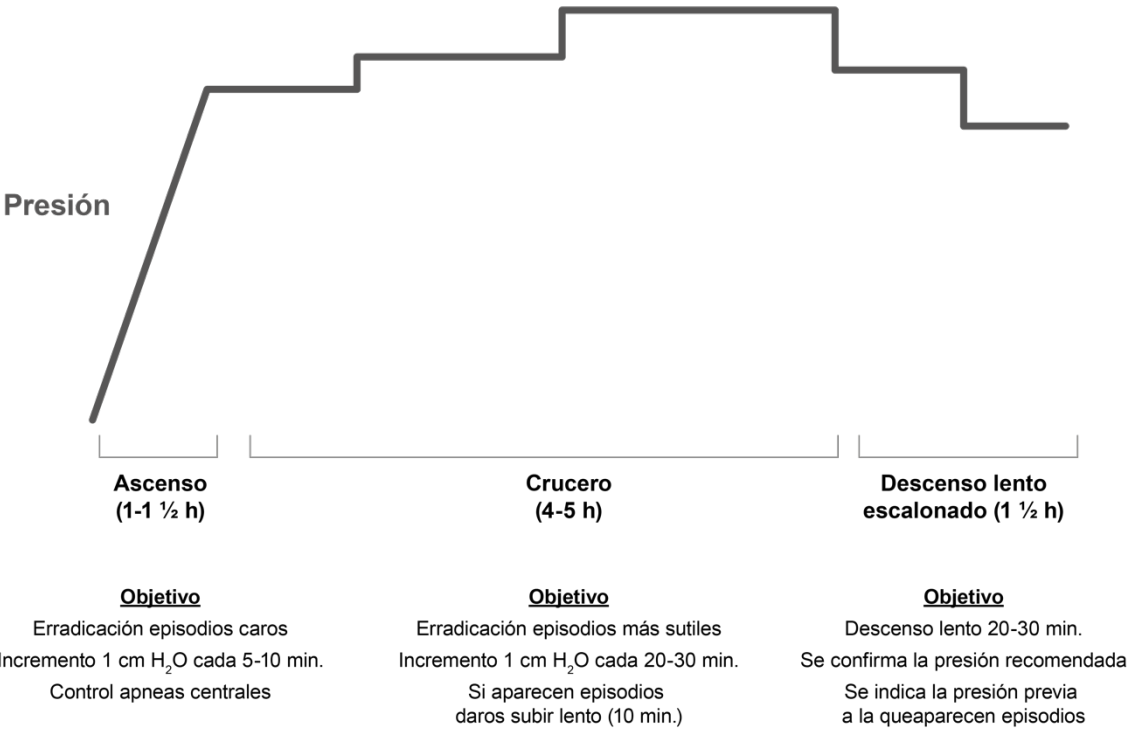



Se recomienda considerar el ajuste de presión con PSG para aquellos pacientes con enfermedad cardiopulmonar significativa (EPOC grave) o inestable (insuficiencia cardíaca) o desórdenes respiratorios del sueño complejos (Apneas del sueño centrales: ACS, sospecha de ACS emergente o síndrome de hipoventilación-obesidad) o en los que no ha sido posible la titulación con métodos simplificados.

#### *Ajuste de presión con polisomnografía de noche partida*

Para evitar una PSG diagnóstica y otra de ajuste se pueden efectuar ambas en una misma noche, lo que se denomina estudio de noche partida. Para ello se requiere que el período diagnóstico comprenda al menos 2 h de sueño y un IAH  $\geq 40$  (o  $> 20$  con largas apneas o importantes desaturaciones). El período de ajuste de presión debe documentar una reducción importante o desaparición de episodios respiratorios durante el sueño no REM y REM, tanto en decúbito lateral como supino. Esta opción es más económica, pero debe realizarse por técnicos experimentados, y garantizar una duración adecuada de los dos períodos del estudio. Este documento considera que con la disposición actual de sistemas automáticos de CPAP que permiten valorar durante varias noches su efecto, los estudios de titulación de CPAP de noche partida deben realizarse de manera excepcional. Además solo debe plantearse cuando se dispone de técnicos experimentados y en pacientes seleccionados por alta sospecha previa.

#### *Ajuste de presión con auto-CPAP*

Pueden realizarse tanto en el domicilio del paciente<sup>63-66</sup> como en el ámbito hospitalario. Las APAP disponen de un neumotacógrafo y un transductor de presión que permiten registrar presión, flujo, volumen y fugas del sistema, y almacenan la información de un número variable de noches. Proporcionan una determinación individualizada de la presión necesaria para suprimir los episodios respiratorios, pero no todas las APAP funcionan del mismo modo ni obtienen los mismos resultados<sup>67</sup>, por lo que la elección adecuada del sistema utilizado resulta imprescindible. Se recomiendan los equipos que modifican la presión en función de la onda de flujo inspiratorio.

Una comparación del ajuste de presión con PSG, APAP o fórmula no halló diferencias entre los tres procedimientos, aunque el ajuste mediante fórmula dejó un 11% de pacientes con un IAH  $> 20$  frente a un 3% de la APAP y un 4% de la PSG<sup>66</sup>. Recientemente, un metaanálisis de la evidencia disponible identifica un similar control de la AOS cuando se titula la presión en el laboratorio o mediante auto-PAP en domicilio (calidad de evidencia alta). No se identifican diferencias clínicamente significativas en la adherencia y se obtienen resultados similares en somnolencia residual (calidad de evidencia alta).

Es imprescindible que el paciente esté entrenado antes de hacer el ajuste de presión con auto-CPAP. Se debe realizar un análisis visual de la gráfica de presión y elegir la presión mínima que, sin considerar los picos de fuga, abarque el 90% del registro (percentil 90). Si las fugas mayores de 0,4 l/min superan un tercio de la noche, el registro no es válido para el análisis. No se recomienda la titulación con APAP en pacientes con enfermedad cardiopulmonar significativa (EPOC grave) o inestable (insuficiencia cardíaca) o desórdenes respiratorios del sueño complejos (ACS, sospecha de ACS emergente o síndrome de hipoventilación-obesidad). Tampoco es recomendable en sujetos que no presentan ronquido.

#### *Ajuste de presión mediante fórmula*

En comparación con los otros métodos, deja un IAH residual superior. El cálculo empírico mediante fórmula puede utilizarse al iniciar el tratamiento y hasta la realización del estudio de titulación definitivo (APAP o titulación manual). La implementación de equipos de CPAP con tarjeta de memoria puede simplificar la titulación, confirmando a través del análisis del IAH residual la respuesta a la presión estimada.

### **5. Cumplimiento de la CPAP**

Se considera que un cumplimiento es aceptable cuando la utilización del dispositivo es de un mínimo de 4 h/noche durante el 70% de las noches. La evidencia actual sugiere una relación dosis-respuesta entre horas de uso y respuesta terapéutica<sup>68,69</sup>, siendo precisamente en el cumplimiento donde se sustentan los efectos de la CPAP sobre la esfera neurocognitiva y cardiovascular, así como los beneficios percibidos en la calidad de vida<sup>70</sup>. El objetivo, por tanto, será el uso de la CPAP durante el máximo de horas de sueño. Por este motivo, este documento de consenso propone utilizar el concepto de cumplimiento óptimo con un mínimo de 6 h/noche, que ha mostrado beneficios en el control de los síntomas y en la morbilidad.

No resulta posible identificar *a priori* con precisión al paciente adherente, aunque aquellos que perciben mayor mejoría y tienen un buen control de los efectos secundarios utilizan más horas la CPAP<sup>71,72</sup>. El patrón de uso se establece en las primeras semanas, por lo que el cumplimiento durante los primeros 3 meses puede predecir el uso a largo plazo del dispositivo<sup>72,73</sup>.

Múltiples desarrollos tecnológicos pretenden mejorar la adherencia con resultados dispares. Sin embargo, el uso de APAP no ha demostrado aumentar el porcentaje de noches con uso superior a 4 h<sup>74,75</sup>. Las medidas de intervención educativa, de

comportamiento o de solución de problemas logran una mejoría relevante en la adherencia a la CPAP<sup>76-82</sup>.

**6. Estrategias de intervención para mejorar la adhesión y cumplimiento**

Como el patrón de adhesión a la CPAP se establece muy precozmente, la atención en los primeros meses será clave para obtener un adecuado cumplimiento a largo plazo<sup>83</sup>.

*Control de los efectos secundarios*

Un porcentaje elevado de pacientes presentará efectos secundarios en las primeras semanas de uso de la CPAP, que serán mayoritariamente leves y transitorios<sup>84</sup>. Si no se solucionan adecuadamente, pueden transformar a un paciente en incumplidor o condicionar su rechazo<sup>85</sup>. En la tabla 1 se resumen los efectos secundarios más habituales y las recomendaciones para su manejo.

**Tabla 1.** Efectos secundarios más frecuentes de la CPAP y su tratamiento. CPAP: presión positiva continua en vía aérea superior; ORL: otorrinolaringología.

| Efecto secundario            | Recomendaciones terapéuticas                                                                                               |
|------------------------------|----------------------------------------------------------------------------------------------------------------------------|
| Congestión/obstrucción nasal | Descongestionantes; corticoesteroides nasales; bromuro de ipratropio, humidificación térmico; evaluación ORL si no mejoran |
| Irritación cutánea           | Protección local; cambio mascarilla<br>Tratamiento tópico en dermatitis atópica                                            |
| Sequedad faríngea            | Hidratación; humidificación                                                                                                |
| Ruido                        | Evitar fugas; nuevos dispositivos                                                                                          |
| Conjuntivitis                | Ajuste de mascarilla                                                                                                       |
| Cefalea                      | Pasajera. Analgesia                                                                                                        |
| Epistaxis                    | Humidificación y ajuste de temperatura ambiente. Evaluación ORL si persiste                                                |
| Frío                         | Adecuada temperatura ambiente; humidificador térmico                                                                       |
| Insomnio                     | Medidas psicológicas de adaptación al uso de CPAP; rampa de presión; ansiolítico suave no benzodiazepínico                 |
| Aerofagia                    | Medidas psicológicas de adaptación a CPAP; ansiolíticos suaves; medidas posturales                                         |

#### *Humidificador térmico*

Su empleo no ha demostrado mejorar la adherencia, la somnolencia o la calidad de vida. Por tanto, la decisión de prescribir un humidificador térmico deberá estar basada en la tolerancia y preferencias del paciente.

#### *Selección de la interfase*

Un reciente metaanálisis concluye que el uso de máscara nasal se relaciona con un mayor cumplimiento y menor porcentaje de efectos secundarios que la interfase oro-nasal, sin detectar diferencias entre las interfaces nasales o intranasales. Por tanto, es preferible utilizar inicialmente una interfase nasal o intranasal e individualizar el uso de la máscara oro-nasal, teniendo en cuenta las preferencias del paciente y sus posibles efectos negativos.

#### *Nuevas modalidades de CPAP*

Con el objetivo de mejorar la tolerancia y la adhesión al tratamiento, se han diseñado equipos de CPAP avanzados que ofrecen diversas ventajas teóricas. La CPAP binivel permite disminuir la presión y el trabajo espiratorio, mejorando el confort del paciente. Sus resultados sobre adhesión son inconsistentes, por lo que, dado su mayor coste, no se recomienda su indicación rutinaria, limitándolo a aquellos pacientes con necesidades de presión elevadas que no toleran la CPAP convencional.

Los equipos de CPAP con presión flexible son capaces de disminuir la presión al inicio de la espiración e incrementarla al inicio de la inspiración, lo que puede mejorar el confort del paciente. Sin embargo, tampoco han mostrado superioridad respecto a la CPAP convencional en mejoría de la adhesión, cumplimiento terapéutico<sup>86</sup>, control de la somnolencia diurna o mejoría en la calidad de vida, por lo que tampoco se recomienda su uso rutinario.

#### *Implementación de programas de soporte*

Han demostrado ser una herramienta útil para mejorar la adhesión y el número de horas de utilización de la CPAP<sup>87</sup>. Los programas que incluyen estrategias de tipo conductual son las que obtienen mayores beneficios. El soporte continuado e intensivo también es superior al soporte convencional, mientras que el simple apoyo educativo al inicio de la terapia provoca una mejoría modesta.

## **7. Telemedicina**

Ofrece múltiples posibilidades para el diagnóstico y seguimiento de pacientes con AOS<sup>88-90</sup>, aunque todavía quedan por resolver aspectos éticos y otros relacionados con la propiedad de los datos, la distribución de responsabilidades o el reembolso de este servicio, lo que aún limita su generalización<sup>91,92</sup>.

Recientemente, la AASM ha establecido los requerimientos necesarios para su implantación en unidades de sueño, además de plantear diversas recomendaciones técnicas y éticas<sup>93</sup>. Se ha propuesto su potencial aplicación en la realización de consultas clínicas iniciales, en la monitorización e interpretación de estudios de sueño, en la educación del paciente y en visitas de seguimiento, centrándose particularmente en la supervisión de la adhesión a la CPAP<sup>93</sup>.

Un metaanálisis demuestra que la telemonitorización incrementa el cumplimiento de la CPAP 1,0 (0,5-1,4) h/noche<sup>29</sup>. Entre las distintas aproximaciones se ha demostrado que un sistema de respuesta con voz interactiva mejora la adhesión a la CPAP, el estado funcional y los síntomas<sup>94,95</sup>, mientras que la retroalimentación automatizada de CPAP vía texto o email acorta el tiempo de entrenamiento sin comprometer la adhesión<sup>96</sup> y el acceso de los pacientes a una web informativa sobre el uso de la CPAP la aumenta<sup>97,98</sup>. En cualquier caso, en ausencia de más información al respecto y de estudios comparativos, no resulta posible recomendar actualmente una metodología concreta de aplicación de sistemas de telemedicina para incrementar la adhesión terapéutica en pacientes tratados con CPAP.

No obstante, y dado que el incremento de la adhesión a la CPAP mediante telemonitorización resulta clínicamente relevante (evidencia alta), se recomienda considerar el uso de intervenciones controladas con telemonitorización durante el período inicial de tratamiento con CPAP. En caso de aplicarse, estas deberían incluir el registro remoto de parámetros de la CPAP, como horas de uso, IAH residual, fugas no intencionadas y la configuración de la máquina<sup>29,99</sup>.

## **8. Seguimiento de los pacientes con CPAP**

Los protocolos de actuación diferirán según los recursos disponibles y la implicación de las empresas suministradoras, pero siempre será importante un manejo multidisciplinario con participación del especialista de sueño, el equipo de enfermería y la empresa suministradora. En el control a largo término deberá incluirse a la atención primaria.

La empresa suministradora deberá instalar el equipo en el plazo establecido y colaborar en el adiestramiento del paciente y sus familiares en el funcionamiento y el manejo de la CPAP. Su labor es complementaria y de ningún modo puede sustituir el apoyo del equipo

asistencial en las primeras semanas de tratamiento mediante consultas de enfermería o escuelas de CPAP.

#### *Periodicidad de los controles*

El Documento de Consenso sobre terapias respiratorias domiciliarias establece unas pautas generales de control que se adaptarán e individualizarán según las características de cada paciente (**Figura 3**).

**Figura 3.** Algoritmo del esquema de seguimiento de pacientes con apnea obstructiva del sueño propuesto en este Documento de Consenso sobre terapias respiratorias domiciliarias. AP: atención primaria; CPAP: presión positiva continua a nivel de vía aérea superior; SAHS: síndrome de apneas-hipopneas del sueño.

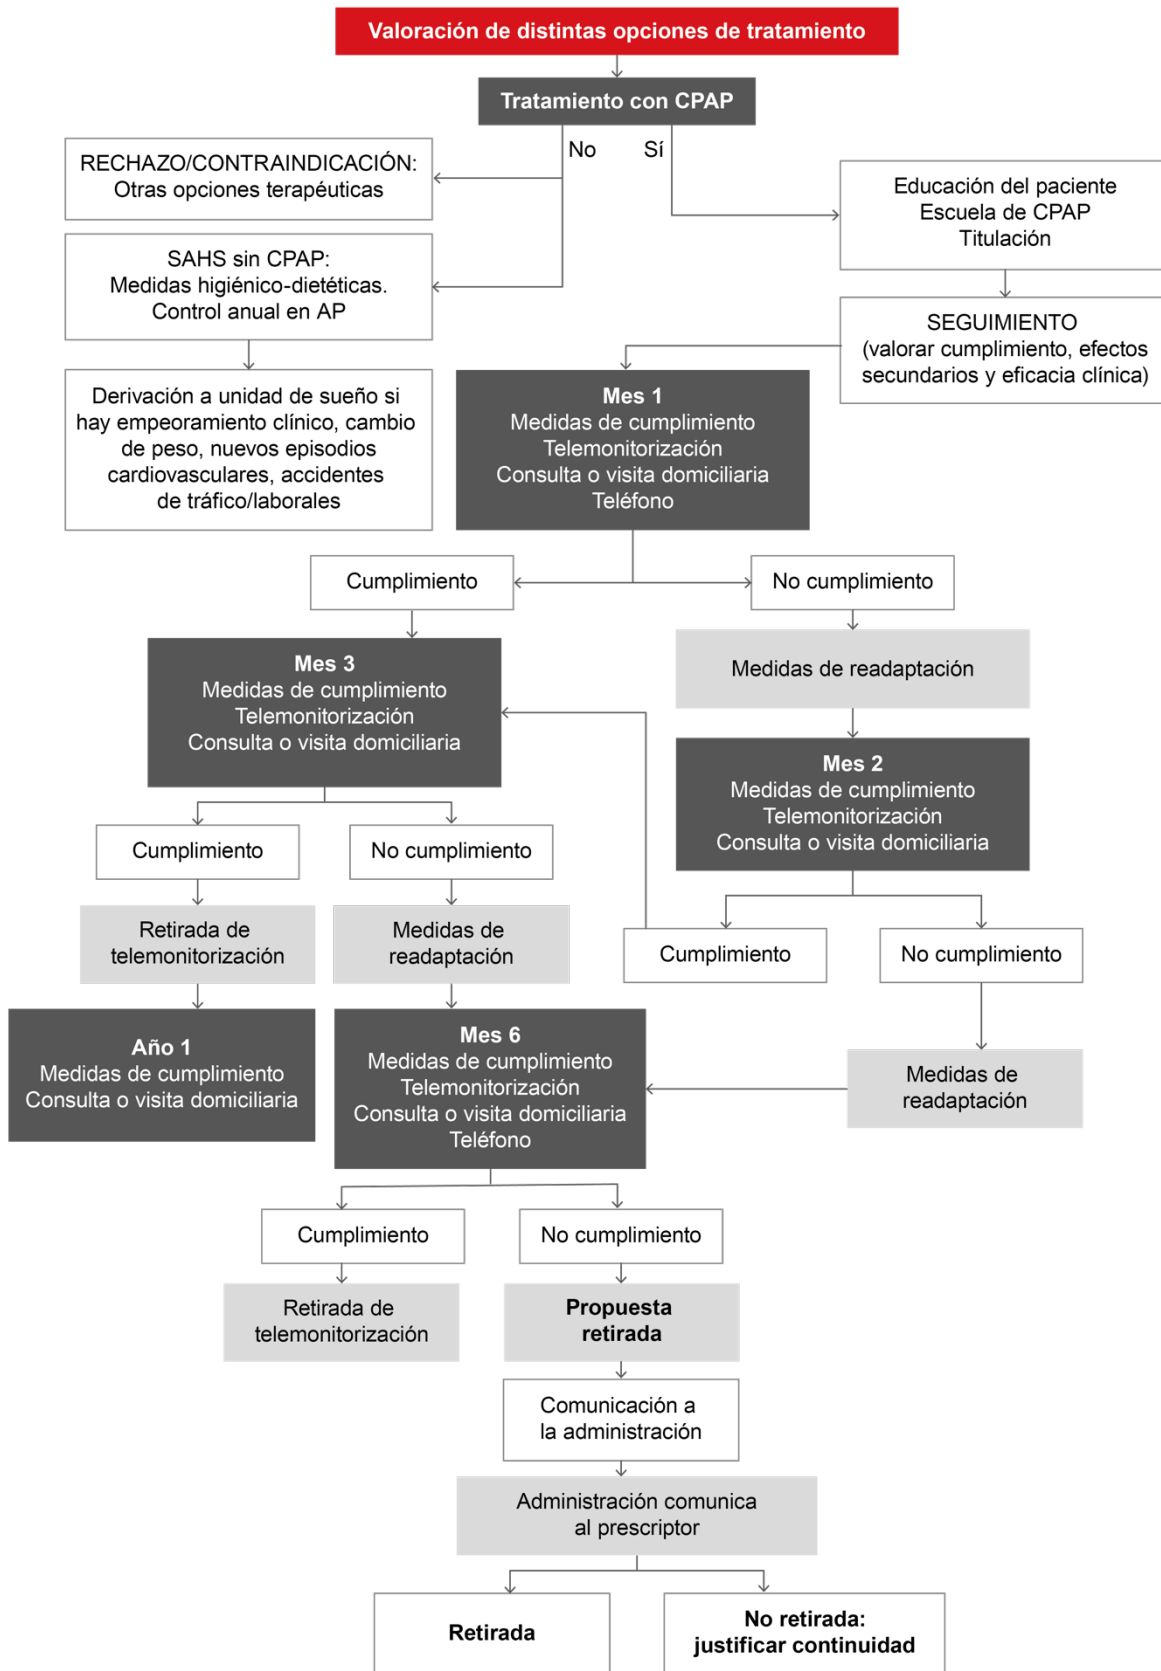

Se recomienda que todo paciente en tratamiento con CPAP sea controlado en el primer mes de tratamiento y se realice una revisión presencial mínima a los 6 meses. El control de la adherencia a los 3 meses, que puede efectuarse mediante telemonitorización, es un buen predictor del comportamiento a largo plazo<sup>72,73</sup>.

Si el tratamiento está bien establecido, sin efectos secundarios y con buena respuesta clínica, el paciente podrá ser derivado a atención primaria para continuar el seguimiento a partir del primer año. Es conveniente que sea revaluado en la unidad de sueño, al menos cada 5 años y siempre que se produzcan cambios clínicos como reaparición de síntomas, efectos secundarios no controlados, variaciones en el peso o comorbilidad asociada.

Los pacientes con AOS sin indicación de CPAP, que la rechazan o a los que se les retira por incumplimiento, también deben ser revisados de forma periódica para controlar el curso evolutivo de su enfermedad y ofrecer alternativas de tratamiento. Este seguimiento, que debería ser anual, debe ser realizado por el médico de atención primaria.

## **9. Cuándo retirar la CPAP**

Como con cualquier tratamiento, si una vez prescrita la CPAP el paciente presentara una franca y probada intolerancia, deberá considerarse su retirada. Resulta necesario diferenciar rechazo de intolerancia. El primero se refiere a la negativa del paciente a aceptar el tratamiento o cuando lo ha intentado durante un período inferior a 4 semanas sin conseguirlo. En estos casos es preciso garantizar que se ha explicado adecuadamente la indicación del tratamiento y se han intentado controlar los efectos secundarios. La intolerancia se define cuando el paciente ha intentado usar la CPAP durante más de 4 semanas, pero no ha conseguido adaptarse a ella. En ambas circunstancias, si no es posible reconducir la situación, deberán considerarse otras alternativas terapéuticas.

En caso de incumplimiento manifiesto, con un uso medio inferior a 3 h/noche, se debe incluir al paciente en un programa de cumplimiento, preferiblemente con un sistema de telemonitorización, y efectuar una nueva evaluación, transcurridos un mínimo de 3 meses, antes de valorar la posible retirada de la CPAP y la propuesta de un tratamiento alternativo. Ocasionalmente, pacientes que cumplen menos de 3 h/noche refieren mejorías sintomáticas, por lo que la decisión de suprimir el tratamiento con CPAP deberá ser individualizada.

## **10. Quiénes están autorizados a prescribir la CPAP**



La prescripción de CPAP debe ser realizada por un experto en medicina del sueño adscrito a una unidad del sueño, con objeto de garantizar un diagnóstico correcto y una precisa indicación de tratamiento y seguimiento del mismo.

La prescripción se realizará mediante el procedimiento y modelo normalizado que cada comunidad autónoma tenga establecido, siendo necesaria la generalización de sistemas informáticos para la prescripción, control y seguimiento de las terapias.

La prescripción será preferente en pacientes ingresados o de alto riesgo laboral, o de carácter normal en el resto de enfermos. El período de validez de la prescripción no debe ser inferior al año (con excepción de las pruebas de respuesta terapéutica) ni superior a 5 años.

## BIBLIOGRAFÍA:

1. Iftikhar IH, Kline CE, Youngstedt SD. Effects of exercise training on sleep apnea: A meta-analysis. *Lung* 2014;192(1):175-84. doi: 10.1007/s00408-013-9511-3.
2. Scrima L, Broudy M, Nay KN, Cohn MA. Increased severity of obstructive sleep apnea after bedtime alcohol ingestion: diagnosis potential and proposed mechanism of action. *Sleep* 1982;5(4):318-28. doi: 10.1093/sleep/5.4.318.
3. Wetter DW, Young TB, Bidwell TR, Badr MS, Palta M. Smoking as a risk factor for sleep disordered breathing. *Arch Intern Med* 1994;154(19):2219-24.
4. Dolly FR, Block AJ. Effect of flurazepan on sleep-disordered breathing and nocturnal oxygen desaturation in asymptomatic subjects. *Am J Med* 1982;73(2):239-43. doi: 10.1016/0002-9343(82)90185-1.
5. Smith PL, Gold AR, Meyers DA, Haponik EF, Bleecker ER. Weight loss in mildly to moderate obese patients with obstructive sleep apnea. *Ann Intern Med* 1985;103(6 Pt 1):850-5. doi: 10.7326/0003-4819-103-6-850.
6. Nerfeldt P, Nilsson BY, Mayor L, Uddén J, Rössner S, Friberg D. Weight reduction improves sleep, sleepiness and metabolic status in obese sleep apnoea patients. *Obes Res Clin Pract* 2008;2(4):I-II. doi: 10.1016/j.orcp.2008.08.001.
7. Chirinos JA, Gurubhagavatula I, Teff K, Rader DJ, Wadden TA, Townsend R, et al. CPAP, weight loss, or both for obstructive sleep apnea. *N Engl J Med* 2014;370(24):2265-75. doi: 10.1056/NEJMoa1306187.
8. Hudgel DW, Patel SR, Ahasic AM, Bartlett SJ, Bessesen DH, Coaker MA, et al. The role of weight management in the treatment of adult obstructive sleep apnea: an official American Thoracic Society clinical practice guideline. *Am J Respir Crit Care Med* 2018;198(6):e70-e87. doi: 10.1164/rccm.201807-1326ST.
9. Guardiano SA, Scott JA, Ware JC, Schechner SA. The long term results of gastric bypass on indexes of sleep apnea. *Chest* 2003;124(4):1615-9. doi: 10.1378/chest.124.4.1615.
10. Dixon JB, Schachter LM, O'Brien PE, Jones K, Grima M, Lambert G, et al. Surgical vs conventional therapy for weight loss treatment of obstructive sleep apnea: a randomized controlled trial. *JAMA* 2012;308(11):1142-9. doi: 10.1001/2012.jama.11580.
11. Feigel-Guiller B, Drui D, Dimet J, Zair Y, Le Bras M, Fuertes-Zamorano N, et al. Laparoscopic Gastric Banding in Obese Patients with Sleep Apnea: A 3-Year Controlled Study and Follow-up After 10 Years. *Obes Surg* 2015;25:1886-92.
12. Peromaa-Haavisto P, Tuomilehto H, Kössi J, Virtanen J, Luostarinen M, Pihlajamäki J, et al. Obstructive sleep apnea: the effect of bariatric surgery after 12 months: a perspective multicenter trial. *Sleep Med* 2017;35:85-90. doi: 10.1016/j.sleep.2016.12.017.
13. Kuczyński W, Gabryelska A, Mokros Ł, Białasiewicz P. Obstructive sleep apnea syndrome and hypothyroidism-merely concurrence or causal association. *Pneumonol Alergol Pol* 2016;84(5):302-6. doi: 10.5603/PiAP.2016.0038.

14. Sullivan CE, Issa FG, Berthon-Jones M, Eves L. Reversal of obstructive sleep apnoea by continuous positive airway pressure applied through the nares. *Lancet* 1981;1:862-5.
15. Isetta V, Montserrat JM, Santano R, Wimms AJ, Ramanan D, Woehrle H, et al. Novel approach to simulate sleep apnea patients for evaluating positive pressure therapy devices. *PLoS One* 2016;11(3):e0151530. doi: 10.1371/journal.pone.0151530.
16. Weaver TE, Mancini C, Maislin G, Cater J, Staley B, Landis JR, et al. Continuous positive airway pressure treatment of sleepy patients with milder obstructive sleep apnea: resultad of the CPAP apnea Trial North American Program (CATNAP) randomized clinical trial. *Am J Respir Crit Care Med* 2012;186(7):677-83. doi: 10.1164/rccm.201202-0200OC.
17. Amaro AC, Duarte FH, Jallad RS, Bronstein MD, Redline S, Lorenzi-Filho G. The use of nasal dilator strips as a placebo for trials evaluating continuous positive airway pressure. *Clinics (Sao Paulo)* 2012;67(5):469-74.
18. Barnes M, McEvoy RD, Banks S, Tarquinio N, Murray CG, Vowles N, et al. Efficacy of positive airway pressure and oral appliance in mid to moderate obstructive sleep apnea. *Am J Respir Crit Care Med* 2004;170(6):656-64. doi: 10.1164/rccm.200311-1571OC.
19. Effect of nasal continuous positive airway pressure treatment on blood pressure in patientes with obstructive sleep apnea. *Circulation* 2003;107(1):68-73. doi: 10.1161/01.cir.0000042706.47107.7a.
20. Hoyos CM, Killick R, Yee BJ, Phillips CL, Grunstein RR, Liu PY. Cardiometabolic changes after continuous positive airway pressure for obstructive sleep apnoea: a randomised sham-controlled study. *Thorax* 2012;67:1081-9.
21. Lam B, Sam K, Mok WY, Cheung MT, Fong DY, Lam JC, et al. Randomised study of three non-surgical treatments in mild to moderate obstructive sleep apnoea. *Thorax* 2007;62:354-9.
22. Monasterio C, Vidal S, Duran J, Ferrer M, Carmona C, Barbé F, et al. Effectiveness of continuous positive airway pressure in mild sleep apnea-hypopnea syndrome. *Am J Respir Crit Care Med* 2001;164:939-43.
23. Phillips CL, Yee BJ, Marshall NS, Liu PY, Sullivan DR, Grunstein RR. Continuous positive airway pressure reduces postprandial lipidemia in obstructive sleep apnea: a randomized, placebo-controlled crossover trial. *Am J Respir Crit Care Med* 2011;184:355-61.
24. Woodson BT, Steward DL, Weaver EM, Javaheri S. A randomized trial of temperature-controlled radiofrequency, continuous positive airway pressure, and placebo for obstructive sleep apnea syndrome. *Otolaryngol Head Neck Surg* 2003;128:848-61.
25. Ip MS, Tse HF, Lam B, Tsang KW, Lam WK. Endothelial function in obstructive sleep apnea and response to treatment. *Am J Respir Crit Care Med*. 2004;169(3):348-53. doi: 10.1164/rccm.200306-767OC.

26. Nguyen PK, Katikireddy CK, McConnell MV, Kushida C, Yang PC. Nasal continuous positive pressure improves myocardial perfusion reserve and endothelial-dependent vasodilation in patients with obstructive sleep apnea. *J Cardiovasc Magn Reson* 2010;12(1):50. doi: 10.1186/1532-429X-12-50.
27. Antic NA, Buchan C, Esterman A, Hensley M, Naughton MT, Rowland S, et al. A randomized controlled trial of nurse-led care for symptomatic moderate-severe obstructive sleep apnea. *Am J Respir Crit Care Med* 2009;179(6):501-8. doi: 10.1164/rccm.200810-1558OC. Epub 2009 Jan 8.
28. Craig SE, Kohler M, Nicoll D, Bratton DJ, Nunn A, Davies R, et al. Continuous positive airway pressure improves sleepiness but not calculated vascular risk in patients with minimally symptomatic obstructive sleep apnea: the MOSAIS randomised controlled trial. *Thorax* 2012;67(12):1090-6. doi: 10.1136/thoraxjnl-2012-202178.
29. Patil SP, Ayappa IA, Caples SM, Kimoff RJ, Patel SR, Harrod CG. Treatment of adult obstructive sleep apnea with positive airway pressure: an American Academy Of Sleep Medicine Systematic Review, a meta-analysis, and grade assessment. *J Clin Sleep Med* 2019;15(2):301-34. doi: 10.5664/jcsm.7638.
30. McEvoy RD, Antic NA, Heeley E, Luo Y, Ou Q, Zhang X, et al. CPAP for prevention of cardiovascular events in obstructive sleep apnea. *N Engl J Med* 2016;375(10):919-31. doi: 10.1056/NEJMoa1606599.
31. Patil SP, Ayappa IA, Caples SM, Kimoff RJ, Patel SR, Harrod CG. Treatment of adult obstructive sleep apnea with positive airway pressure: an American Academy Sleep Medicine Clinical Practice Guideline. *J Clin Sleep Med* 2019;15(2):335-43. doi: 10.5664/jcsm.7640.
32. Faccenda JF, Mackay TW, Boon NA, Douglas NJ. Randomized placebo-controlled trial of continuous positive airway pressure on blood pressure in the sleep apnea-hypopnea syndrome. *Am J Respir Crit Care Med* 2001;163(2):344-8. doi: 10.1164/ajrccm.163.2.2005037.
33. Arias MA, García-Río F, Alonso-Fernández A, Mediano O, Martínez I, Villamor J. Obstructive sleep apnea syndrome affects left ventricular diastolic function: effects of nasal continuous positive airway pressure in men. *Circulation*. 2005;112(3):375-83. doi: 10.1161/CIRCULATIONAHA.104.501841.
34. Drager LF, Bortolotto LA, Figueiredo AC, Krieger EM, Lorenzi GF. Effects of continuous positive airway pressure on early signs of atherosclerosis in obstructive sleep apnea. *Am J Respir Crit Care Med* 2007;176(7):706-12. doi: 10.1164/rccm.200703-500OC.
35. Bakker J, Campbell A, Neill A. Randomized controlled trial comparing flexible and continuous positive airway pressure delivery: effects on compliance, objective and subjective sleepiness and vigilance. *Sleep* 2010;33(4):523-9. doi: 10.1093/sleep/33.4.523.
36. Barbé F, Durán-Cantolla J, Capote F, de la Peña M, Chiner E, Masa JF, et al. Long-term effect of continuous positive airway pressure in hypertensive patients with sleep apnea. *Am J Respir Crit Care Med* 2010;181(7):718-26. doi: 10.1164/rccm.200901-0050OC.

37. Robinson GV, Smith DM, Langford BA, Davies RJ, Stradling JR. Continuous positive airway pressure does not reduce blood pressure in non-sleepy hypertensive OSA patients. *Eur Respir J* 2006;27(6):1229-35. doi: 10.1183/09031936.06.00062805.
38. Gottlieb DJ, Punjabi NM, Mehra R, Patel SR, Quan SF, Babineau DC, et al. CPAP versus oxygen in obstructive sleep apnea. *N Engl J Med* 2014;370:2276-85.
39. Martínez-García MA, Capote F, Campos-Rodríguez F, Lloberes P, Díaz de Atauri MJ, Somoza M, et al. Effect of CPAP on blood pressure in patients with obstructive sleep apnea and resistance hypertension: the HIPARCO randomized clinical trial. *JAMA* 2013;310(22):2407-15. doi: 10.1001/jama.2013.281250.
40. Marin JM, Carrizo SJ, Vicente E, Agustí AG. Long-term cardiovascular outcomes in men with obstructive sleep apnea-hypopnea with or without treatment with continuous positive airway pressure: an observational study. *Lancet* 2005;365(9464):1046-53. doi: 10.1016/S0140-6736(05)71141-7.
41. Campos-Rodríguez F, Martínez-García MA, Reyes-Núñez N, Caballero-Martínez I, Catalán-Serra P, Almeida-González CV, et al. Role of sleep apnea and continuous positive airway pressure therapy in the incidence of stroke or coronary heart disease in women. *Am J Respir Crit Care Med* 2014;189(12):1544-50. doi: 10.1164/rccm.201311-2012OC.
42. Muraja-Murro A, Kulkas A, Hiltunen M, Kupari S, Hukkanen T, Tiihonen P, et al. Adjustment of apnea-hypopnea index with severity of obstruction events enhances detection of sleep apnea patients with the highest risk of severe health consequences. *Sleep Breath* 2014;18:641-7.
43. Parra O, Sánchez-Armengol Á, Capote F, Bonnin M, Arboix A, Campos-Rodríguez F, et al. Efficacy of continuous positive airway pressure treatment on 5-year survival patients with ischaemic stroke and obstructive sleep apnea: a randomized controlled trial. *J Sleep Res* 2015;24(1):47-53. doi: 10.1111/jsr.12181.
44. Peker Y, Glantz H, Eulenburg C, Wegscheider K, Herlitz J, Thunström E. Effect of positive airway pressure on cardiovascular outcomes in coronary artery disease patients with nonsleepy obstructive sleep apnea. The RICCADSA Randomized controlled trial. *Am J Respir Crit Care Med* 2016;194(5):613-20. doi: 10.1164/rccm.201601-0088OC.
45. Sánchez-de-la-Torre M, Sánchez-de-la-Torre A, Bertran S, Abad J, Duran-Cantolla J, Cabriada V, et al. Effect of obstructive sleep apnoea and its treatment with continuous positive airway pressure on the prevalence of cardiovascular events in patients with acute coronary syndrome (ISAACC study): a randomised controlled trial. *Lancet Respir Med* 2020;8(4):359-67. doi: 10.1016/S2213-2600(19)30271-1.
46. Martínez-García MÁ, Chiner E, Hernández L, Cortes JP, Catalán P, Ponce S, et al. Obstructive sleep apnea in the elderly: role of continuous positive airway pressure treatment. *Eur Respir J* 2015;46(1):142-51. doi: 10.1183/09031936.00064214.

47. Chan KS, Aronson Friedman L, Bienvenu OJ, Dinglas VD, Cuthbertson BH, Porter R, et al. Distribution-based estimates of minimal important difference for hospital anxiety and depression scale and impact of event scale-revised in survivors of acute respiratory failure. *Gen Hosp Psychiatry* 2016;42:32-5. doi: 10.1016/j.genhosppsy.2016.07.004.
48. Dalmases M, Solé-Padullés C, Torres M, Embid C, Núñez MD, Martínez-García MÁ, et al. Effect of CPAP on cognitive, grain function, and structure among elderly patients with OSA: a randomized pilot study. *Chest* 2015;148(5):1214-23. doi: 10.1378/chest.15-0171.
49. Barbé F, Mayoralas LR, Duran J, Masa JF, Maimó A, Montserrat JM, et al. Treatment with continuous positive airway pressure is not effective in patients with sleep apnea but no daytime sleepiness: a randomised controlled trial. *Ann Intern Med* 2001;134(11):1015-23. doi: 10.7326/0003-4819-134-11-200106050-00007.
50. Engleman H, Martin S, Kingshott R, Mackay T, Deary I, Douglas N. Randomized placebo controlled reial of daytime function after continuous positive airway pressure (CPAP) therapy for the sleep apnea-hypopnea syndrome. *Thorax* 1998;53(5):341-5.
51. Engleman HM, Kingshott RN, Wraith PK, Mackay TW, Deary IJ, Douglas NJ. Randomized placebo-controlled crossover trial of continuous positive airway pressure for mild sleep apnea/hypopnea syndrome. *Am J Respir Crit Care Med* 1999;159(2):461-7. doi: 10.1164/ajrccm.159.2.9803121.
52. Terán-Santos J, Egea Santaolalla C, Montserrat JM, Masa Jiménez F, Librada Escribano MV, Mirabet E, et al. Sleep apnea and driving. Recommendations for interpreting Spanish regulations for Drivers. *Arch Bronconeumol* 2017;53(6):336-41. English, Spanish. doi: 10.1016/j.arbres.2016.11.007.
53. Young T, Peppard P, Palta M, Hla KM, Finn L, Morgan B, et al. Population-based study of sleep-disordered breathing as a risk factor for hypertension. *Arch Intern Med* 1997;157(15):1746-52. PMID: 9250236.
54. Ye L, Pien GW, Ratcliffe SJ, Björnsdottir E, Arnardottir ES, Pack AI, et al. The different clinical faces of obstructive sleep apnea: a cluster analysis. *Eur Respir J* 2014;44(6):1600-7. doi: 10.1183/09031936.00032314.
55. Schwarz EI, Puhon MA, Schlatzer C, Stradling JR, Kohler M. Effect of CPAP therapy on endothelial function in obstructive sleep apnoea: A systematic review and meta-analysis. *Respirology* 2015;20:889-95.
56. Kohler M, Craig S, Pepperell JCT, Nicoll D, Bratton DJ, Nunn AJ, et al. CPAP improves endothelial function in patients with minimally symptomatic OSA: results from a subset study of the MOSAIC trial. *Chest* 2013;144(3):896-902. doi: 10.1378/chest.13-0179.
57. Weinstock TG, Wang X, Rueschman M, Ismail-Beigi F, Aylor J, Babineau DC, et al. A controlled trial of CPAP therapy on metabolic control in individuals impaired glucose tolerance and sleep apnea. *Sleep* 2012;35(5):617-625B. doi: 10.5665/sleep.1816.

58. Pamidi S, Wroblewski K, Stepien M, Sharif-Sidi K, Kilkus J, Whitmore H , et al. Eight hours of nightly continuous positive airway pressure treatment of obstructive sleep apnea improves glucose metabolism in patients with prediabetes. A randomized controlled trial. *Am J Respir Crit Care Med* 2015;192(1):96-105. doi: 10.1164/rccm.201408-1564OC.
59. Lam JC, Lam B, Yao TJ, Lai AY, Ooi CG, Tam S, et al. A randomized controlled trial of nasal continuous positive airway pressure on insuline sensitivity in obstructive sleep apnea. *Eur Respir J* 2010;35(1):138-45. doi: 10.1183/09031936.00047709.
60. Iftikhar IH, Hoyos CM, Phillips CL, Magalang UJ. Metaanalysis of the association of sleep apnea with insulin resistance, and the effect of CPAP on HOMA-IR adiponectin and visceral adipose fat. *J Clin Sleep Med* 2015;11(4):475-85. doi: 10.5664/jcsm.4610.
61. Yang D, Liu Z, Yang H. The impact of effective continuous positive airway pressure on homeostasis model assessment insulin resistance in non-diabetic patients with moderate to severe obstructive sleep apnea. *Diabetes Metab Res Rev* 2012;28(6):499-504. doi: 10.1002/dmrr.2301.
62. Kushida CA, Littner MR, Morgenthaler T, Alessi CA, Bailey D, Coleman J Jr, et al. Practice parameters for the indications for polysomnography and related procedures: an update for 2005. *Sleep* 2005;28:499-521.
63. Lloberes P, Ballester E, Montserrat JM, Botifoll E, Ramírez A, Reolid A, et al. Comparison of manual and automatic CPAP titration in patients with sleep apnea/hipopnea syndrome. *Am J Respir Crit Care Med* 1996;154(6 Pt 1):1755-8. doi: 10.1164/ajrccm.154.6.8970366.
64. Sériès F. Is treatment of obstructive sleep apnea syndrome with auto-CPAP useful?. *Sleep* 2000;23 Suppl 4:S161-5.
65. Molina M, Hernández L, Durán J, Farré R, Rubio R, Navajas D, Montserrat JM. Protocolo para evaluar una CPAP automática. Valoración de la utilidad del autoset-T para determinar la presión de CPAP óptima en el síndrome de apnea-hipopnea del sueño (SAHOS). *Arch Bronconeumol* 2003;39(3):118-25. Spanish. doi: 10.1016/s0300-2896(03)75338-1.
66. Masa JF, Jiménez A, Durán J, Capote F, Monasterio C, Mayos M, et al. Alternative methods of titrating continuous positive airway pressure. A large multicenter study. *Am J Respir Crit Care Med* 2004;170(11):1218-24. doi: 10.1164/rccm.200312-1787OC.
67. Farré R, Montserrat JM, Rigau J, Trepát X, Pinto P, Navajas D. Response of automatic continuous positive airway pressure devices to different sleep breathing patterns: a bench study. *Am J Respir Crit Care Med* 2002;166(4):469-73. doi: 10.1164/rccm.2111050.
68. Antic NA, Catcheside P, Buchan C, Hensley M, Naughton MT, Rowland S, et al. The effect of CPAP in normalizing daytime sleepiness, quality of life, and neurocognitive function in patients with moderate to severe OSA. *Sleep* 2011;34(1):111-9. doi: 10.1093/sleep/34.1.111.

69. Weaver TE, Maislin G, Dinges DF, Bloxham T, George CF, Greenberg H. Relationship between hours of CPAP use and achieving normal levels of sleepiness and daily functioning. *Sleep* 2007;30(6):711-9. doi: 10.1093/sleep/30.6.711.
70. Weaver TE. Don't start celebrating--CPAP adherence remains a problem. *J Clin Sleep Med* 2013;9(6):551-2. doi: 10.5664/jcsm.2746.
71. C, E., 1998. Cumplimiento a largo plazo del tratamiento con CPAP en pacientes con síndrome de apneas-hipopneas durante el sueño. *Arch Bronconeumol* 1998;34(Supl 1):48.
72. McArdle N, Devereux G, Heidarnejad H, Engleman HM, Mackay TW, Douglas NJ. Long-term use of CPAP therapy for sleep apnea/hypopnea syndrome. *Am J Respir Crit Care Med* 1999;159(4 Pt 1):1108-14. doi: 10.1164/ajrccm.159.4.9807111.
73. Krieger J, Kurtz D, Petiau C, Sforza E, Trautmann D. Long-term compliance with CPAP therapy in obstructive sleep apnea patients and in snorers. *Sleep* 1996;19(9 Suppl):S136-43. doi: 10.1093/sleep/19.suppl\_9.s136.
74. Hudgel DW, Fung C. A long-term randomized, cross-over comparison of auto-titrating and standard nasal continuous airway pressure. *Sleep* 2000;23(5):645-8.
75. Nussbaumer Y, Bloch KE, Genser T, Thurnheer R. Equivalence of autoadjusted and constant continuous positive airway pressure in home treatment of sleep apnea. *Chest* 2006;129(3):638-43. doi: 10.1378/chest.129.3.638.
76. Meurice JC, Ingrand P, Portier F, Arnulf I, Rakotonanahari D, Fournier E, et al. A multicentre trial of education strategies at CPAP induction in the treatment of severe sleep apnoeahypopnoea syndrome. *Sleep Med* 2007;8(1):37-42. doi: 10.1016/j.sleep.2006.05.010.
77. Aloia MS, Smith K, Arnedt JT, Millman RP, Stanchina M, Carlisle C, et al. Brief behavioral therapies reduce early positive airway pressure discontinuation rates in sleep apnea syndrome: preliminary findings. *Behav Sleep Med* 2007;5(2):89-104. doi: 10.1080/15402000701190549.
78. Aloia MS, Arnedt JT, Strand M, Millman RP, Borrelli B. Motivational enhancement to improve adherence to positive airway pressure in patients with obstructive sleep apnea: a randomized controlled trial. *Sleep*. 2013 Nov 1;36(11):1655-62. doi: 10.5665/sleep.3120.
79. Chervin RD, Theut S, Bassetti C, Aldrich MS. Compliance with nasal CPAP can be improved by simple interventions. *Sleep* 1997;20(4):284-9. doi: 10.1093/sleep/20.4.284.
80. Wang W, He G, Wang M, Liu L, Tang H. Effects of patient education and progressive muscle relaxation alone or combined on adherence to continuous positive airway pressure treatment in obstructive sleep apnea patients. *Sleep Breath* 2012;16(4):1049-57. doi: 10.1007/s11325-011-0600-3.
81. Guralnick AS, Balachandran JS, Szutenbach S, Adley K, Emami L, Mohammadi M, et al. Educational video to improve CPAP use in patients with obstructive



- sleep apnoea at risk for poor adherence: a randomised controlled trial. *Thorax* 2017;72:1132-9.
82. Saraç S, Afşar GÇ, Oruç Ö, Topçuoğlu ÖB, Saltürk C, Peker Y. Impact of patient education on compliance with positive airway pressure treatment in obstructive sleep apnea.. *Med Sci Monit* 2017;23:1792-9. doi: 10.12659/msm.902075.
83. Budhiraja R, Parthasarathy S, Drake CL, Roth T, Sharief I, Budhiraja P, ET AL. early CPAP use identifies subsequent adherence to CPAP therapy. *Sleep*. 2007;30(3):320-4.
84. Gay P, Weaver T, Loubé D, Iber C. Evaluation of positive airway pressure treatment for sleep related breathing disorders in adults. *Sleep* 2006;29(3):381-401. doi: 10.1093/sleep/29.3.381.
85. Weaver TE, Grunstein RR. Adherence to continuous positive airway pressure therapy: the challenge to effective treatment. *Proc Am Thorac Soc* 2008;5(2):173-8. doi: 10.1513/pats.200708-119MG.
86. Aloia MS, Stanchina M, Arnedt JT, Malhotra A, Millman RP. Treatment adherence and outcomes in flexible vs standard continuous positive airway pressure therapy. *Chest* 2005;127(6):2085-93. doi: 10.1378/chest.127.6.2085.
87. Wozniak DR, Lasserson TJ, Smith I. Educational, supportive and behavioural interventions to improve usage of continuous positive airway pressure machines in adults with obstructive sleep apnoea. *Cochrane Database Syst Rev* 2014;(1):CD007736. 6.
88. Verbraecken J. Telemedicine applications in sleep disordererd breathins: thinking out of the box. *Sleep Med Clin* 2016;11(4):445-59. doi: 10.1016/j.jsmc.2016.08.007.
89. Farré R, Navajas D, Montserrat JM. Is telemedicine a key tool for improving continuous positive airway pressure adherence in patients with sleep apnea? *Am J Respir Crit Care Med* 2018;197(1):12-4. doi: 10.1164/rccm.201709-1791ED.
90. Mendelson M, Vivodtzev I, Tamisier R, Laplaud D, Dias-Domingos S, Baguet JP, et al. CPAP treatment supported by telemedicine does not improve blood pressure in high cardiovascular risk OSA patients: a randomized, controlled trial. *Sleep* 2014;37(11):1863-70. doi: 10.5665/sleep.4186.
91. Randerath W, Bassetti CL, Bonsignore MR, Farre R, Ferini-Strambi L, Grote L, et al. Challenges and perspectives in obstructive sleep apnoea: report by an ad hoc working group of the sleep disordererd breathing group of the european respiratory society and the european sleep research society. *Eur Respir J* 2018;52(3):1702616. doi: 10.1183/13993003.02616-2017.
92. Isetta V, Negrín MA, Monasterio C, Masa JF, Feu N, Álvarez A, et al. A bayesian cost-effectiveness analysis of a telemedicine-based strategy for the management of sleep apnoea: a multicentre randomised controlled trial. *Thorax* 2015;70(11):1054-61. doi: 10.1136/thoraxjnl-2015-207032.
93. Singh J, Badr MS, Diebert W, Epstein L, Hwang D, Karres V. American Academy of Sleep medicine Academy Position Paper for the Use of

- Telemedicine for the diagnosis and treatment of sleep disorders. *J Clin Sleep Med* 2015;11(10):1187-98. doi: 10.5664/jcsm.5098.
94. DeMolles DA, Sparrow D, Gottlieb DJ, Friedman R. A pilot trial of a telecommunications system in sleep apnea management. *Med Care* 2004;42:764-9.
95. Sparrow D, Aloia M, Demolles DA, Gottlieb DJ. A telemedicine intervention to improve adherence to continuous positive airway pressure: a randomised controlled trial. *Thorax* 2010;65(12):1061-6. doi: 10.1136/thx.2009.133215.
96. Munafo D, Hevener W, Crocker M, Willes L, Sridasome S, Muhsin M. A telehealth program for CPAP adherence reduces labor and yields similar adherence and efficacy when compared to standard of care. *Sleep Breath* 2016;20:777-85.
97. Kuna ST, Shuttleworth D, Chi L, Schutte-Rodin S, Friedman E, Guo H, et al. Web-based access to positive airway pressure usage with or without an initial financial incentive improves treatment use in patients with obstructive sleep apnea. *Sleep* 2015;38(8):1229-36. doi: 10.5665/sleep.4898.
98. Stepnowsky C, Edwards C, Zamora T, Barker R, Agha Z. Patient perspective on use of an interactive website for sleep apnea. *Int J Telemed Appl* 2013;2013:239382.
99. Montserrat Canal JM, Suárez-Girón M, Egea C, Embid C, Matute-Villacís M, de Manuel Martínez L, et al. Spanish Society of Pulmonology and Thoracic Surgery positioning on the use of telemedicine in sleep-disordered breathing and mechanical ventilation. *Arch Bronconeumol* 2020;S0300-2896(20)30190-3. doi: 10.1016/j.arbres.2020.05.032.
