# Supplementary material
Source: Elsevier journal article supplement (https://www.sciencedirect.com/science/article/pii/S0300289621001150)
Supplement: mmc8 [file S0300289621001150:mmc8.pdf]

## 2.4.C Tratamiento quirúrgico de la Apnea Obstructiva del Sueño.

**Nicolás González Mangado** (editor). Jefe de Servicio de Neumología. Director de la Unidad Multidisciplinar de Sueño (UMS). Fundación Jiménez Díaz. Instituto Investigación Sanitaria FJD. Madrid. Centro de Investigación Biomédica en Red de Enfermedades Respiratorias (CIBERES), Madrid, España.

**Guillermo Plaza Mayor**. Jefe del Servicio de Otorrinolaringología. Hospital Universitario de Fuenlabrada. Universidad Rey Juan Carlos. Hospital La Zarzuela. Madrid. España.

**Lourdes Maniegas Lozano**. Facultativo Especialista en Cirugía Oral y Maxilofacial. Fundación Jiménez Díaz. Madrid.

**Carmen Carmona Bernal**. Facultativo Especialista en Neumología. Unidad de Trastornos Respiratorios del Sueño de la Unidad Médico-Quirúrgica de Enfermedades Respiratorias. Hospital Universitario Virgen del Rocío. Sevilla.

### 1. Introducción

Todas las opciones terapéuticas, quirúrgicas, médicas o físicas en el tratamiento de la apnea obstructiva del sueño (AOS) deben ser complementarias y no excluyentes. Se debe ofrecer a cada paciente el abanico más amplio de posibilidades y la utilización racional de todas ellas, ya sean aisladas o en combinación y adaptadas a cada caso, después de un estudio en profundidad del paciente. Nunca la indicación quirúrgica excluye definitivamente otros tratamientos, ni a la inversa. Esta debe ser la norma en el trabajo multidisciplinario (**Figura 1**).

**Figura 1.** Abordaje multidisciplinario de la apnea obstructiva del sueño (AOS): todo es complementario, nada excluyente. CPAP: presión positiva continua en las vías respiratorias DISE: *drug-induced sleep endoscopy*; VAS: vía aérea superior.

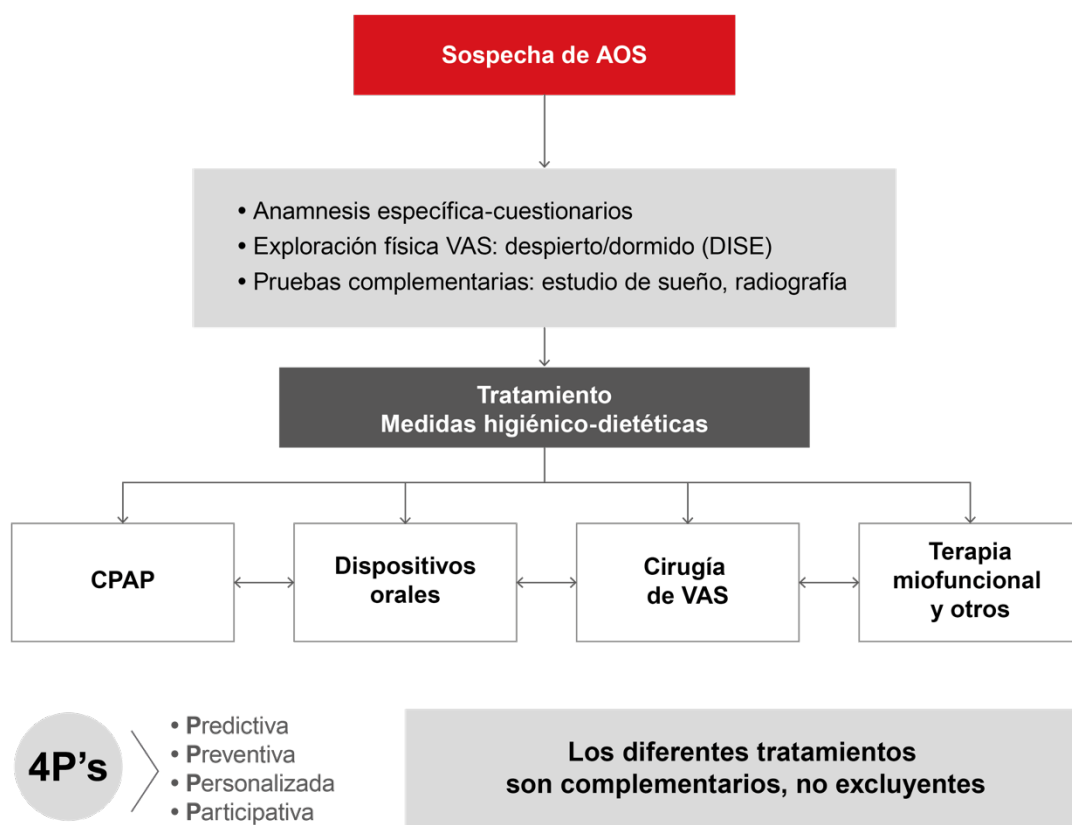

Así, el nuevo algoritmo terapéutico de la AOS busca la precisión y la excelencia en la selección del paciente, la selección del procedimiento a realizar y su eficiente realización<sup>1</sup>.

## 2. Diagnóstico

A la hora de seleccionar la técnica quirúrgica, es fundamental para el cirujano realizar un diagnóstico preciso y establecer los puntos de mayor estrechamiento de la vía aérea superior (VAS). En la actualidad disponemos de dos herramientas fundamentales para el diagnóstico topográfico de la AOS:

### 1) Exploración física en la consulta y bajo sueño inducido (DISE)

Una vez sospechada la AOS, y especialmente tras su confirmación mediante polisomnografía (PSG) o poligrafía respiratoria (PR), es necesaria una completa exploración de la VAS para realizar un diagnóstico topográfico de la enfermedad, siendo recomendable que esta sea efectuada por un otorrinolaringólogo mediante videofibroscopio transnasal<sup>2</sup>.

En la recientemente publicada Guía de Práctica Clínica de la exploración de la VAS para pacientes adultos con sospecha de AOS se constata que, además de los datos antropométricos y el morfotipo facial, en los que el cirujano maxilofacial puede ser de gran apoyo, la exploración de la VAS en la consulta de otorrinolaringología sobre el paciente despierto debe incluir craneocaudalmente la evaluación desde la cavidad oral y la válvula nasal hasta la glotis, mediante exploración con fotóforo y videofibroscopio,

que detalle el estado de las fosas nasales, la rinofaringe, la orofaringe (frenillo lingual, amígdalas y paladar blando), la base de la lengua, la hipofaringe y la laringe<sup>2</sup>. Es recomendable el uso sistemático de escalas estandarizadas para poder comparar resultados, como las propuestas por Friedman, tanto para el paladar, las amígdalas o la base de lengua<sup>3</sup>.

En algunos pacientes con AOS, especialmente tras el fracaso o la intolerancia a tratamientos médicos y/o quirúrgicos, es muy útil completar el diagnóstico topográfico con una exploración dinámica de la VAS con el paciente bajo sueño inducido, conocida como somnoscopia o DISE (*drug induced sleep endoscopy*)<sup>4,5</sup>.

Tanto en la recientemente publicada Guía de Práctica Clínica sobre DISE<sup>4</sup> como en la revisión sistemática publicada por Certal y cols.<sup>5</sup> se profundiza en la utilidad y seguridad de la DISE en la AOS. Sobre un total de 535 pacientes con AOS, el tratamiento quirúrgico varió tras los hallazgos de la DISE en el 50% de los casos, especialmente en hipofaringe y laringe.

En 1978, Borowieki y cols.<sup>6</sup> publicaron el estudio fibroendoscópico de la VAS de los pacientes con AOS mientras dormían. No obstante, explorar la VAS del paciente dormido espontáneamente tiene tantas dificultades que resulta impracticable. Para obviar este problema, en 1991, Croft y Pringle<sup>7</sup> tuvieron la idea de realizar la exploración de la VAS con un endoscopio durante el sueño inducido con midazolam. Así nació la DISE. Al provocar un sueño farmacológicamente, los pacientes pueden tolerar el fibroendoscopio sin despertarse, se puede realizar en un horario cómodo durante la jornada laboral, y visualizar la VAS mientras el paciente duerme, complementando así nuestra exploración del paciente despierto. Además, permite efectuar maniobras para comprobar la utilidad de los dispositivos intraorales o la terapia posicional<sup>5</sup>.

Han sido publicados numerosos trabajos sobre la seguridad de la DISE, su validez comparada con el sueño natural, la metodología necesaria y su utilidad diagnóstica y pronóstica, que se han resumido en el *manuscrito de posición* europeo, que lleva ya dos ediciones publicadas<sup>8,9</sup>, y que recomienda el uso de la clasificación VOTE para su evaluación y descripción de los hallazgos<sup>10</sup>.

En el metaanálisis de Dijemeni y cols.<sup>11</sup> se observa una gran heterogeneidad en la descripción de los hallazgos de la DISE, recomendándose la adopción de una misma clasificación para todos los autores, tal como dice el *manuscrito de posición* europeo. Esta clasificación se encuentra disponible y consensuada en la reciente edición del consenso europeo<sup>9</sup>.

Mediante la DISE, aunque no se dispone de ensayo clínico aleatorio (ECA)<sup>12</sup>, diversos trabajos longitudinales han mostrado que es posible llegar a un diagnóstico de los

lugares obstructivos o colapsos de la VAS que más influyan en el desarrollo de las apneas de los pacientes, analizando el nivel (velo de paladar, orofaringe, lengua, epiglotis) y tipo de colapso (anteroposterior, lateral o circular) (**Figuras 2 a 5**). Así, la DISE puede dirigir el tratamiento quirúrgico de forma específica a los colapsos predominantes en cada caso<sup>13-17</sup>.

**Figura 2.** *Izquierda:* colapso anteroposterior del paladar. *Derecha:* colapso orofaríngeo lateral.

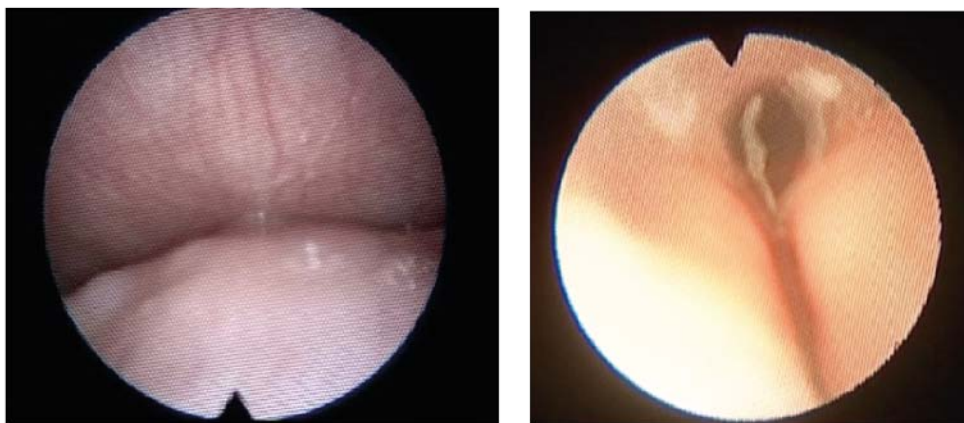

**Figura 3.** Colapso circular del paladar.

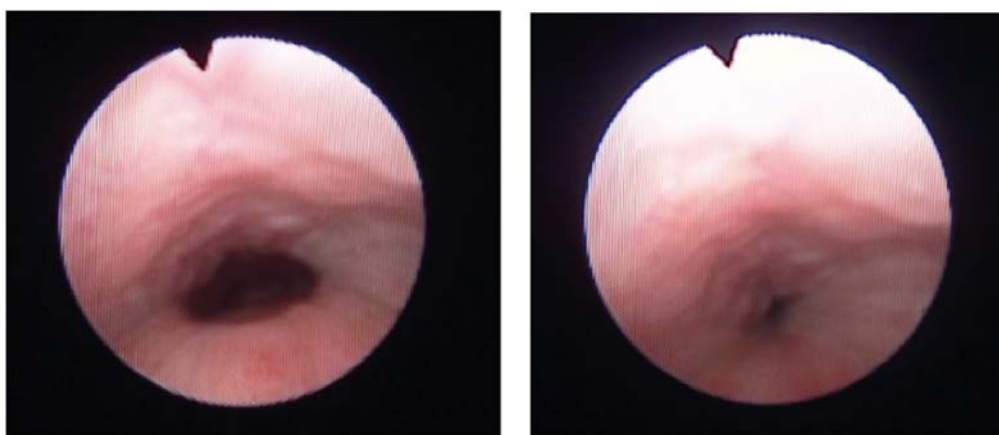

**Figura 4.** *Izquierda:* colapso de epiglotis (en puerta batiente). *Derecha:* colapso de la base de la lengua por hipertrofia de amígdala lingual.

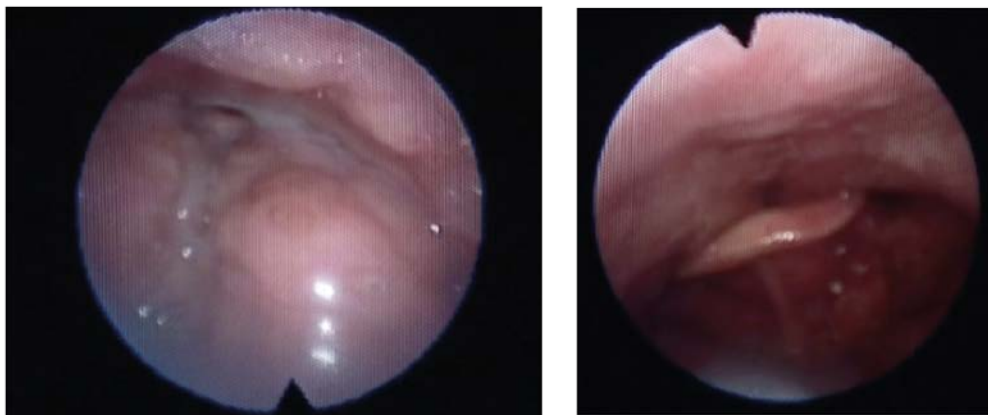

**Figura 5.** Ejemplos de colapsos durante DISE. VAS: vía aérea superior. (Enlace a vídeos por cortesía del Dr. Peter Baptista.)

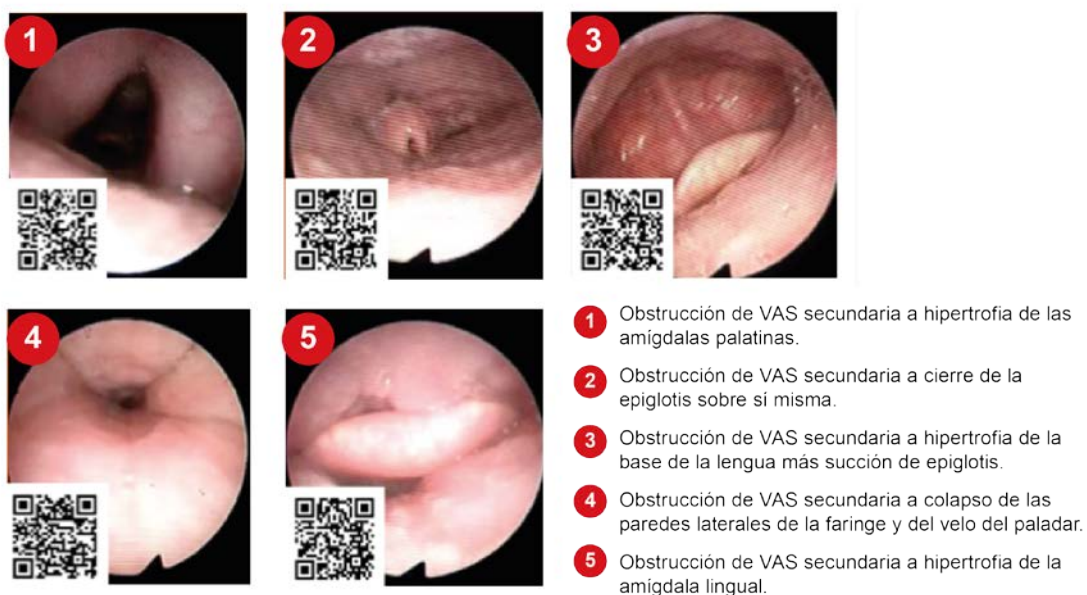

Por un lado, la DISE es útil para establecer un plan quirúrgico. Así, Eichler y cols.<sup>13</sup> observaron que los hallazgos en la DISE eran motivo de cambio de indicación quirúrgica o de dispositivos de avance mandibular (DAM) cuando se objetivaron colapsos en paladar, hipofaringe y laringe, pero no en amígdalas. La DISE cambió la indicación terapéutica en el 67% de los 97 pacientes estudiados. De forma similar, Fernández-

Julián y cols.<sup>14</sup>, en una muestra de 162 pacientes, observaron una correlación significativa entre la exploración en consulta y los hallazgos de la DISE en los colapsos velofaríngeos, mientras que la DISE cambiaba la indicación quirúrgica en > 40% de los casos en las obstrucciones hipofaríngeas y laríngeas. Por su parte, Zerpa Zerpa y cols.<sup>15</sup> describieron los hallazgos en DISE en una muestra de 138 pacientes, observando igualmente cómo la DISE aumenta el diagnóstico de colapsos en la hipofaringe del 28% al 69%. En un reciente metaanálisis de Lee y cols.<sup>16</sup>, sobre un total de 2.950 pacientes de 19 estudios, un 51,6% de los pacientes con AOS tienen obstrucción en hipofaringe y un 34,3% en epiglotis, siendo multinivel en el 47,5% de los casos.

Por otra parte, el tipo de colapso puede ser un factor pronóstico del resultado del tratamiento. Así, Wang y cols.<sup>17</sup> han publicado una serie de 85 pacientes adultos con AOS que fueron operados de uvulopalatofaringoplastia/amigdalectomía, observando que, cuando la DISE objetivó un colapso circunferencial, el éxito quirúrgico es menor significativamente.

Existe abundante literatura que confirma la utilidad de la DISE en el diagnóstico de la AOS y que además justifica su uso para mejorar la indicación de DAM, terapias posicionales o cirugías de la VAS, siendo una herramienta muy útil para facilitar al paciente la elección de la opción terapéutica más adecuada en su caso<sup>5,8,9</sup>.

En la actualidad, para indicar el tratamiento con presión positiva continua en la vía respiratoria (CPAP) o DAM no hay evidencia que justifique hacer una DISE previa. Por tanto, se pueden establecer las siguientes indicaciones actuales de la DISE<sup>18</sup>

1. En pacientes con AOS cuando se está evaluando qué tratamiento de la AOS elegir: cirugía de VAS, estimulación del nervio hipogloso, terapia posicional o combinaciones de ellos.
2. Pacientes con AOS que no aceptan o toleran la CPAP.
3. Pacientes con AOS refractarios a CPAP bien tolerada para plantear terapias alternativas.
4. Pacientes en que ha fracasado el tratamiento quirúrgico de la AOS o los DAM no son eficaces.

El trabajo multicéntrico con mayor tamaño muestral sobre la utilidad de la DISE ha sido recientemente publicado por Green y cols.<sup>19</sup>. Un total de 275 pacientes procedentes de 14 centros fueron incluidos. En la AOS, el hallazgo de colapsos orofaríngeos de pared lateral se asoció a una menor tasa de éxito quirúrgico (*odds ratio* [OR]: 0,51; intervalo de confianza [IC] del 95%: 0,27-0,93), mientras que solo en AOS grave el hallazgo de colapsos completos en la base de la lengua se asoció a una menor tasa de éxito quirúrgico (OR: 0,52; IC del 95%: 0,28-0,98).

Sin embargo, algunos autores muestran la necesidad de sistematizar más los hallazgos para evitar sobrediagnósticos con colapsos multinivel<sup>12</sup>. Blumen y cols.<sup>20</sup>, en un estudio retrospectivo sobre 24 pacientes con AOS, observaron que el éxito quirúrgico no siempre venía determinado por los hallazgos observados en la DISE preoperatoria. De hecho, en 8 de los 14 casos que cumplían los criterios de éxito, algunos de los sitios que la DISE había marcado como colapsos tratables no habían sido tratados finalmente, lo que no había empañado dicho éxito. Para estos autores es necesario interpretar con cautela los colapsos multinivel objetivados en la DISE antes de indicar el tratamiento quirúrgico. Más recientemente, Pang y cols.<sup>21</sup> han publicado un estudio multicéntrico prospectivo no aleatorizado sobre 326 pacientes con AOS a los que se indicaba tratamiento quirúrgico usando la DISE como herramienta de selección (170 pacientes) o no (156 pacientes). En este estudio, el uso de la DISE no supuso mayor tasa de éxito quirúrgico: la reducción media del índice de apnea-hipopnea (IAH) fue desde 32,6 (DE: 18,8) a 15,9 (DE: 12,6) usando la DISE, y de 33,7 (DE: 19,6) a 13,2 (DE: 8,8).

## 2) Pruebas de imagen en la AOS

La **telerradiografía** está indicada como herramienta de aproximación a la anatomía del paciente y a la detección de posibles alteraciones de la VAS. Esta prueba de imagen, que consiste en una proyección lateral del cráneo, nos permite realizar un **estudio cefalométrico** consistente en mediciones lineales y angulares entre diferentes estructuras y espacios aéreos, así como detectar alteraciones anatómicas. Las más importantes incluyen el estrechamiento del espacio aéreo posterior ( $< 8$  mm), el posicionamiento inferior del hioides ( $> 20$  mm al plano mandibular), el paladar blando hipertrófico y la retroposición mandibular ( $SNB < 80^\circ$ ).

En el metaanálisis de Neelapu y cols.<sup>22</sup> se encontraron diferencias significativas en los siguientes parámetros: altura facial anterior, posición del hueso hioides y espacio aéreo posterior, así como en mediciones en relación con la base craneal, posición y longitud de la mandíbula, longitud del maxilar superior, lengua y paladar blando y longitud de la VAS. Este metaanálisis apoya la relación directa entre AOS y deformidad dentofacial, y confirma una fuerte evidencia entre la reducción del espacio posterior de la VAS, la posición del hueso hioides descendida y el aumento de la altura facial en pacientes con AOS en relación con sujetos sanos.

La **resonancia magnética** es la prueba de elección en niños dada la ausencia de radiación. Permite obtener imágenes tridimensionales de las estructuras de la VAS y diferenciar entre contenido graso y acuoso. Se ha demostrado que en los pacientes con AOS los depósitos de grasa faríngeos están aumentados y que se localizan en los laterales de la faringe, haciendo que la forma seccional de la misma difiera de la de los pacientes sanos: en ambos casos es elíptica, lo que varía es el eje mayor, siendo transversal en los individuos sanos y sagital en los pacientes con AOS (por lo tanto, de menor tamaño). Esto se correlaciona de forma directa con la gravedad<sup>23</sup>.

En la actualidad, el gran avance en el diagnóstico y en la programación quirúrgica lo constituye la **tomografía computarizada (TC)**, en especial la de haz cónico (tecnología *ConeBeam*, CBCT). Esta última técnica permite una precisa evaluación anatómica y está validada para establecer parámetros volumétricos y áreas seccionales en el espacio aéreo posterior. Sus prestaciones son superiores a las de otros escáneres convencionales, tanto por calidad de imagen como por el tiempo empleado, dosis de radiación recibida (un 10-30% menos de radiación que una TC convencional) y posición del paciente. Son muy útiles en la planificación quirúrgica gracias a los *software* de planificación 3D<sup>24</sup> y para el seguimiento pre y postoperatorio de los avances bimaxilares (*Figuras 6 y 7*)<sup>25</sup>.

**Figura 6.** Imágenes coroneales de *ConeBeam* donde se mide el volumen de la vía aérea y el área seccional de mayor estrechamiento de la misma, antes y después de la cirugía.

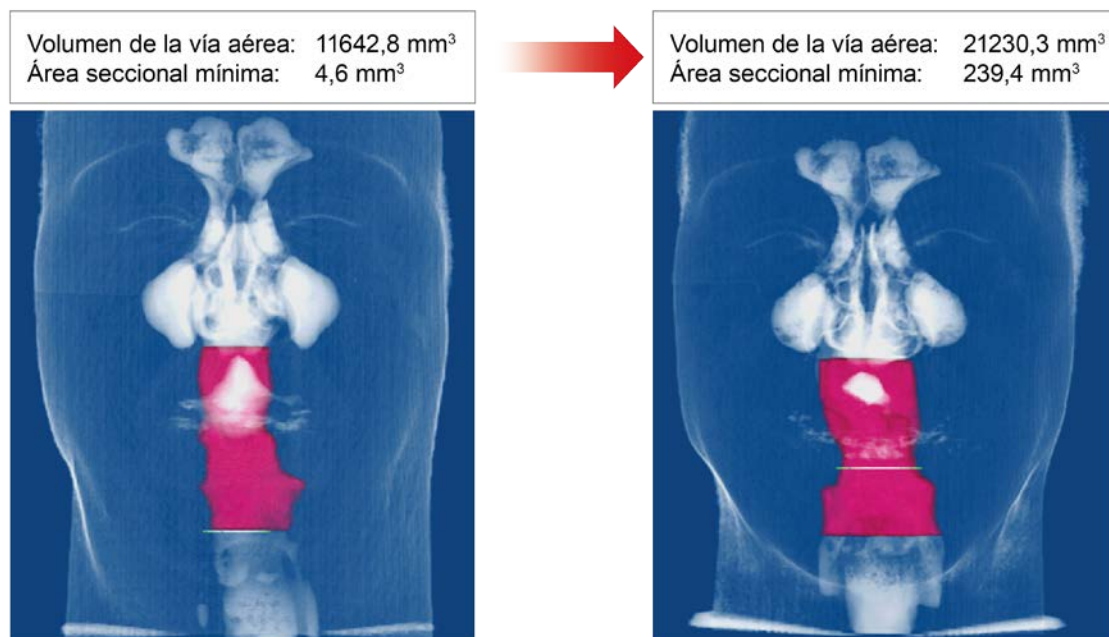

**Figura 7.** Cortes sagitales con las mismas mediciones.

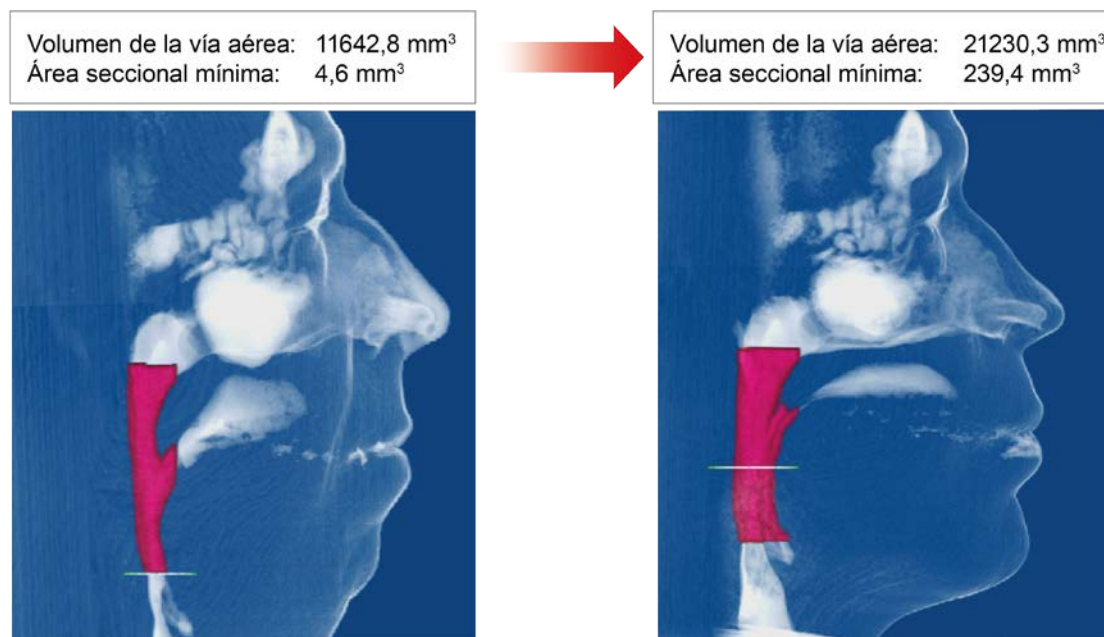

## Tratamiento quirúrgico de la AOS

### Consideraciones iniciales

La intervención quirúrgica en los pacientes con AOS trata de reducir la colapsabilidad de la VAS durante el sueño, mitigando la hipoxemia, los episodios respiratorios y normalizando la arquitectura del sueño. El éxito de la cirugía va a depender de la correcta selección del paciente, basándonos en la exploración física y en los estudios diagnósticos.

Una vez establecido el diagnóstico de la AOS, y evaluada su gravedad clínica y polisomnográfica, es posible realizar diferentes tratamientos quirúrgicos, cuya indicación dependerá de la localización topográfica del colapso, evidenciada durante la exploración en consultas, e idealmente confirmada mediante DISE.

Aunque en muchas ocasiones la cirugía de la AOS puede plantearse como un tratamiento curativo, en general debe considerarse como una herramienta más en el tratamiento multidisciplinario de la enfermedad. Por otro lado, no debe relegarse al último escalón terapéutico, sino utilizarse como un arma más, en combinación con otros tratamientos no invasivos, buscando una medicina más precisa y personalizada<sup>1,26</sup>.

El algoritmo quirúrgico que los otorrinolaringólogos y cirujanos orales y maxilofaciales podemos aplicar en el momento actual sería una actualización del clásico modelo de dos fases de Stanford (**Figura 8**)<sup>1,25</sup>. En el modelo clásico, los pacientes con AOS eran tratados con la fase II, avance bimaxilar, solo tras el fracaso de la fase I, de forma

secundaria. Sin embargo, en el momento actual, en la era de medicina personalizada, podemos ofrecer inicialmente cirugías palatinas y orofaríngeas de forma precisa, en función de los hallazgos clínicos y de DISE, pero también debemos indicar cirugía esquelética, especialmente avances bimaxilares, como tratamiento quirúrgico inicial de la AOS, si los hallazgos así lo recomiendan: en pacientes con AOS grave con IAH > 65 y/o colapso concéntrico en la DISE y/o alteraciones dentofaciales graves.

**Figura 8.** Algoritmo de indicación del tratamiento quirúrgico de la apnea obstructiva del sueño (AOS) siguiendo la medicina precisa y personalizada. (Modificado de referencias 1 y 25.) CELL: *coblator endoscopic endoscopic lingual lightening*; CPAP: *presión positiva continua en las vías respiratorias*; DAM: *dispositivo de avance mandibular*; DISE: *drug-induced sleep endoscopy*; DOME: *distraction osteogenesis maxillary expansión*; PR: *poligrafía respiratoria*; PSG: *polisomnografía*; Rx/TC: *estudios radiológicos*; TORS: *cirugía robótica transoral*; UPPP: *uvulopalatofaringoplastia*; VAS: *vía aérea superior*. NOTAS: 1. Si hay alteraciones dentofaciales graves, puede indicarse de forma directa un avance bimaxilar, si bien la CPAP será prescrita hasta la cirugía. 2. Si hay hipertrofia amigdalal de grado 3-5, puede indicarse de forma directa una amigdalectomía, si bien la CPAP será prescrita hasta la cirugía. 3. Si hay intolerancia a la CPAP, tras evaluación ORL, se recomienda cirugía nasal lo antes posible para mejorar dicha intolerancia y retitular la CPAP. 4. Si hay intolerancia a la CPAP, tras evaluación odontológica/maxilofacial, se recomienda adaptar DAM o valorar cirugía ortodóncica. 5. Si hay intolerancia a la CPAP, tras evaluación ORL, se recomienda DISE para determinar el tratamiento más adecuado de la VAS. 6. Tras intolerancia a la CPAP y fracaso de otras cirugías, se recomienda nueva DISE. Si el colapso no es concéntrico, se podrá indicar la neuroestimulación del hipogloso.

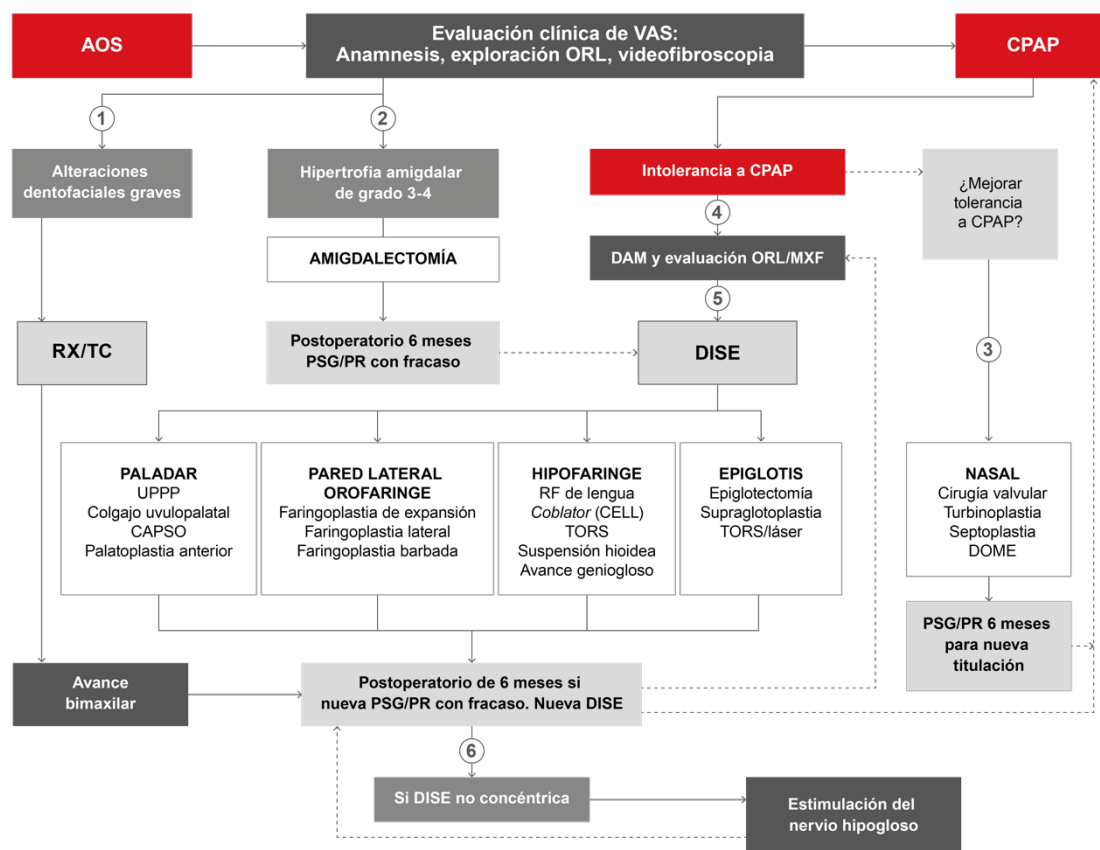

Este algoritmo huye del concepto clásico de cirugía de continente y contenido. Divide los procedimientos quirúrgicos a realizar según el órgano afectado y se basa fundamentalmente en los hallazgos exploratorios y diagnósticos para la elección del procedimiento, así como en la decisión final del paciente una vez expuestas todas las opciones, no siendo ninguna excluyente ni prevalente. Lo habitual es que cada paciente presente obstrucciones de la VAS a distintos niveles, por eso la tendencia actual es a realizar una CIRUGÍA MULTINIVEL, en la que, una vez diagnosticados los distintos puntos de obstrucción de la VAS, se deciden los diferentes procedimientos a realizar, solos o combinados, para lograr un resultado óptimo.

Otra variable a considerar en la actualidad son las preferencias de cada paciente, adaptando la medicina de forma personalizada. Para ello, podemos tener entre nuestro catálogo de cirugías procedimientos poco invasivos, habitualmente menos efectivos, o más invasivos, asociados a una mayor efectividad (Figuras 9 y 10). En muchas ocasiones podremos combinar diferentes tratamientos más o menos invasivos con tratamientos no quirúrgicos, como la terapia posicional o la terapia miofuncional.

**Figura 9.** Tratamientos quirúrgicos de la apnea obstructiva del sueño en función de la deformidad anatómica objetivada en la exploración de la VAS o en la DISE, y clasificados según grado de invasividad para cirugía nasal y amigdalal.

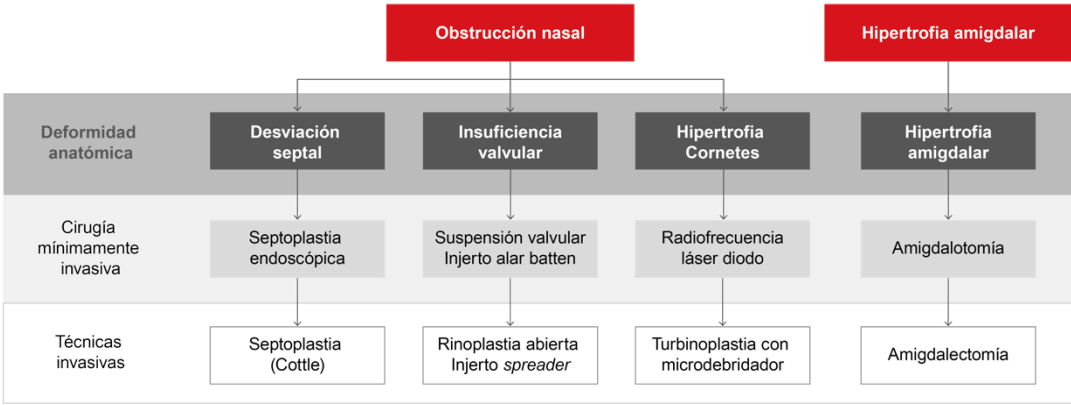

**Figura 10.** Tratamientos quirúrgicos de la apnea obstructiva del sueño en función de la deformidad anatómica objetivada en la exploración de la VAS o en la DISE, y clasificados según grado de invasividad para cirugía palatofaríngea y lingual. CELL: *coblator endoscopic lingual lightening*; RF: radiofrecuencia; TORS: cirugía robótica transoral; UPPP: uvulopalatofaringoplastia.

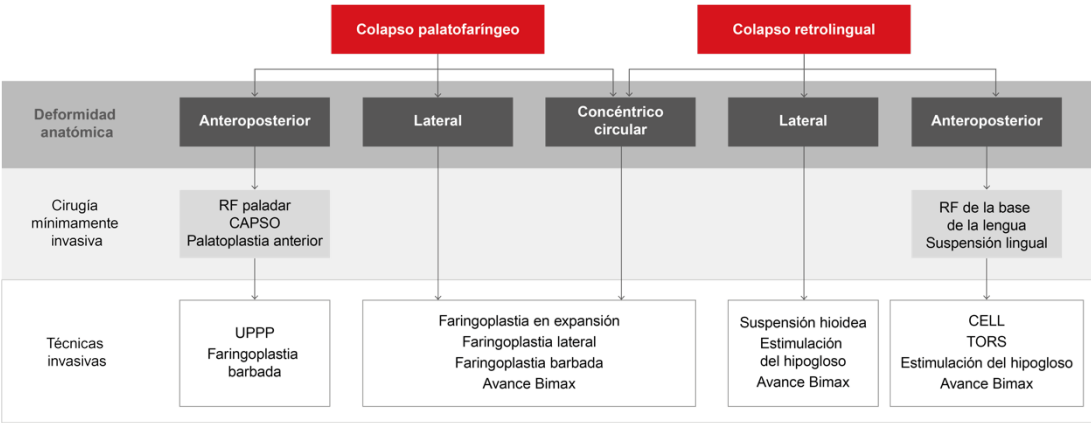

Por otra parte, en la evaluación de la respuesta terapéutica tras el tratamiento quirúrgico de la AOS, además de una potencial reducción del IAH, como se describe en los criterios de Sher<sup>27</sup>, se da mayor relevancia a otras mediciones como la mejoría en la escala de somnolencia de Epworth (ESS) o en otras escalas de calidad de vida; a parámetros oximétricos como el índice de desaturación de oxígeno; a parámetros cardiovasculares, como la frecuencia cardíaca o la presión arterial, o incluso a la supervivencia, para caracterizar la gravedad de la enfermedad y la respuesta a los diferentes tratamientos<sup>28-30</sup>.

Finalmente, debemos tener presente que en la actualidad existen numerosos estudios de calidad sobre estos tratamientos quirúrgicos de la AOS, analizados a su vez en diversos metaanálisis, que avalan su indicación, que han sido resumidos por Camacho y cols.<sup>31</sup> (Tabla 1).

**Tabla 1.** Resumen de metaanálisis publicados sobre tratamiento quirúrgico de la AOS en adultos. CPAP: presión positiva continua en la vía respiratoria; ESS: escala de somnolencia de Epworth; IAH: índice de apnea-hipopnea; IC: intervalo de confianza; LAUP: uvuloplastia asistida por láser; LSAT: saturación mínima de oxígeno; NR: no registrado; RDI: índice de dificultad respiratoria; UPPP: uvulopalatofaringoplastia.

| Autor y año    | Tipo de tratamiento               | N              | Preop IAH                                                                                                                                                                                                                    | Postop IAH          | % cambio IAH               | Preop LSAT           | Postop LSAT         |
|----------------|-----------------------------------|----------------|------------------------------------------------------------------------------------------------------------------------------------------------------------------------------------------------------------------------------|---------------------|----------------------------|----------------------|---------------------|
| Riaz 2015      | Provent                           | 920            | 27,3 ± 22,2                                                                                                                                                                                                                  | 12,8 ± 16,9         | -53,2%                     | 83,2 ± 6,8           | 86,2 ± 11,1         |
| Camacho 2016   | Dilatadores nasales               | 147            | 28,7 ± 24,0                                                                                                                                                                                                                  | 27,4 ± 23,3         | -4,5%                      | 78,7 ± 13,4          | 79,1 ± 12,4         |
| Ishii 2008     | Cirugía nasal                     | 225            | No hay mejoría significativa en IAH (4,83, IC del 95%: -1,6 a 11,62), sí en ESS                                                                                                                                              |                     |                            |                      |                     |
| Li 2011        | Cirugía nasal                     | 518            | 35,2 ± 22,6                                                                                                                                                                                                                  | 33,5 ± 23,8         | -4,8%                      | NR                   | NR                  |
| Camacho 2015   | Cirugía nasal y tolerancia a CPAP | 82             | Reducción de la presión de CPAP de 11,6 ± 2,2 a 9,5 ± 2,0 cm H <sub>2</sub> O (diferencia media de 2,66; IC del 95%: -3,65 a -1,67) y aumento del número de horas de uso de CPAP en 33 pacientes, de 3,0 ± 3,1 a 5,5 ± 2,0 h |                     |                            |                      |                     |
| Sharma 2019    | Cirugía nasal                     | 468            | Reducción media de 10,6 en IAH y de 4,6 en RDI, muy heterogénea                                                                                                                                                              |                     |                            |                      |                     |
| Wang 2019      | Cirugía nasal                     | 386            | No mejoría significativa en IAH (0,12; IC del 95%: -0,02 a 0,26), sí en ESS                                                                                                                                                  |                     |                            |                      |                     |
| Camacho 2016   | Amigdalectomía                    | 216            | 40,5 ± 28,9                                                                                                                                                                                                                  | 14,1 ± 17,1         | -65,2%                     | 77,7 ± 11,9          | 85,5 ± 8,2          |
| He 2019        | UPPP clásica                      | 212            | 40,2 ± 23,5                                                                                                                                                                                                                  | 25,2 ± 18,3         | -37,3                      | 67,0 ± 13,6          | 77,9 ± 11,7         |
| Camacho 2017   | LAUP                              | 717            | 28 ± 13                                                                                                                                                                                                                      | 19 ± 12             | -32%                       | 80 ± 8               | 82 ± 7              |
| Pang 2018      | Palatoplastia anterior            | 240            | 16,3                                                                                                                                                                                                                         | 7,1                 | NR                         | 84,5                 | 92,0                |
| Llewellyn 2018 | CAPSO (palatoplastia anterior)    | 80<br>92<br>78 | 16,8 ±<br>11,9<br>78                                                                                                                                                                                                         | 9,9 ±<br>10,9<br>78 | -41,1%<br>-61,7%<br>-52,1% | 81,6 ±<br>15,9<br>78 | 87,0 ±<br>6,4<br>78 |

|                     |                                                          |       |                                                                                                                                                                  |                  |        |                     |                 |
|---------------------|----------------------------------------------------------|-------|------------------------------------------------------------------------------------------------------------------------------------------------------------------|------------------|--------|---------------------|-----------------|
|                     | CAPSO +<br>Amigdalectomía                                |       | 24,8 ±<br>12,6                                                                                                                                                   | 10,6 ±<br>9,5    |        | 81,4 ±<br>19,2      | 92,0 ±<br>16,9  |
|                     | CAPSO + Faringoplastia<br>de expansión                   |       | 26,3 ±<br>17,7                                                                                                                                                   | 12,6 ±<br>5,8    |        | 83,8 ±<br>8,2       | 89,0 ±<br>3,6   |
| Choi 2013           | Implante Pilar                                           | 287   | 20,8                                                                                                                                                             | 15,7             | -24,3% | NR                  | NR              |
| Stuck 2018          | UPPP en ensayos<br>clínicos aleatorios                   | 50    | Reducción media del IAH de -18,59 (IC del 95%:<br>-34,14 a -3,04), de 35,4 a 17,9, reducción del<br>49,5%, estadísticamente superior a los grupos<br>no tratados |                  |        |                     |                 |
| Camacho<br>2016     | Faringoplastia de<br>expansión                           | 155   | 40 ± 12,6                                                                                                                                                        | 8,3 ±<br>5,2     | -79,3% | NR                  | NR              |
| Pang 2018           | UPPP/palatoplastia<br>anterior/faringoplastia<br>lateral | 2.715 | 35,66                                                                                                                                                            | 13,91            | -62%   | NR                  | NR              |
| Volner 2017         | Avance transpalatino                                     | 199   | 54,6 ±<br>23,0                                                                                                                                                   | 19,2 ±<br>16,8   | -64,8% | 81,9 ±<br>8,1       | 85,4 ±<br>6,9   |
| Abdullatif<br>2016  | Expansión maxilar                                        | 36    | 24,3 ±<br>27,5                                                                                                                                                   | 9,9 ±<br>13,7    | -59,3% | 84,3 ±<br>8,1       | 86,9 ±<br>5,6   |
| Abdullatif<br>2016  | Expansión<br>maxilomandibular                            | 3     | 47,5 ±<br>29,8                                                                                                                                                   | 10,7 ±<br>3,2    | -77,5% | 76,7 ±<br>14,5      | 89,3 ±<br>3,1   |
| Song 2016           | Suspensión hioidea                                       | 99    | 37,3 ±<br>21,1                                                                                                                                                   | 23,0 ±<br>18,6   | -38,3% | 80,8 ±<br>7,4       | 82,6 ±<br>6,5   |
| Baba 2015           | Radiofrecuencia base de<br>lengua                        | 276   | Mejoría significativa en RDI (RoM: 0,60; IC del<br>95%: 0,47 a 0,6) y en ESS                                                                                     |                  |        |                     |                 |
| Chang 2017          | Suspensión lingual                                       | 242   | 33,6 ±<br>21,1                                                                                                                                                   | 15,8 ±<br>16,0   | -53%   | 79,8 ±<br>17,5      | 83,9 ±<br>8,6   |
| Murphey<br>2015     | Glosectomía                                              | 522   | 48,1 ±<br>22,01                                                                                                                                                  | 19,05 ±<br>15,46 | -39,6% | 76,67<br>±<br>10,58 | 84,09 ±<br>7,90 |
| Lin 2009            | Cirugía multinivel                                       | 1.962 | 48,0                                                                                                                                                             | 19,0             | -60,3% | 75,6                | 83,8            |
| Samutsakorn<br>2018 | Multinivel: palatal + base<br>de la lengua               | 107   | Reducción media del IAH de -18,51 (IC del 95%:<br>-31,72 a -5,31), de 35,4 a 17,9,<br>estadísticamente significativa                                             |                  |        |                     |                 |
| Mulholland<br>2019  | Multinivel: palatal + base<br>de la lengua               | 1.806 | Reducción media del IAH de -23,67 (IC del 95%:<br>-27,27 a -20,06), estadísticamente significativa                                                               |                  |        |                     |                 |
| Song 2016           | Genioplastia                                             | 27    | 18,8 ± 3,8                                                                                                                                                       | 10,8 ±<br>4,0    | -43,8% | 82,3 ±<br>7,3       | 86,8 ±<br>5,2   |
| Song 2016           | Avance geniogloso                                        | 24    | 37,6 ±<br>24,2                                                                                                                                                   | 20,4 ±<br>15,1   | -45,7% | 83,1 ±<br>8,3       | 85,5 ±<br>6,8   |
| Holty 2010          | Avance Bimax                                             | 627   | 63,9 ±<br>26,7                                                                                                                                                   | 9,5 ±<br>10,7    | -85,1% | 71,9 ±<br>14,8      | 87,7 ±<br>4,8   |

|                          |                                                                                                                     |                |                                                                                                 |                                                        |                                                                                           |             |             |
|--------------------------|---------------------------------------------------------------------------------------------------------------------|----------------|-------------------------------------------------------------------------------------------------|--------------------------------------------------------|-------------------------------------------------------------------------------------------|-------------|-------------|
| <b>Zaghi 2016</b>        | Avance Bimax                                                                                                        | 518            | 57,2 ± 25,4                                                                                     | 9,5 ± 10,4                                             | -83,4%                                                                                    | 70,1 ± 15,6 | 87,0 ± 5,2  |
| <b>John 2018</b>         | Avance Bimax                                                                                                        | 251            | Reducción media del IAH de -44,76 (IC del 95%: -49,29 a -40,23), estadísticamente significativa |                                                        |                                                                                           |             |             |
| <b>Rojo-Sanchís 2018</b> | Avance Bimax                                                                                                        | 26*            | Reducción media del IAH de -45,59 (IC del 95%: -50,37 a -40,81), estadísticamente significativa |                                                        |                                                                                           |             |             |
| <b>Camacho 2019</b>      | Avance Bimax 6 meses postoperatorio<br>Avance Bimax 4-8 años postoperatorio<br>Avance Bimax > 8 años postoperatorio | 31<br>44<br>35 | 48,3<br>(42,1 ± 54,5)<br>65,8<br>(58,8 ± 72,8)<br>53,2 (45 ± 61,4)                              | 8,4 (5,6 ± 11,2)<br>7,7 (5,9 ± 9,5)<br>23(16,3 ± 29,9) | Reducción media del IAH, ESS y LSAT estadísticamente significativa y mantenida a > 5 años |             |             |
| <b>Noller 2017</b>       | Avance mandibular                                                                                                   | 57             | 45,9 ± 23,7                                                                                     | 6,2 ± 10,4                                             | -86,6%                                                                                    | 71,9 ± 14,6 | 89,0 ± 11,0 |
| <b>Justin 2016</b>       | Cirugía robótica transoral (TORS)                                                                                   | 12*            | Reducción media del IAH de -24,0 (IC del 95%: -22,1 a -25,8), estadísticamente significativa    |                                                        |                                                                                           |             |             |
| <b>Meccariello 2017</b>  | Cirugía robótica transoral (TORS)                                                                                   | 8*             | 44,4 ± 9,8                                                                                      | 18,8 ± 7,8                                             | -57,6%                                                                                    | 78,2 ± 3,2  | 84,3 ± 1,4  |
| <b>Miller 2017</b>       | Cirugía robótica transoral (TORS)                                                                                   | 353            | 44,3 ± 22,4                                                                                     | 17,8 ± 16,5                                            | -59,8%                                                                                    | 79,0 ± 9,5  | 84,1 ± 6,5  |
| <b>Certal 2015</b>       | Estimulación del nervio hipogloso                                                                                   | 200            | 35,5 ± 14,6                                                                                     | 17,6 ± 17,4                                            | -50,4%                                                                                    | NR          | NR          |
| <b>Kompelli 2018</b>     | Estimulación del nervio hipogloso                                                                                   | 381            | Reducción media del IAH de -21,1 (IC del 95%: -16,9 a -25,3), estadísticamente significativa    |                                                        |                                                                                           |             |             |
| <b>Camacho 2015</b>      | Traqueotomía                                                                                                        | 41             | 92,0 ± 34,8                                                                                     | 17,3 ± 20,5                                            | -81,2%                                                                                    | NR          | NR          |
| <b>Greenburg 2009</b>    | Cirugía bariátrica                                                                                                  | 342            | 54,7 (49-60)                                                                                    | 15,8 (13-19)                                           | -71,1%                                                                                    | NR          | NR          |

Modificado de Camacho et al. (31). \* Estudios evaluados (no se enumeran pacientes).

## 1. Cirugía nasal

Si bien la cirugía nasal, incluyendo septoplastia, turbinoplastia y/o cirugía valvular, no consigue solucionar como tratamiento aislado la AOS, debe considerarse su indicación cuando se evidencie en la exploración clínica una obstrucción nasal significativa o tras intolerancia a la CPAP, ya que hay evidencia de que mejora la tolerancia y adaptación a la misma.

En primer lugar, para la patología valvular nasal existen múltiples dispositivos, tiras o dilatadores nasales a los que recurren los pacientes con frecuencia. Sin embargo, su efectividad es escasa, reduciendo el IAH en un 5%<sup>32</sup>. En su metaanálisis, Camacho y cols.<sup>32</sup>, en una muestra total de 147 pacientes, determinaron que los dilatadores nasales tipo *Breathe Right Strips* o *NoZavent* obtuvieron una mejoría media del IAH de 28,7 a 27,4, una diferencia significativa.

Entre las cirugías nasales propuestas para la AOS, la más habitual es la turbinoplastia, sea mediante radiofrecuencia o microdebridador. Sin embargo, es igualmente importante la septoplastia y la cirugía valvular como elementos que mejoran el flujo nasal, y, siguiendo la ley de Starling, facilitan de forma llamativa la mejora de los colapsos de la VAS<sup>33-36</sup>.

En 2011, Li y cols.<sup>33</sup> presentaron un metaanálisis sobre el efecto de la cirugía nasal en la AOS, incluyendo 13 estudios prospectivos no aleatorizados, 9 de los cuales aportaban IAH pre y postoperatorio. Observaron una mejoría media del IAH de 35,2 a 33,2, una diferencia no significativa, mientras que la somnolencia mejoró en la ESS de 10,6 a 7,1, una diferencia significativa.

En 2015, Ishii y cols.<sup>34</sup> presentaron un nuevo meta-análisis sobre el efecto de la cirugía nasal en la AOS, incluyendo 10 estudios (2 ECA, 7 prospectivos no aleatorizados y un retrospectivo) que aportaban IAH pre y postoperatorio, con un total de 320 pacientes. Observaron una mejoría significativa de la ESS (3,53; IC del 95%: 0,64 a 6,23) y del índice de dificultad respiratoria (RDI) (11,06; IC del 95%: 5,92 a 16,19), pero no del IAH (4,83; IC del 95%: -1,6 a 11,62).

Más recientemente, Sharma y cols.<sup>35</sup> presentaron una revisión sistemática y un metaanálisis descriptivo sobre el efecto de la cirugía nasal en la AOS, incluyendo 16 estudios que aportaban IAH pre y postoperatorio, con un total de 320 pacientes. Observaron una mejoría de la somnolencia en ESS de 3,9 puntos y del IAH de 10,6 puntos, pero no pudieron realizar un metaanálisis cuantitativo debido a la heterogeneidad de las series.

Finalmente, Wang y cols.<sup>36</sup> presentaron un nuevo metaanálisis sobre el efecto de la cirugía nasal en la AOS, incluyendo 19 estudios publicados hasta junio de 2017, de los que 14 eran de pacientes con AOS que aportaban IAH pre y postoperatorio, con un total de 896 pacientes. Observaron una mejoría significativa de la somnolencia en ESS (3,79; IC del 95%: 2,20 a 5,37), pero no del IAH (0,12; IC del 95%: -0,02 a 0,26).

Existe abundante literatura que confirma la utilidad de la cirugía nasal para mejorar la tolerancia al CPAP<sup>37</sup>. Como resumen, Camacho y cols.<sup>37</sup> presentaron un metaanálisis sobre el efecto de la cirugía nasal en las presiones aplicadas en la CPAP como

tratamiento de la AOS, incluyendo 18 estudios publicados hasta julio de 2015 sobre 279 pacientes. En 82 pacientes, los datos permitieron observar una reducción media de la presión de 11,6 (DE: 2,2) a 9,5 (DE: 2,0). En 33 pacientes, los datos métricos de los equipos mostraban un aumento del número de horas de uso de 3,0 (DE: 3,1) a 5,5 (DE: 2,0).

En conclusión, diversos metaanálisis sobre la cirugía nasal en la AOS muestran que es efectiva para mejorar la somnolencia, pero no para mejorar el IAH, y que mejora la aceptación y tolerancia a la CPAP. Esto ha hecho que se replantee el momento en que se debe indicar la misma, siendo una opción hacerla antes de comenzar el tratamiento con la CPAP u otros tratamientos, previa valoración otorrinolaringológica, y una necesidad cuando haya intolerancia a los mismos<sup>38</sup>.

## **2. Cirugía amigdalар**

Cuando en la exploración física del paciente con AOS se evidencie una hipertrofia amigdalар llamativa, grado 3-5 de Friedman, existe abundante literatura que recomienda el tratamiento de la AOS mediante cirugía amigdalар, incluso antes de iniciar tratamiento con CPAP, sin necesidad de hacer una DISE confirmatoria<sup>39</sup>, si bien esta se podrá prescribir hasta que se realice la cirugía<sup>7</sup>.

En un reciente trabajo, Baudoin y cols.<sup>39</sup> han presentado una serie retrospectiva en la que la amigdalectomía en pacientes con AOS e hipertrofia amigdalар severa consiguió una tasa de éxito de Sher del 72%, que no aumentó al añadir cirugía del paladar. Numerosas revisiones sistemáticas y metaanálisis confirman la indicación de la amigdalectomía en adultos con AOS e hipertrofia severa de amígdalas<sup>40,41</sup>.

En 2016, Camacho y cols.<sup>40</sup> han publicado un metaanálisis sobre la efectividad de la amigdalectomía en adultos con AOS e hipertrofia severa de amígdalas (grado 2-4), incluyendo 17 estudios y un total de 216 pacientes. Observaron una mejoría significativa del IAH de 40,5 a 14,1 y de la somnolencia en ESS de 11,6 a 6,1, con una tasa de éxito del 85,2%, que llega al 100% si se seleccionan solo pacientes con IAH < 30.

Esto es más evidente en los niños con AOS, en los que la cirugía amigdalар se considera el tratamiento de elección de la AOS. En 2018, Reckley y cols.<sup>41</sup> han revisado más de 20 revisiones sistemáticas y metaanálisis sobre la efectividad de la amigdalectomía en niños con AOS e hipertrofia severa de amígdalas (grado 2-4), incluyendo 4 estudios en niños sin otra patología, 3 en niños obesos y 2 con síndrome de Down, encontrando una mejoría significativa del IAH. De ellos, destaca el metaanálisis de Friedman y cols.<sup>42</sup>, incluyendo 23 estudios y 1.079 pacientes, obteniendo un IAH postoperatorio < 1 en el 59% y < 5 en el 66%. En la revisión Cochrane realizada por Venekamp y cols.<sup>43</sup> se incluyeron tres ensayos controlados aleatorizados (ECA) que comparaban la

amigdalectomía frente a CPAP en 562 niños, hallando que es tan efectiva como la CPAP.

En la actualidad se describe la posibilidad de realizar una amigdalectomía (resección completa) o una amigdalotomía (resección parcial o intracapsular) como tratamiento de la AOS con hipertrofia amigdalar. Tres metaanálisis recientes describen que la amigdalotomía permite obtener una efectividad similar a la amigdalectomía, pero con menos dolor postoperatorio, uso de analgésicos, tiempo quirúrgico y recuperación hasta el alta, tanto en niños<sup>44,45</sup>, como en adultos<sup>46</sup>.

### **3. Cirugía palatofaríngea**

Cuando hay fracaso en el uso de la CPAP, si en la exploración física del paciente con AOS se evidencia un colapso en el paladar, sea en la exploración en la consulta o en la DISE, se podrá valorar ofrecer la cirugía palatofaríngea. Esta cirugía ha sido siempre la más accesible tras el diagnóstico de la AOS, pero no por ello debe ser realizada a todos los pacientes<sup>47</sup>.

Hasta el año 2000, la cirugía del paladar más utilizada era la uvulopalatofaringoplastia (UPPP) clásica, en la que la úvula era resecada<sup>48,49</sup>. Esta cirugía fácilmente provoca un paladar ojival, con tendencia al aumento del colapso lateral, agravando la AOS de nuevo, resultando un fracaso de la técnica en más del 50% de los casos. Además, produce numerosas complicaciones y secuelas, siendo la más llamativa el desarrollo de una estenosis faríngea en hasta un 10% de los casos, por lo que en revisiones recientes no se recomienda su realización<sup>50-53</sup>.

En su metaanálisis, Caples y cols.<sup>50</sup> incluyeron 20 trabajos sobre la UPPP (13), el colgajo uvulopalatal (5) y la faringoplastia lateral (2), todos anteriores a 2006, obteniendo una reducción media del IAH de solo un tercio (IC del 95%: 23-42%), si bien no mencionan los resultados según criterios de Sher. Posteriormente, Braga y cols.<sup>51</sup> presentaron una revisión de sus resultados en una serie de 64 pacientes y una reevaluación del metaanálisis de Caples y cols., usando los criterios de Sher, y obteniendo un 44% de curación (IAH < 5).

En 2016, Choi y cols.<sup>52</sup> presentaron otro metaanálisis sobre la UPPP, incluyendo 15 trabajos, de los que 8 son nuevos respecto a Caples y cols. Usando los criterios de Sher, clasificaron los pacientes como respondedores (reducción del IAH al 50% del IAH inicial) o no. El estadiaje de Friedman tipo I fue un predictor significativo del éxito de la cirugía (OR: 4,4; rango: 2,3-8,5), mientras que el tipo III y una baja posición del hioides lo son para el fracaso.

Finalmente, en 2019, He y cols.<sup>53</sup> han publicado un nuevo metaanálisis sobre la UPPP, centrado en los resultados a largo plazo, incluyendo 11 estudios, obteniendo una tasa de éxito del 67% a los 3-12 meses, y del 44% a largo plazo (más de 34 meses), con una reducción media de 15,41 del IAH (IC del 95%: -25,11 a -5,72).

Otras cirugías del paladar dirigidas a dar rigidez al mismo, como el uso del láser (LAUP)<sup>54-57</sup>, la radiofrecuencia del paladar<sup>34,35,58</sup>, la inyección de esclerosantes químicos en el paladar (CAPSO)<sup>59,60</sup> o los implantes del pilar<sup>61-63</sup> tampoco han demostrado utilidad en la AOS, como analizan algunos metaanálisis<sup>55,60,63</sup>.

Frente a estos pobres resultados, muchos autores defienden la llamada UPPP modificada, en la que se preserva parte de la úvula, se respeta la musculatura del paladar y se busca obtener una cicatrización centrífuga<sup>64</sup>. Existe un ECA realizado en Alemania que compara la UPPP modificada, asociada a amigdalectomía, frente a la CPAP como primer tratamiento de la AOS, demostrando una efectividad similar<sup>65</sup>. En este trabajo, Sommer y cols., en una muestra de 42 pacientes, obtuvieron una reducción media del IAH de 33,7 (DE: 14,6) a 15,4 (DE: 14,1) en el grupo operado (tasa de éxito de Sher del 70%) y una reducción media del IAH de 35,7 (DE: 19,4) a 28,6 (DE: 19,4) en el grupo control, una diferencia significativa.

Otro estudio de gran interés sobre la UPPP modificada es el ECA realizado en Suecia, cuyos resultados han sido descritos en varios artículos<sup>66-71</sup>, demostrando la eficacia y seguridad de esta cirugía, incluso a largo plazo. Browaldh y cols.<sup>66</sup> incluyeron a 65 pacientes con AOS (IAH > 15 y ESS > 8) a los que sometieron a UPPP modificada o a una espera de 6 meses (grupo control). A 7 meses del inicio del estudio obtuvieron una reducción media del IAH del 60%: de 53,3 (DE: 19,7) a 21,1 (DE: 16,7) en el grupo operado (tasa de éxito de Sher del 70%) frente a una reducción media del IAH del 11%: de 52,6 (DE: 21,7) a 46,8 (DE: 22,8) en el grupo control, con una diferencia significativa. Siguiendo los criterios de Sher, la tasa de éxito (IAH final < 20) fue del 59% frente al 6%. En otro trabajo sobre este mismo ECA<sup>67</sup>, los autores publicaron que la somnolencia mejoraba significativamente tras la UPPP modificada, a 7 meses del inicio, pasando la ESS de 12,5 (DE: 3,2) a 6,8 (DE: 3,9), sin cambios en el grupo control. Más adelante publicaron el efecto beneficioso de la UPPP modificada en la presión arterial, obteniendo en este ECA una reducción de la presión arterial sistólica y diastólica superior que el grupo control<sup>68</sup>. Sobre este mismo ECA, los autores han publicado que la respuesta se mantiene estable a 24 meses de la cirugía, con un IAH final de 24,1 (DE: 21,1) y un ESS de 5 (2-17)<sup>69</sup>, y una buena respuesta en escalas de calidad de vida<sup>70</sup>. Finalmente, han presentado los resultados a largo plazo en cuanto a complicaciones, con una tasa del 38% a 6 meses y del 31% a 24 meses, incluyendo sensación de globo faríngeo, excesiva mucosidad o disfagia leve, estando la mayoría de los pacientes satisfechos con la cirugía<sup>71</sup>.

Como resumen, existe una revisión sistemática sobre la UPPP, incluyendo la UPPP modificada, que demuestra su efectividad en la AOS<sup>72</sup>. Stuck y cols. analizaron 48 estudios con una tasa de éxito del 35-95%. Recogiendo los tres ECA publicados, la reducción del IAH fue de 35,4 a 17,9 (reducción del 49,5%), con una reducción media de 20,41 (IC del 95%: -32,78 a -8,04).

Posteriormente, en función de un mejor diagnóstico topográfico de la AOS<sup>73-75</sup>, han surgido modernas cirugías palatofaríngeas como la palatoplastia anterior<sup>76</sup>, la faringoplastia de expansión<sup>77</sup>, la faringoplastia lateral<sup>78</sup> o la faringoplastia barbada<sup>79</sup>. Estas técnicas obtienen resultados satisfactorios con reducciones del IAH del 50% en más del 75% de los casos, como se ha publicado en varias revisiones y metaanálisis<sup>80-84</sup>.

Carrasco-Llatas y cols.<sup>80</sup> presentaron una serie retrospectiva comparando cinco tipos de cirugía palatofaríngea en un total de 53 casos, observando una tasa de éxito de Sher del 47% al 72%, siendo superior con la faringoplastia de expansión. Posteriormente, los mismos autores publicaron sus resultados sobre 82 pacientes faringoplastia de reposición con sutura barbada (78,26% según criterios Sher)<sup>81</sup>.

Pang y cols.<sup>82</sup> y Camacho y cols.<sup>83</sup> publicaron sendos metaanálisis sobre la faringoplastia de expansión, hallando una tasa de éxito del 86% y una reducción media del IAH del 67%. Como resumen, Pang y cols.<sup>85</sup> han publicado un metaanálisis de la cirugía palatofaríngea en la AOS, incluyendo 59 artículos publicados desde 2001 (2.715 pacientes), que fueron divididos en UPPP, palatoplastias anteriores o faringoplastias laterales. Observaron una reducción media del IAH en los tres grupos: 24,7 en las palatoplastias anteriores, 19,8 en las laterales y 17,2 en la UPPP.

Respecto a las faringoplastias barbadas, siendo la técnica más en auge para abordar los colapsos laterales y circulares de la orofaringe, dos recientes revisiones han evaluado su efectividad, superior al 70%<sup>86,87</sup>.

Otra técnica descrita para la cirugía del paladar en la AOS es la faringoplastia de avance transpalatino<sup>85</sup>, indicada cuando se precisa mejorar un colapso anteroposterior puro, de la que se reportan buenos resultados en un metaanálisis<sup>89</sup>.

La elección de alguna de estas técnicas quirúrgicas palatofaríngeas selectivas, cuya acción va dirigida a la apertura de la VAS, especialmente a través del debilitamiento del músculo palatofaríngeo y del desarrollo de cicatrización centrífuga en el paladar blando, dependerá de los hallazgos anatómicos en la exploración física y en la DISE.

En muchas ocasiones, la efectividad de la cirugía palatofaríngea en la AOS queda supeditada a ser parte de una cirugía multinivel o parte de un tratamiento

multidisciplinar<sup>90</sup>. Así, Mackay y cols.<sup>91</sup> han publicado un ECA multicéntrico australiano incluyendo 102 pacientes. Tras cirugía multinivel, a los 6 meses, el IAH mejoró de 47,9 a 20,8, frente a un cambio de 45,2 a 34,5 en los controles; de igual forma, el ESS pasó de 12,4 a 5,3 tras la cirugía, frente a 11,1 a 10,5 en los controles.

#### **4. Expansión maxilar mediante distracción osteogénica (*distraccion osteogenesis maxillary expansion o DOME*)**

Se trata de un concepto emergente en la cirugía de la AOS. Surge tras la identificación de un subgrupo de pacientes con obstrucción nasal persistente y maxilar superior estrecho y profundo que no presenten desviación septal, hipertrofia de cornetes o colapso valvular nasal o en los que la cirugía nasal previa haya fracasado<sup>92,93</sup>.

En la población pediátrica es ampliamente reconocido el uso de expansores palatinos en niños con enfermedad persistente tras adenoidectomía y amigdalectomía<sup>94</sup>. El mecanismo propuesto mediante la DOME tiene como objetivo aumentar la anchura del suelo nasal, asociando así una disminución de la resistencia al paso del aire por las fosas nasales. Del mismo modo, se aumenta el espacio en la cavidad oral al ensancharse el paladar, de manera que la lengua puede acomodarse mejor y aumentar el espacio aéreo posterior.

El procedimiento se lleva a cabo mediante osteotomías de LeFort I bilaterales y de la sutura medio palatina. A continuación, se coloca un expansor maxilar para la distracción ósea.

La DOME está indicada en pacientes con AOS grave con hipoplasia esquelética transversal y mordida cruzada o con AOS moderada con obstrucción nasal persistente y paladar estrecho y ojival, que no presenten desviación septal, hipertrofia de cornetes o colapso valvular nasal o en los que la cirugía nasal previa haya fracasado.

En el metaanálisis de Abdullatif y cols.<sup>95</sup> en 8 estudios de los 9 estudiados, tanto el IAH (de  $24,3 \pm 27,5$  [IC del 95%: 15,3, 33,3] a  $9,9 \pm 13,7$  [IC del 95%: 5,4, 14,4] episodios por hora [reducción relativa del 59,3%]) como la saturación de oxígeno (de  $84,3 \pm 8,1\%$  [IC del 95%: 81,7, 87,0] a  $86,9 \pm 5,6\%$  [IC del 95%: 85,1, 88,7]) mejoran considerablemente tras la DOME, igual que la somnolencia.

El grupo de trabajo aporta además una hipótesis interesante: al expandir el maxilar superior se tensan los músculos palatogloso y palatofaríngeo, lo que reduce la colapsabilidad de la vía aérea durante el sueño. Este mismo grupo estudia también los posibles beneficios de una expansión maxilomandibular; en la literatura revisada se observan muy pocos casos y concluyen que son necesarios estudios más amplios, en los que se valoren mayor número de pacientes y de variables (complicaciones, IMC, etc.).

Se trata de procedimientos muy controvertidos, ya que hay que valorar la efectividad del resultado en relación con la comorbilidad y el tipo de tratamiento requerido en función de las características anatómicas y oclusales de cada paciente. Es muy importante, por lo tanto, la correcta selección del paciente y la selección del procedimiento quirúrgico más beneficioso para cada caso.

## **5. Cirugía de la base de la lengua y epiglotis**

La cirugía de la base de la lengua en la AOS es habitualmente parte del tratamiento multidisciplinario de esta patología. Está indicada cuando hay características anatómicas favorables, en las que se objetive un colapso retrolingual, a la luz de la exploración clínica y/o de la DISE, en pacientes en los que fracasa el tratamiento con CPAP o con dispositivos de avance mandibular, y en ausencia de alteraciones esqueléticas que propicien una cirugía del marco óseo.

En adultos, la cirugía de hipofaringe y laringe habitualmente forma parte de tratamientos multinivel en los que se combina cirugía nasal, palatofaríngea, base de la lengua y epiglotis en un mismo acto quirúrgico. En recientes metaanálisis se comprueba que la cirugía multinivel es efectiva en el tratamiento de la AOS<sup>96,98</sup>. En este grupo de cirugías se incluyen diversos procedimientos<sup>99</sup>:

### **a. Suspensión hioidea**

El hueso hioides forma parte de la hipofaringe, y es la única estructura rígida de su pared anterior. En él se insertan los músculos genioglosos, genihioideos y constrictores medios de la faringe, por lo que su posición es importante a la hora de mantener permeable la vía aérea.

La cirugía se realiza por vía cervical anterior, con el paciente en decúbito supino y ligera hiperextensión<sup>100</sup>. En primer lugar, se expone el tercio superior del cartílago tiroides. Al suturar el hioides anteroinferiormente al tiroides, se aumenta la estabilidad de esta región, obteniendo un aumento del espacio retrolingual, lo que dificulta el colapso hipofaríngeo durante el sueño.

En metaanálisis reciente<sup>101</sup> se considera una cirugía efectiva en la AOS, con una tasa de éxito del 60%, especialmente cuando se asocia con otros procedimientos como UPPP o avance geniogloso.

### **b. Estabilización lingual con suturas**

En un intento de aliviar la obstrucción retrolingual con un procedimiento mínimamente invasivo se ha diseñado un sistema de suturas para estabilizar la lengua en una posición más anterior. El sistema REPOSE (Influ-ENT Ltd, Concord, New Hampshire) incluye un dispositivo atornillador, un tornillo autopenetrante de fijación ósea con 2 hilos de 1-0 Prolene (Ethicon Endo-Surgery, Inc., Cincinnati, Ohio) y un instrumento pasador para la

sutura en la base de la lengua. La tensión en la sutura debe ser suficiente como para notar una depresión en la base de la lengua sin llegar a estrangular el tejido<sup>102</sup>.

El espacio retrolingual no aumenta con esta técnica, pero se consigue un menor desplazamiento posterior de la lengua durante el sueño. En metaanálisis recientes<sup>103,104</sup>, se considera una cirugía efectiva en la AOS, con una tasa de éxito del 60%, especialmente cuando asocia con otros procedimientos como UPPP o avance geniogloso.

### **c. Radiofrecuencia de la base de la lengua**

La reducción volumétrica de los distintos tejidos blandos de la VAS a nivel hipofaríngeo es una técnica mínimamente invasiva, mediante la cual se pretende aumentar el espacio aéreo retrolingual, sin causar complicaciones. Habitualmente se utiliza a la vez que otros procedimientos más definitivos, como el avance geniogloso y la suspensión de hioides. La aplicación de radiofrecuencia provoca la coagulación de las proteínas y la necrosis del tejido circundante. La cicatrización posterior genera una reducción del tamaño en la zona donde se aplicó. Habitualmente se realizan alrededor de 6-8 tunelizaciones en el espesor de la base de la lengua, en la línea media, las zonas paramediales y las zonas ventrales anteriores. El tratamiento puede repetirse cada 4-6 semanas y hacer un total de 3 sesiones para obtener mejores resultados<sup>105</sup>. En un reciente metaanálisis<sup>35</sup> se observa que es una técnica poco efectiva, aunque se asocie a otras cirugías multinivel.

### **d. Amigdalectomía lingual con Coblator**

Cuando se objetiva una hipertrofia de la amígdala lingual en la exploración clínica y/o en la DISE, con AOS, se puede realizar la amigdalectomía lingual mediante Coblator (*coblator endoscopic endoscopic lingual lightening* o CELL). Se utiliza un terminal de amigdalectomía Evac 70 para Coblator II (Arthrocare Corp, ENTec Division, Sunnyvale, California) bajo visión endoscópica. Esta técnica ofrece algunas ventajas: buena visualización del tejido con ayuda de endoscopios angulados; escaso o nulo sangrado intraoperatorio; reducción del edema y menor dolor postoperatorio al trabajar a baja temperatura. Además de eliminar el tejido linfoide hasta encontrar el plano muscular de la lengua, se pueden reseca pequeñas porciones de la musculatura de la base de la lengua, sobre todo en la línea media, donde no existen grandes vasos. Al finalizar el procedimiento los pacientes suelen ser trasladados a la UCI durante 24 h para observación, tras lo cual pueden pasar a planta y recibir el alta, siendo un procedimiento seguro.

Una variante de esta técnica es hacerla de forma submucosa, a través de un túnel, lo que se conoce como SMILE (*submucosal minimally invasive lingual excision*). Consigue resecciones amplias de tejido, con menor morbilidad que la CELL.

En un reciente metaanálisis<sup>106</sup>, la glossectomía mediante Coblator es una técnica efectiva, con una tasa de éxito del 60%, especialmente si se utilizan pruebas de imagen como la TC para determinar el colapso retrolingual y localizar las arterias linguales para maximizar la resección<sup>107</sup>, y si se asocia a cirugía multinivel<sup>108</sup>.

#### **e. Cirugía robótica transoral (TORS)**

El concepto de la cirugía robótica transoral (TORS) para el tratamiento de la AOS fue primero introducido en 2008 por Vicini y cols. como una técnica quirúrgica eficaz para el tratamiento de la hipertrofia de la base de lengua. Actualmente se considera un procedimiento efectivo para el tratamiento de la hipertrofia de la base de la lengua, ya sea solo o combinado con otros procedimientos, que incluyen cirugía palatofaríngea y epiglottoplastia.

Sus principales ventajas son que permite mejor acceso que la cirugía abierta, con menor morbilidad, ofrece una visión en 3D del campo quirúrgico, consigue mayor precisión de corte y manejo tisular debido a la disminución del temblor natural de las manos y supone menor posibilidad de sangrado debido al mayor control de los principales vasos sanguíneos de la zona.

El primer paso es conseguir una exposición adecuada de la base de la lengua. Para ello, el paciente se coloca en posición supina; es recomendable fijar la punta de la lengua mediante una sutura de seda gruesa para traccionar de la misma y, acto seguido, fijarla mediante un abre bocas (Davis Mayer, Karl Storz, USA) o Feyh-Kastenbauer-Weinstein-O'Malley (Gyrus, Germany). Se introducen los tres brazos robóticos dentro de la cavidad bucal: en el centro la cámara 3D de 0° o 30° y, a los lados, en un brazo una pinza de disección y sujeción (Maryland Disector 5 mm) y, en el otro brazo, un bisturí-espátula (Monopolar Cutery Spatula Tip). Los instrumentos de los brazos laterales pueden ser intercambiados durante la cirugía según el lado de la base de la lengua donde se esté trabajando y según las preferencias del cirujano. Es fundamental la presencia de un ayudante en la cabecera del paciente cuya función será aspirar tanto el sangrado del campo quirúrgico como el humo.

En recientes metaanálisis<sup>109-111</sup>, la TORS es una técnica efectiva, con una tasa de éxito del 50-70%. En una revisión sistemática<sup>112</sup> y en un reciente metaanálisis<sup>113</sup>, comparando la TORS y el Coblator lingual, ambas presentan una tasa de éxito similar, con menos complicaciones con Coblator que con TORS.

#### **f. Epiglottoplastia (supraglottoplastia)**

Durante muchos años apenas se reconocía el papel de la epiglotis en el desarrollo de los colapsos en los pacientes con AOS. Gracias a la DISE, se objetivan anomalías de la epiglotis en hasta un 20% de los pacientes, especialmente entre aquellos que no

toleran la CPAP. Puede tratarse de una epiglotis en puerta batiente (*floppy epiglotis*) o de una epiglotis colapsada con forma malácica<sup>114,115</sup>.

El objetivo de la epiglotoplastia es fijar el prolapso de la epiglotis o eliminar tejido epiglótico redundante para liberar la VAS. Se comienza realizando una incisión en el borde superior de epiglotis y en línea media, se continúa hacia abajo hasta unos 5 mm por encima del plano valecular. No se debe profundizar más para evitar riesgo de aspiración. Posteriormente se efectúa un corte horizontal a ambos lados dejando un pequeño margen lateral para evitar riesgo posterior de aspiración y sangrado de vasos laríngeos superiores.

La supraglotoplastia es efectiva como tratamiento de la AOS infantil debido a laringomalacia u otras anomalías de la epiglotis<sup>116-119</sup>. En adultos, se recomienda realizar la epiglotoplastia en casos seleccionados en función de los hallazgos de la DISE, evitando sobreindicar esta cirugía<sup>117,118</sup>.

## **6. Procedimientos a nivel geniogloso y mentoniano**

Las alteraciones en la morfología facial ósea pueden ser causa importante de anomalías y estrechamientos en las vías respiratorias, ya que la musculatura faríngea guarda una estrecha relación con las estructuras óseas vecinas. El músculo geniogloso es el más grande y ha sido muy estudiado en relación con la apnea del sueño. Durante la respiración se encarga de preservar la permeabilidad de la vía aérea avanzando la base de la lengua. Se inserta en el hioides y en la mandíbula, de modo que en situaciones de retrognatia mandibular con desplazamiento posterior de la lengua se produce una estrechez de la vía respiratoria. Del mismo modo ocurre algo similar cuando tenemos un aumento del volumen lingual, una hipoplasia maxilar superior con paladar estrecho o una importante discrepancia maxilomandibular.

En 1984, Riley y Powel describieron por primera vez el avance geniogloso a modo de genioplastia horizontal de deslizamiento aislada asociada a una suspensión hioidea. Desde entonces se han desarrollado numerosas modificaciones, siendo las más habituales la genioplastia (osteotomía horizontal de deslizamiento del mentón), el avance del tubérculo geniogloso y esta última técnica asociada a una suspensión hioidea.

En el avance geniogloso se avanza el tubérculo geniano en unión con los músculos genioglosos y la base de la lengua mediante una osteotomía rectangular en la parte anterior del mentón por vía vestibular, inferior a las raíces de los incisivos y caninos, pudiendo llegar lateralmente hasta casi los orificios de salida de los nervios mentonianos. Se tracciona de la pastilla ósea y se gira 90° para fijarla al remanente óseo mediante miniplacas o tornillos.

Gracias a las técnicas de imagen, especialmente las 3D, podemos definir de forma precisa el lugar donde se localizan los tubérculos en la cara interna mandibular y, por lo tanto, asegurar que la pastilla ósea contiene los músculos genioglosos para un correcto avance de los mismos. Se consiguen avances de la lengua de 8-18 mm, aumentando considerablemente el espacio aéreo posterior.

Las indicaciones para esta cirugía son pacientes con obstrucción de la vía aérea a nivel orofaríngeo o hipofaríngeo, que pueden o no asociar retrusión de la base de la lengua y tener o no repercusión estética facial, retrognatía mandibular con clase I de Angle, y AOS leve a moderada (IAH 5-30)<sup>120</sup>.

Si el paciente además quiere una mejora estética de su tercio inferior facial o, por el contrario, quiere evitar un cambio en el perfil facial o no llevar tratamiento ortodóncico antes y después de la cirugía, se le puede ofrecer la combinación de avance geniogloso y genioplastia de deslizamiento<sup>121</sup>.

Esta técnica se desaconseja en casos de apnea grave; en casos de IAH > 30, se recomienda realizar en combinación con otros procedimientos (dentro del marco de la cirugía multinivel), así como en aquellos casos con IMC > 30.

Gracias a las actuales técnicas de imagen, planificación prequirúrgica y férulas customizadas se consiguen evitar complicaciones que antes eran habituales en esta cirugía, como el daño neurosensorial, la dehiscencia muscular, las recesiones gingivales o el daño a las raíces dentales. La planificación quirúrgica mediante escáneres asociados a *softwares* de análisis facial nos permite estudiar de forma cuidadosa las necesidades de cada paciente en función de su anatomía y planificar una cirugía segura y predecible obteniendo resultados óptimos en relación con la enfermedad, pero también acordes con las necesidades estéticas del paciente.

En el metaanálisis de Song y cols.<sup>122</sup> se revisaron 1.207 estudios, de los cuales se utilizaron 67 y 13 de ellos cumplieron criterios de inclusión; en total se estudiaron 111 pacientes; 27 con genioplastia estándar, 10 con modificada, en 24 pacientes se realizó avance del tubérculo geniogloso y en 50 se asoció además suspensión hioidea. En la genioplastia aislada el IAH disminuye de 18,8-3,8 (IC del 95%: 17,6, 20,0) a 10,8-4,0 (IC del 95%: 9,5, 12,1) episodios/h (reducción relativa del 43,8%),  $P < 0,0001$ . La saturación mínima de oxígeno (LSAT) disminuye de 82,3-7,3% (IC del 95%: 80,0, 84,7) a 86,8-5,2% (IC del 95%: 85,1, 88,5),  $P < 0,0032$ . En la genioplastia modificada el IAH aumenta al 37,3%. En el avance geniogloso el IAH se reduce de 37,6-24,2 (IC del 95%: 27,9, 47,3) a 20,4-15,1 (IC del 95%: 14,4, 26,4) episodios/h (reducción relativa 45,7%),  $P < 0,0049$ . LSAT mejora de 83,1-8,3% (IC del 95%: 79,8, 86,4) a 85,5-6,8% (IC del 95%: 82,8, 88,2),  $P < 0,2789$ . Si además se asocia suspensión hioidea, el IAH se reduce de 34,5-22,1 (IC del 95%: 28,4, 40,6) a 15,3-17,6 (IC del 95%: 10,4, 20,2) episodios/h

(reducción relativa 55,7%),  $P < 0,0001$ ; LSAT mejora de 80,1-16,6% (IC del 95%: 75,5, 84,7) a 88,3-6,9% (IC del 95%: 86,4, 90,2),  $P < 0.0017$ . Por lo tanto, observamos una reducción significativa del IAH en pacientes adultos con apnea de sueño al realizar un avance geniogloso aislado o en combinación con una suspensión hioidea, mayor que si se realiza una genioplastia sola. Del mismo modo se aprecia una mejoría significativa de los síntomas subjetivos en la ESS, así como un claro aumento en todos los casos de la mínima saturación de oxígeno postoperatoria.

Los resultados dependen del tipo de osteotomía a realizar, siendo imprescindible que para el éxito de la técnica se avancen los tubérculos genioglosos.

## **7. Procedimientos mandibulares**

La **distracción osteogénica** mandibular se presenta como una alternativa a la cirugía ortognática convencional. Es efectiva en el tratamiento de AOS en casos pediátricos sindrómicos, posiblemente sea el tratamiento de elección en niños con disarmonías craneofaciales en los que se intenta evitar la traqueotomía.

En pacientes adultos se utiliza en casos muy seleccionados (cuando no es posible realizar un avance bimaxilar convencional o en casos de anquilosis de la articulación temporomandibular) y con AOS grave.

Parece que los resultados obtenidos a largo plazo son estables y las complicaciones son moderadas<sup>123</sup>. No hay metaanálisis ni ensayos clínicos al respecto.

## **8. Avance maxilomandibular (bimaxilar)**

El avance maxilomandibular ha sido clásicamente el último escalón del tratamiento quirúrgico de la apnea de sueño.

Consiste en realizar osteotomías maxilares tipo LeFort I y mandibulares sagitales tipo Obwegesser en el mismo acto quirúrgico, que permitan una movilización y nueva reposición de los fragmentos óseos en los 3 planos del espacio. La osteosíntesis se realiza mediante placas y tornillos. El movimiento de avance se asocia a un movimiento de rotación antihorario del complejo óseo, centrado en el arbotante maxilar, consiguiendo un considerable aumento de la vía aérea posterior. Es deseable un avance mínimo de 8-12 mm para obtener los resultados deseados, así como una adecuada normalización del plano oclusal mandibular<sup>124</sup>. Debe acompañarse de un tratamiento ortodóncico pre- y postoperatorio en la mayoría de los casos para mantener una adecuada oclusión y estética facial. En la actualidad el cirujano maxilofacial dispone de importantes herramientas diagnósticas (3D) y de planificación quirúrgica (virtual) que permiten unos resultados estéticos y funcionales excelentes.

Es la técnica quirúrgica más efectiva para el tratamiento de esta patología, alcanzando tasas de éxito superiores al 95%. Es un procedimiento óseo altamente estable a largo plazo, independientemente del sexo, edad en la cirugía, tiempo de seguimiento o cantidad de avance<sup>125</sup>.

Las indicaciones clásicas de esta técnica son AOS grave (IAH > 40), obesidad mórbida con desarrollo craneofacial normal, retrognacia mandibular severa (SNB < 74) y fallo o rechazo de otro tipo de terapias.

Los criterios del protocolo actual posicionan al avance maxilomandibular como primer escalón quirúrgico terapéutico de la AOS en determinados casos, entre los que se incluyen estas tres posibilidades<sup>126</sup>:

1. Pacientes con AOS grave (IAH > 65) y contraindicación de neuroestimulación o cirugía multinivel de tejidos blandos inadecuada.
2. Pacientes con deformidad dentofacial grave.
3. Pacientes con:
  - Colapso concéntrico del velo del paladar y de la pared lateral faríngea.
  - Posición baja del hioides y ángulo mentocervical obtuso.
  - Inclinación marcada del plano oclusal.

En los últimos años se han publicado varios metaanálisis con muy buenos resultados de la técnica. Todos coinciden en que el avance maxilomandibular es un tratamiento altamente efectivo, con clara mejoría de los parámetros oximétricos (IAH, RDI, LSAT) y de la calidad de vida y sintomatología del paciente (ESS), siendo todos los datos estadísticamente significativos<sup>127-130</sup>.

El objetivo principal del metaanálisis de Rojo-Sanchís<sup>127</sup> es investigar los efectos del avance bimaxilar en la vía aérea de pacientes con AOS mediante el estudio de los cambios 3D en posición vertical y supina y de los cambios oximétricos observados en IAH, RDI y LSAT, así como en la calidad de vida medida a través de la ESS. Incluye estudios con pacientes adultos diagnosticados de AOS a los que se realizó avance bimaxilar, control con 3D CBCT o TC y medición de parámetros oximétricos y seguimiento a 6 meses. Estudios con menos de 10 pacientes fueron rechazados. En la dimensión de la vía aérea se comparan resultados pre y postoperatorios y se aprecian cambios significativos. En la posición vertical el volumen aumenta de 7,7 a 10,7 cm<sup>3</sup> ( $p < 0,01$ ) y en posición supina de 5,9 a 7,8 cm<sup>3</sup>, siendo también estadísticamente significativo. En los parámetros oximétricos hay mejoría estadísticamente significativa en todos ellos, IAH, RDI y LSAT, igual que en la calidad de vida de los pacientes ( $p < 0,001$ ).

Zaghi y cols.<sup>128</sup> y John y cols.<sup>129</sup> tienen en cuenta la severidad preoperatoria de la AOS

como factor predictivo más fiable del éxito quirúrgico y, por consiguiente, de la cura de la enfermedad. Definen éxito quirúrgico como el porcentaje de pacientes con más del 50% de reducción del IAH inicial o nuevo IAH < 20, y consideran la curación de la enfermedad cuando el IAH es < 5. De esta manera los pacientes más graves son los que más se benefician de esta técnica y presentan más mejoría en el IAH y RDI, mientras que los pacientes menos severos pueden alcanzar más fácilmente la curación completa. Se incluyen 45 estudios con 518 pacientes sometidos a intervención quirúrgica, en los cuales se observa mejoría de IAH y RDI en 512 (98,8%). Se aprecia igualmente mejoría de la saturación de oxígeno, de 70,1% [15,6%] a 87,0% [5,2%];  $P < 0,001$ ) y ESS (13,5 [5,2] a 3,2 [3,2];  $P < 0,001$ ). La tasa de éxito quirúrgico fue de 389 (85,5%) y 175 (38,5%), respectivamente. El IAH preoperatorio < 60 fue el factor que más se relacionó con la mayor tasa de cura postoperatoria<sup>126</sup>.

Para el grupo de Holty<sup>130</sup> es fundamental una adecuada selección del paciente; el mayor éxito quirúrgico se logra en pacientes más jóvenes, con menor IAH preoperatorio, en los que se realiza un avance maxilar mayor que el mandibular y con bajo IMC (así se podría definir al paciente perfecto para esta técnica quirúrgica). Se obtiene una tasa de curación del 67% en pacientes con IAH preoperatorio < 30.

Por último, el metaanálisis de Camacho y cols.<sup>131</sup> se centra en los resultados de la cirugía a corto, medio, largo y muy largo plazo. Se revisan un total de 445 estudios y 120 pacientes. Un total de 31 pacientes muestran una reducción del IAH de 48,3 episodios/h (IC del 95%: 42,1-54,5) pre-MMA a 8,4 (IC del 95%: 5,6, 11,2) a medio plazo; 54 pacientes muestran disminución del IAH de 65,8 episodios/h (IC del 95%: 58,8-72,8) pre-MMA a 7,7 (IC del 95%: 5,9, 9,5) a largo plazo, y 35 presentan disminución de 53,2 episodios/h (IC del 95%: 45, 61,4) pre-MMA a 23,1 (IC del 95%: 16,3, 29,9) a muy largo plazo. La mejoría de la somnolencia se mantuvo similar a lo largo del tiempo y LSAT mejoró a largo plazo. Concluye que los pacientes tratados mediante avance maxilomandibular presentan una clara mejoría del IAH, somnolencia y LSAT a corto, medio y largo plazo, pero curiosamente, a muy largo plazo, se observa un empeoramiento de IAH, volviendo a una apnea moderada. La explicación para esto se basa en que los tejidos blandos se vuelven redundantes y laxos con el paso del tiempo, de manera que obstruyen de nuevo la vía aérea, empeorando la AOS. A nivel óseo, parece que la recidiva es mucho menos frecuente, aunque sigue siendo posible, ya que el envejecimiento propio del individuo provoca cierto grado de reabsorción y atrofia óseas.

Por otra parte, el avance maxilomandibular presenta una baja tasa de complicaciones, siendo las más frecuentes las alteraciones neurosensoriales, la maloclusión y las alteraciones temporomandibulares.

## 9. Estimulación del nervio hipogloso

En 1978, Remers y cols. fueron pioneros en descubrir la relación directa que existía entre la pérdida de activación del músculo geniogloso durante el sueño y la disminución

del calibre de la VAS en estos pacientes. A lo largo de los años se han desarrollado diferentes proyectos cuyo fin era estimular el nervio hipogloso de forma crónica para mejorar la apnea del sueño. En la última década, el interés por esta técnica ha ido aumentando progresivamente, gracias en parte a los avances tecnológicos tan importantes que se han producido<sup>132,133</sup> y a la selección de los pacientes adecuados para la misma, fundamentados en la DISE<sup>134</sup>.

Mediante una intervención quirúrgica se coloca un dispositivo que actúa como un marcapaso con un pequeño generador y un cable de detección, pero en lugar de utilizar pulsos eléctricos para controlar el ritmo cardíaco anormal, el dispositivo utiliza dos cables para estimular la lengua a nivel de las ramas distales que inervan los músculos geniogloso y genihióideo. Los pacientes utilizan un mando a distancia para encender el dispositivo antes de ir a dormir y apagarlo al despertar. Un retraso permite al usuario quedarse dormido antes de que el generador de impulsos comience la estimulación. Después de detectar el patrón de respiración del usuario, la máquina estimula el nervio hipogloso para ampliar toda la vía aérea superior mediante la protrusión lingual (**Figuras 11 y 12**).

**Figura 11.** Dispositivos de estimulación del nervio hipogloso. (1) Manguito de electrodo alrededor del nervio hipogloso conectado a (2) un generador de pulso implantable colocado quirúrgicamente en un pliegue subcutáneo; dicho generador está conectado a un cable de detección de la respiración (3). (Tomado de Mediano et al. [135].)

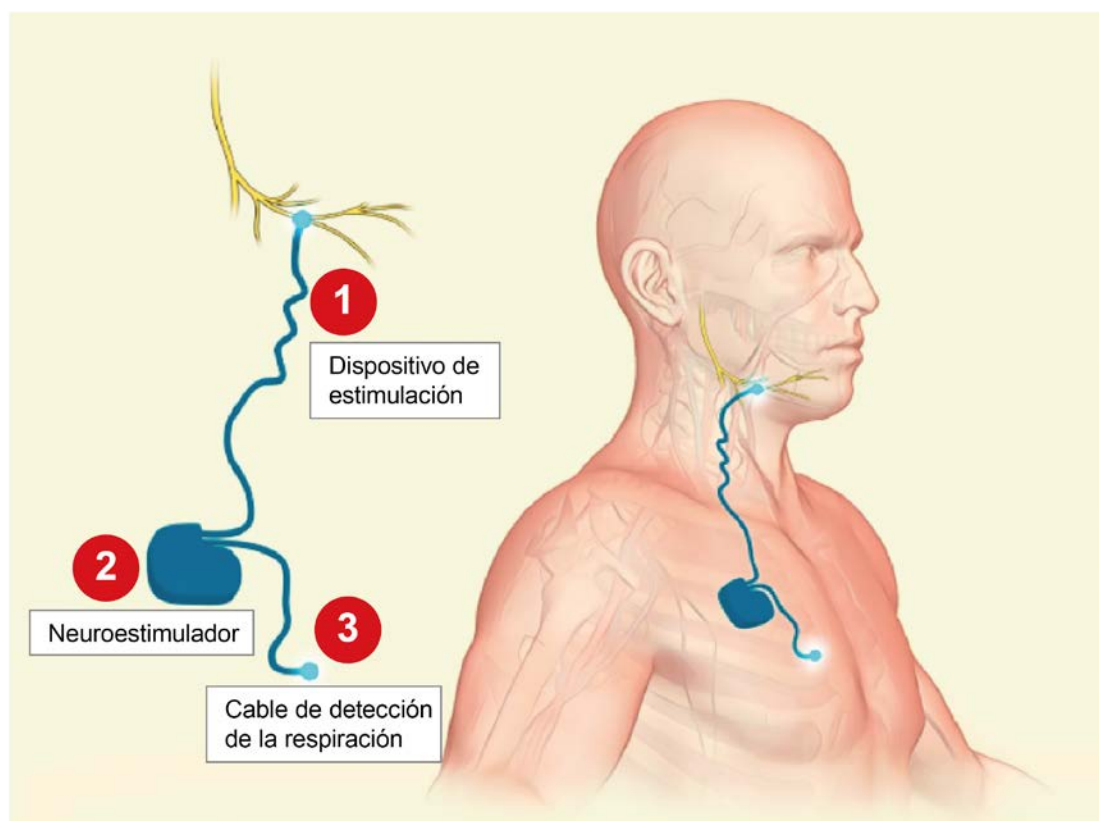

**Figura 12.** Estimulación del nervio hipogloso. **A.** Manguito de electrodo rodeando el ramo medial del nervio hipogloso (g: glándula; m: músculo; n: nervio). **B.** Se coloca un cable sensor de presión pleural con el sensor de ventilación frente a la pleura. **C.** Generador de pulso implantable con puertos de conexión de perfil que albergan los conectores de estimulación y detección de la presión pleural. (Tomado de Hong et al. [24], con autorización.)

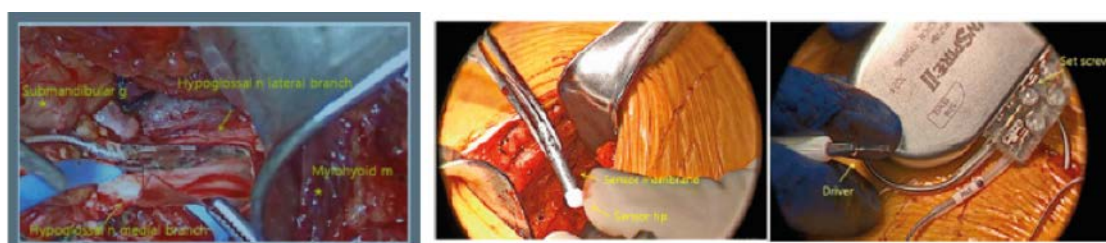

En algunos estudios a largo plazo (hasta 5 años) se muestra una buena efectividad del dispositivo<sup>136-139</sup>. Se trata de un tratamiento efectivo en casos refractarios al uso de CPAP, asocia una alta tasa de adherencia y mejora de forma significativa los parámetros objetivos (IAH, IDO) y los subjetivos (ESS) de la estructura del sueño. En todos los pacientes, el IAH disminuyó significativamente una media de 35 episodios/h después de

implantar el dispositivo, lo que se corresponde con una reducción media de un 84%. Además, el nivel de oxígeno más bajo medido en la sangre durante la noche aumentó significativamente un 11%, de un 79% a un 90%. Estos resultados son estables a los 5 años<sup>140</sup>.

Actualmente es un tratamiento alternativo para aquellos casos en los que no se tolera la CPAP, tal como analizan recientes metaanálisis. Kompelli y cols.<sup>141</sup> analizaron 16 estudios y 381 pacientes; a los 12 meses mejora IAH en 21,1 (IC del 95%: 16,9-25,3), RDI en 15,0 (IC del 95%: 12,7-17,4) y la ESS se reduce en 5,0 (IC del 95%: 4,2-5,8). Los efectos adversos más comunes son dolor (6,2%: 0,7-16,6), abrasión lingual (11,0%: 1,2-28,7) y disfunción del aparato (3,0%: 0,3-8,4 (5,8%: 0,3-17,4). Diversos autores señalan también parestesias, debilidad labial y cambios en el flujo salivar.

En otro metaanálisis reciente en el que se compararon diferentes modelos de implantes en 350 pacientes, Constantino y cols.<sup>142</sup> observaron que la tasa de éxito a 12 meses es del 72,4% con el implante Inspire, del 76,9% con Imthera y del 55% con Apnex, y a 60 meses del 75% con Inspire.

Está indicado fundamentalmente en pacientes con AOS moderada-grave (IAH entre 20-50) intolerantes a CPAP y sin mejoría tras DAM, que cumplan dos requisitos: IMC < 32 y evidencia de ausencia de colapso circunferencial en DISE.

Ya hay estudios que comparan la neuroestimulación con la TORS de la base de la lengua, siendo más beneficiosa la primera<sup>143-145</sup>.

La gran ventaja de la neuroestimulación del hipogloso es la ausencia de disfagia postoperatoria, típico efecto secundario en las cirugías clásicas de la VAS<sup>146</sup>, así como la mejor tolerancia y adherencia que los pacientes tienen con el dispositivo, frente a la CPAP o los dispositivos de avance mandibular<sup>147</sup>.

## **10. Traqueotomía**

Históricamente, la traqueotomía fue el primer tratamiento ofrecido a los pacientes con AOS severa en 1968. Todavía puede tener algunas indicaciones excepcionales en pacientes en que otros tratamientos han fracasado, ya que en estos casos se han demostrado sus efectos beneficiosos a largo plazo, tanto en adultos<sup>148</sup> como en niños<sup>149</sup>.

## **11. Cirugía bariátrica**

En pacientes con AOS y obesidad con IMC > 35 se recomienda como tratamiento inicial de la enfermedad la cirugía bariátrica. En pacientes con IMC 30-40, no hay contraindicación absoluta a la cirugía, debiendo individualizarse cada caso, asociando el tratamiento dietético y el cambio del estilo de vida a la cirugía.

## **CONCLUSIONES**

- Se han realizado importantes modificaciones en el protocolo original de Stanford que reflejan una mayor comprensión de la fisiopatología de la apnea obstructiva del sueño, permiten un adecuado diagnóstico y estadificación de los pacientes, así como una correcta selección del tratamiento más beneficioso.
- El nuevo algoritmo se basa en la **precisión** en la **selección del paciente**, **selección del procedimiento** y **exactitud en el desarrollo del mismo**.
- La definición de éxito quirúrgico no puede basarse solo en la mejoría del IAH, sino que debe incluir otros parámetros como la calidad de vida o los episodios cardiovasculares, sobre todo a largo plazo.
- En función de los hallazgos en la exploración clínica, radiológica y en la DISE, los tratamientos quirúrgicos deben seleccionarse de forma adecuada:
  - Si se objetiva una hipertrofia amigdalara llamativa, el tratamiento será la amigdalectomía.
  - Si se objetiva patología nasal que dificulta la tolerancia a la CPAP, la cirugía nasal debe indicarse lo antes posible.
  - Si en la DISE se objetivan colapsos en el paladar y en la pared lateral de la orofaringe, debe valorarse individualmente la cirugía palatofaríngea.
  - Si en la DISE el colapso está en la base de la lengua, puede indicarse una cirugía de resección lingual, como CELL o TORS, pero debe considerarse también el avance geniogloso y la neuroestimulación del nervio hipogloso.
  - Si existen alteraciones dentofaciales, AOS severa o en la DISE hay colapso concéntrico, debe recomendarse el avance bimaxilar.
- La cirugía multinivel o el avance maxilomandibular en combinación con la estimulación de la vía aérea superior podrían conseguir curaciones a largo plazo.
- Hacen falta más estudios aleatorizados y con seguimiento a largo plazo para definir mejor los resultados y establecer criterios para unificar las técnicas quirúrgicas.

## BIBLIOGRAFÍA

1. Liu SY, Wayne Riley R, Pogrel A, Guilleminault C. Sleep surgery in the era of precision medicine. *Atlas Oral Maxillofac Surg Clin North Am* 2019;27(1):1-5.
2. Esteller E, Carrasco M, Díaz-Herrera MÁ, Vila J, Sampol G, Juvanteny J, et al. Recomendaciones de la Guía de Práctica Clínica de la exploración de la vía aérea superior para pacientes adultos con sospecha de síndrome de apnea-hipoapnea obstructiva del sueño (versión reducida). *Acta Otorrinolaringol Esp* 2019;pii: S0001-6519(18)30172-9.
3. Friedman M, Salapatras AM, Bonzelaar LB. Updated Friedman staging system for obstructive sleep apnea. *Adv Otorhinolaryngol* 2017;80:41-8.
4. Carrasco Llatas M, Martínez Ruiz de Apodaca P, Baptista Jardín P, O'Connor Reina C, Plaza Mayor G, Méndez-Benegassi Silva I, et al. Endoscopia inducida por sueño. *Acta Otorrinolaringol Esp* 2019;pii: S0001-6519(19)30068-8.
5. Certal VF, Pratas R, Guimarães L, Lugo R, Tsou Y, Camacho M, et al. Awake examination versus DISE for surgical decision making in patients with OSA: A systematic review. *Laryngoscope* 2016;126(3):768-74.
6. Borowiecki B, Pollak CP, Weitzman ED, Rakoff S, Imperato J. Fibro-optic study of pharyngeal airway during sleep in patients with hypersomnia obstructive sleep-apnea syndrome. *Laryngoscope* 1978;88:1310-3.
7. Croft CB, Pringle M. Sleep nasendoscopy: a technique of assessment in snoring and obstructive sleep apnoea. *Clin Otolaryngol Allied Sci* 1991;16:504-9.
8. De Vito A, Carrasco Llatas M, Vanni A, Bosi M, Braghiroli A, Campanini A, et al. European position paper on drug-induced sedation endoscopy (DISE). *Sleep Breath* 2014;18:453-65.
9. De Vito A, Carrasco Llatas M, Ravesloot MJ, Kotecha B, De Vries N, Hamans E, et al. European position paper on drug-induced sleep endoscopy: 2017 Update. *Clin Otolaryngol* 2018;43(6):1541-52.
10. Hohenhorst W, Ravesloot MJL, Kezirian EJ, de Vries N. Drug-induced sleep endoscopy in adults with sleep-disordered breathing: Technique and the VOTE Classification system. *Oper Tech Otolaryngol* 2012;23:11-8.
11. Dijemeni E, D'Amone G, Gbati I. Drug-induced sedation endoscopy (DISE) classification systems: a systematic review and meta-analysis. *Sleep Breath* 2017;21(4):983-94.
12. Blumen M, Bequignon E, Chabolle F. Drug-induced sleep endoscopy: A new gold standard for evaluating OSAS? Part II: Results. *Eur Ann Otorhinolaryngol Head Neck Dis* 2017;134(2):109-15.
13. Eichler C, Sommer JU, Stuck BA, Hörmann K, Maurer JT. Does drug-induced sleep endoscopy change the treatment concept of patients with snoring and obstructive sleep apnea? *Sleep Breath* 2013;17(1):63-8.

14. Fernández-Julián E, García-Pérez MÁ, García-Callejo J, Ferrer F, Martí F, Marco J. Surgical planning after sleep versus awake techniques in patients with obstructive sleep apnea. *Laryngoscope* 2014;124(8):1970-4.
15. Zepa Zepa V, Carrasco Llatas M, Agostini Porras G, Dalmau Galofre J. Drug-induced sedation endoscopy versus clinical exploration for the diagnosis of severe upper airway obstruction in OAS patients. *Sleep Breath* 2015;19(4):1367-72.
16. Lee EJ, Cho JH. Meta-analysis of obstruction site observed with drug-induced sleep endoscopy in patients with obstructive sleep apnea. *Laryngoscope* 2019;129(5):1235-43.
17. Wang Y, Sun C, Cui X, Guo Y, Wang Q, Liang H. The role of drug-induced sleep endoscopy: predicting and guiding upper airway surgery for adult OSA patients. *Sleep Breath* 2018;22(4):925-31.
18. Chong KB, De Vito A, Vicini C. Drug-Induced Sleep Endoscopy in Treatment Options Selection. *Sleep Med Clin* 2019;14(1):33-40.
19. Green KK, Kent DT, D'Agostino MA, Hoff PT, Lin HS, Soose RJ et al. Drug-induced sleep endoscopy and surgical outcomes: A multicenter cohort study. *Laryngoscope* 2019;129(3):761-70.
20. Blumen MB, Latournerie V, Bequignon E, Guillere L, Chabolle F. Are the obstruction sites visualized on drug-induced sleep endoscopy reliable? *Sleep Breath* 2015;19(3):1021-6.
21. Pang KP, Baptista PM, Olszewska E, Braverman I, Carrasco-Llatas M, Kishore S, et al. Does drug-induced sleep endoscopy affect surgical outcome? A multicenter study of 326 obstructive sleep apnea patients. *Laryngoscope* 2019. doi: 10.1002/lary.27987.
22. Neelapu BC, Kharbanda OP, Sardana HK, Balachandran R, Sardana V, Kapoor P, et al. Craniofacial and upper airway morphology in adult obstructive sleep apnea patients: A systematic review and meta-analysis of cephalometric studies. *Sleep Med Rev* 2017;31:79-90.
23. Fusco G, Macina F, Macarini L, Garribba AP, Ettorre GC. Magnetic resonance imaging in simple snoring and obstructive sleep apnea-hypopnea syndrome. *Radiol Med* 2004;108(3):238-54.
24. Gottsauner-Wolf S, Laimer J, Bruckmoser E. Posterior airway changes following orthognathic surgery in obstructive sleep apnea. *J Oral Maxillofac Surg* 2018;76(5):1093.e1-1093.e21.
25. Jang SI, Ahn J, Paeng JY, Hong J. Three-dimensional analysis of changes in airway space after bimaxillary orthognathic surgery with maxillomandibular setback and their association with obstructive sleep apnea. *Maxillofac Plast Reconstr Surg* 2018;40(1):33.
26. Liu SY, Awad M, Riley R, Capasso R. The role of the revised Stanford protocol in today's precision medicine. *Sleep Med Clin* 2019;14(1):99-107.

27. Sher AE, Schechtman KB, Piccirillo JF. The efficacy of surgical modifications of the upper airway in adults with obstructive sleep apnea syndrome. *Sleep* 1996;19(2):156-77.
28. Pang KP, Rotenberg BW. The SLEEP GOAL as a success criteria in obstructive sleep apnea therapy. *Eur Arch Otorhinolaryngol* 2016;273(5):1063-5.
29. Cammaroto G, Costa F, Ruiz MVG, Andò G, Vicini C, Montevercchi F, et al. Obstructive sleep apnoea syndrome and endothelial function: potential impact of different treatment strategies-meta-analysis of prospective studies. *Eur Arch Otorhinolaryngol* 2019. doi: 10.1007/s00405-019-05486-6.
30. Weaver EM, Maynard C, Yueh B. Survival of veterans with sleep apnea: continuous positive airway pressure versus surgery. *Otolaryngol Head Neck Surg* 2004;130(6):659-65.
31. Camacho M, Chang ET, Neighbors CLP, Noller MW, Mack D, Capasso R, et al. Thirty-five alternatives to positive airway pressure therapy for obstructive sleep apnea: an overview of meta-analyses. *Expert Rev Respir Med* 2018;12(11):919-29.
32. Camacho M, Malu OO, Kram YA, Nigam G, Riaz M, Song SA, et al. Nasal dilators (Breathe Right Strips and NoZovent) for snoring and OSA: A systematic review and meta-Analysis. *Pulm Med* 2016;2016:4841310.
33. Li HY, Wang PC, Chen YP, Lee LA, Fang TJ, Lin HC. Critical appraisal and meta-analysis of nasal surgery for obstructive sleep apnea. *Am J Rhinol Allergy* 2011;25(1):45-9.
34. Ishii L, Roxbury C, Godoy A, Ishman S, Ishii M. Does nasal surgery improve OSA in patients with nasal obstruction and OSA? A meta-analysis. *Otolaryngol-Head Neck Surg* 2015;153(3):326-33.
35. Sharma S, Wormald JCR, Fishman JM, Andrews P, Kotecha BT. Rhinological interventions for obstructive sleep apnoea - a systematic review and descriptive meta-analysis. *J Laryngol Otol* 2019;133(3):168-76.
36. Wang M, Liu SY, Zhou B, Li Y, Cui S, Huang Q. Effect of nasal and sinus surgery in patients with and without obstructive sleep apnea. *Acta Otolaryngol* 2019;139(5):467-72.
37. Camacho M, Riaz M, Capasso R, Ruoff CM, Guilleminault C, Kushida CA, et al. The effect of nasal surgery on continuous positive airway pressure device use and therapeutic treatment pressures: A systematic review and meta-analysis. *Sleep* 2015;38(2):279-86.
38. Rotenberg BW, Theriault J, Gottesman S. Redefining the timing of surgery for obstructive sleep apnea in anatomically favorable patients. *Laryngoscope* 2014;124(Suppl 4):S1-9.
39. Baudouin R, Blumen M, Chaufton C, Chabolle F. Adult sleep apnea and tonsil hypertrophy: should pharyngoplasty be associated with tonsillectomy? *Sleep Breath* 2019. doi: 10.1007/s11325-019-01864-w.

40. Camacho M, Li D, Kawai M, Zaghi S, Teixeira J, Senchak AJ, et al. Tonsillectomy for adult obstructive sleep apnea: A systematic review and meta-analysis. *Laryngoscope* 2016;126(9):2176-86.
41. Reckley LK, Fernández-Salvador C, Camacho M. The effect of tonsillectomy on obstructive sleep apnea: an overview of systematic reviews. *Nat Sci Sleep*. 2018 Apr 4;10:105-10.
42. Friedmann M, Wilson M, Lin H, Chang H. Updated systematic review of tonsillectomy and adenoidectomy for treatment of pediatric obstructive sleep apnea/hypopnea syndrome. *Otolaryngol Head Neck Surg* 2009;140:800-8.
43. Venekamp RP, Hearne BJ, Chandrasekharan D, Blackshaw H, Lim J, Schilder AG. Tonsillectomy or adenotonsillectomy versus non-surgical management for obstructive sleep-disordered breathing in children. *Cochrane Database Syst Rev* 2015;(10):CD011165.
44. Zhang LY, Zhong L, David M, Cervin A. Tonsillectomy or tonsillotomy? A systematic review for paediatric sleep-disordered breathing. *Int J Pediatr Otorhinolaryngol* 2017;103:41-50.
45. Kim JS, Kwon SH, Lee EJ, Yoon YJ. Can intracapsular tonsillectomy be an alternative to classical tonsillectomy? A meta-analysis. *Otolaryngol Head Neck Surg* 2017;157(2):178-89.
46. Wong Chung JERE, van Benthem PPG, Blom HM. Tonsillotomy versus tonsillectomy in adults suffering from tonsil-related afflictions: a systematic review. *Acta Otolaryngol* 2018;138(5):492-501.
47. Jacobowitz O. Algorithm for surgery: Palatopharyngoplasty first and foremost. En: Friedman M, Jacobowitz O. *Sleep Apnea and Snoring: Surgical and Non-Surgical Therapy*. NY: Elsevier. 2nd edition. 2019. p. 99-103.
48. Fujita S, Conway W, Zorick F, Roth T. Surgical correction of anatomic abnormalities in obstructive sleep apnea syndrome: uvulopalatopharyngoplasty. *Otolaryngol Head Neck Surg* 1981;89(6):923-34.
49. Fujita S, Conway WA, Zorick FJ, Sickelsteel JM, Roehrs TA, Wittig RM, et al. Evaluation of the effectiveness of uvulopalatopharyngoplasty. *Laryngoscope* 1985;95(1):70-4.
50. Caples SM, Rowley JA, Prinsell JR, Pallanch JF, Elamin MB, Katz SG, et al. Surgical modifications of the upper airway for obstructive sleep apnea in adults: a systematic review and meta-analysis. *Sleep* 2010;33(10):1396-407.
51. Braga A, Carboni LH, do Lago T, Küpper DS, Eckeli A, Valera FC. Is uvulopalatopharyngoplasty still an option for the treatment of obstructive sleep apnea? *Eur Arch Otorhinolaryngol* 2013;270(2):549-54.
52. Choi JH, Cho SH, Kim SN, Suh JD, Cho JH. Predicting outcomes after uvulopalatopharyngoplasty for adult obstructive sleep apnea: A meta-analysis. *Otolaryngol Head Neck Surg* 2016;155(6):904-13.
53. He M, Yin G, Zhan S, Xu J, Cao X, Li J, et al. Long-term efficacy of uvulopalatopharyngoplasty among adult patients with obstructive sleep apnea:

- A systematic review and meta-analysis. *Otolaryngol Head Neck Surg* 2019;11:194599819840356. doi: 10.1177/0194599819840356.
54. Krespi YP, Pearlman SJ. Laser assisted uvulopalatoplasty for the treatment of snoring. *Curr Opin Otolaryngol Head Neck* 1995;3:95-200.
  55. Camacho M, Nesbitt NB, Lambert E, Song SA, Chang ET, Liu SY, et al. Laser-assisted uvulopalatoplasty for obstructive sleep apnea: A systematic review and meta-analysis. *Sleep* 2017;40(3).
  56. Wischhusen J, Qureshi U, Camacho M. Laser-assisted uvulopalatoplasty (LAUP) complications and side effects: a systematic review. *Nat Sci Sleep* 2019;11:59-67.
  57. Clarke RW, Yardley MP, Davies CM, Panarese A, Clegg RT, Parker AJ. Palatoplasty for snoring: a randomized controlled trial of three surgical methods. *Otolaryngol Head Neck Surg* 1998;119(3):288-92.
  58. Bäck LJ, Hytönen ML, Roine RP, Malmivaara AO. Radiofrequency ablation treatment of soft palate for patients with snoring: a systematic review of effectiveness and adverse effects. *Laryngoscope* 2009;119(6):1241-50.
  59. Mair EA, Day RH. Cautery-assisted palatal stiffening operation. *Otolaryngol Head Neck Surg* 2000;122(4):547-56.
  60. Llewellyn CM, Noller MW, Camacho M. Cautery-assisted palatal stiffening operation for obstructive sleep apnea: A systematic review and meta-analysis. *World J Otorhinolaryngol Head Neck Surg* 2018;5(1):49-56.
  61. Nordgård S, Stene BK, Skjøstad KW. Soft palate implants for the treatment of mild to moderate obstructive sleep apnea. *Otolaryngol Head Neck Surg* 2006;134(4):565-70.
  62. Steward DL, Huntley TC, Woodson BT, Surdulescu V. Palate implants for obstructive sleep apnea: multi-institution, randomized, placebo-controlled study. *Otolaryngol Head Neck Surg* 2008;139(4):506-10.
  63. Choi JH, Kim SN, Cho JH. Efficacy of the Pillar implant in the treatment of snoring and mild-to-moderate obstructive sleep apnea: a meta-analysis. *Laryngoscope* 2013;123(1):269-76.
  64. Stuck BA, Ravesloot M. Uvulopalatopharyngoplasty. En: Verse T, de Vries N. *Current Concepts of Sleep Apnea Surgery*. Stuttgart: Thieme. 1st Edition; 2019. doi: 10.1055/b-006-161130.
  65. Sommer UJ, Heiser C, Gahleitner C, Herr RM, Hörmann K, Maurer JT, et al. Tonsillectomy with uvulopalatopharyngoplasty in obstructive sleep apnea. *Dtsch Arztebl Int* 2016;113(1-02):1-8.
  66. Browaldh N, Nerfeldt P, Lysdahl M, Bring J, Friberg D. SKUP3 randomised controlled trial: polysomnographic results after uvulopalatopharyngoplasty in selected patients with obstructive sleep apnoea. *Thorax* 2013;68(9):846-53.
  67. Browaldh N, Bring J, Friberg D. SKUP(3) RCT; continuous study: Changes in sleepiness and quality of life after modified UPPP. *Laryngoscope* 2016;126(6):1484-91.

68. Fehrm J, Friberg D, Bring J, Browaldh N. Blood pressure after modified uvulopalatopharyngoplasty: results from the SKUP(3) randomized controlled trial. *Sleep Med* 2017;34:156-61.
69. Browaldh N, Bring J, Friberg D. SKUP(3): 6 and 24 months follow-up of changes in respiration and sleepiness after modified UPPP. *Laryngoscope* 2018;128(5):1238-44.
70. Sundman J, Friberg D, Bring J, Lowden A, Nagai R, Browaldh N. Sleep quality after modified uvulopalatopharyngoplasty: Results from the SKUP3 randomized controlled trial. *Sleep* 2018;41(11). doi: 10.1093/sleep/zsy173.
71. Friberg D, Sundman J, Browaldh N. Long-term evaluation of satisfaction and side effects after modified uvulopalatopharyngoplasty. *Laryngoscope* 2019. doi: 10.1002/lary.27917.
72. Stuck BA, Ravesloot MJL, Eschenhagen T, de Vet HCW, Sommer JU. Uvulopalatopharyngoplasty with or without tonsillectomy in the treatment of adult obstructive sleep apnea - A systematic review. *Sleep Med* 2018;50:152-65.
73. O'Connor C, García-Iriarte M, Casado JC, Plaza G, Gómez-Ángel D. Evolution of palate surgery for the treatment of snoring and obstructive sleep apnea-hypopnea syndrome (OAOS): pharyngoplasties. En: Plaza G, Baptista P, O'Connor C (eds.). *Sleep-Disordered Breathing: Diagnosis and Treatment*. Barcelona: INDICA. 2017. p. 265-319.
74. Lugo Saldaña R. *Surgical Management in Snoring and Sleep-Disordered Breathing*. New Delhi: Jaypee. 2017.
75. Elsobki A, Cahali MB, Kahwagi M. LwPTL: a novel classification for upper airway collapse in sleep endoscopies. *Braz J Otorhinolaryngol* 2019;85(3):379-87.
76. Pang KP, Tan R, Puraviappan P, Terris DJ. Anterior palatoplasty for the treatment of OSA: three-year results. *Otolaryngol Head Neck Surg* 2009;141(2):253-6.
77. Pang KP, Woodson BT. Expansion sphincter pharyngoplasty, a new technique for the treatment of obstructive sleep apnea. *Otolaryngol Head Neck Surg* 2007;137(1):110-4.
78. Cahali MB. Lateral pharyngoplasty: a new treatment for obstructive sleep apnea hypopnea syndrome. *Laryngoscope* 2003;113(11):1961-8.
79. Vicini C, Hendawy E, Campanini A, Eesa M, Bahgat A, AlGhamdi S, et al. Barbed reposition pharyngoplasty (BRP) for OAOS: a feasibility, safety, efficacy and teachability pilot study. "We are on the giant's shoulders". *Eur Arch Otorhinolaryngol* 2015;272(10):3065-70.
80. Carrasco-Llatas M, Marcano-Acuña M, Zepa-Zerpa V, Dalmau-Galofre J. Surgical results of different palate techniques to treat oropharyngeal collapse. *Eur Arch Otorhinolaryngol* 2015;272(9):2535-40.

81. Martínez Ruiz de Apodaca P, Carrasco Llatas M, Valenzuela Gras M, Dalmau Galofre J. Improving surgical results in velopharyngeal surgery: our experience in the last decade. *Acta Otorrinolaringol Esp*. 2020;71(4):197-203.
82. Pang KP, Pang EB, Win MT, Pang KA, Woodson BT. Expansion sphincter pharyngoplasty for the treatment of OSA: a systemic review and meta-analysis. *Eur Arch Otorhinolaryngol* 2016;273(9):2329-33.
83. Camacho M, Zaghi S, Piccin O, Certal V. Expansion sphincter pharyngoplasty for obstructive sleep apnea: an update to the recent meta-analysis. *Eur Arch Otorhinolaryngol* 2016;273(9):2857-8.
84. Pang KP, Pang EB, Pang KA, Rotenberg B. Anterior palatoplasty in the treatment of obstructive sleep apnoea - a systemic review. *Acta Otorhinolaryngol Ital* 2018;38(1):1-6.
85. Pang KP, Plaza G, Baptista J PM, O'Connor Reina C, Chan YH, Pang KA, Pang EB, et al. Palate surgery for obstructive sleep apnea: a 17-year meta-analysis. *Eur Arch Otorhinolaryngol* 2018;275(7):1697-707.
86. Cammaroto G, Marco L, Iannella G, Meccariello G, Zhang H, Yassin A , et al. Manipulation of lateral pharyngeal wall muscles in sleep surgery: a review of the literature. *Int. J. Environ. Res. Public Health* 2020, 17, 5315.
87. Moffa A, Rinaldi V, Mantovani M, Pierri M, Fiore V, Costantino A, et al. Different barbed pharyngoplasty techniques for retropalatal collapse in obstructive sleep apnea patients: a systematic review. *Sleep Breath*. 2020 Sep;24(3):1115-1127.
88. Woodson BT, Toohill RJ. Transpalatal advancement pharyngoplasty for obstructive sleep apnea. *Laryngoscope* 1993;103(3):269-76.
89. Volner K, Dunn B, Chang ET, Song SA, Liu SY, Brietzke SE, et al. Transpalatal advancement pharyngoplasty for obstructive sleep apnea: a systematic review and meta-analysis. *Eur Arch Otorhinolaryngol* 2017;274(3):1197-203.
90. Mansukhani MP, Olson EJ, Caples SM. Upper Airway Surgery for Obstructive Sleep Apnea. *JAMA*. 2020 Sep 22;324(12):1161-1162.
91. MacKay S, Carney AS, Catcheside PG, Chai-Coetzer CL, Chia M, et al. Effect of Multilevel Upper Airway Surgery vs Medical Management on the Apnea-Hypopnea Index and Patient-Reported Daytime Sleepiness Among Patients With Moderate or Severe Obstructive Sleep Apnea: The SAMS Randomized Clinical Trial. *JAMA*. 2020 Sep 22;324(12):1168-1179.
92. Pirelli P, Saponara M, Guilleminault C. Rapid maxillary expansion (RME) for pediatric obstructive sleep apnea: a 12-year follow-up. *Sleep Med* 2015;16(8):933-5.
93. Liu SY, Guilleminault C, Huon LK, Yoon A. Distraction osteogenesis maxillary expansion (DOME) for adult obstructive sleep apnea patients with high arched palate. *Otolaryngol Head Neck Surg* 2017;157(2):345-8.
94. Camacho M, Chang ET, Song SA, Abdullatif J, Zaghi S, Pirelli P, et al. Rapid maxillary expansion for pediatric obstructive sleep apnea: A systematic review and meta-analysis. *Laryngoscope* 2017;127(7):1712-9.
95. Abdullatif J, Certal V, Zaghi S, Song SA, Chang ET, Gillespie MB, et al. Maxillary expansion and maxillomandibular expansion for adult OSA: A

- systematic review and meta-analysis. *J Craniomaxillofac Surg* 2016;44(5):574-8.
96. Mulholland GB, Jeffery CC, Ziai H, Hans V, Seikaly H, Pang KP, et al. Multilevel palate and tongue base surgical treatment of obstructive sleep apnea: A systematic review and meta-analysis. *Laryngoscope* 2019;129(7):1712-21.
97. Verse T, Wenzel S, Brus J. Multi-level surgery for obstructive sleep apnea. Lingual tonsillectomy vs. hyoid suspension in combination with radiofrequency of the tongue base. *Sleep Breath* 2015;19(4):1361-6.
98. Samutsakorn P, Hirunwiwatkul P, Chaitusaney B, Charakorn N. Lingual tonsillectomy with palatal surgery for the treatment of obstructive sleep apnea in adults: a systematic review and meta-analysis. *Eur Arch Otorhinolaryngol* 2018;275(4):1005-13.
99. Woodson BT. Updated Hypopharyngeal Surgery for Sleep Apnea. *Adv Otorhinolaryngol* 2017;80:81-9.
100. Den Herder C, van Tinteren H, de Vries N. Hyoidthyroidpexia: a surgical treatment for sleep apnea syndrome. *Laryngoscope* 2005;115:740-5.
101. Song SA, Wei JM, Buttram J, Tolisano AM, Chang ET, Liu SY, et al. Hyoid surgery alone for obstructive sleep apnea: A systematic review and meta-analysis. *Laryngoscope* 2016;126(7):1702-8.
102. Vicente E, Marín JM, Carrizo S, Naya MJ. Tongue-base suspension in conjunction with uvulopalatopharyngoplasty for treatment of severe obstructive sleep apnea: long-term follow-up results. *Laryngoscope* 2006;116:1223-7.
103. Handler E, Hamans E, Goldberg AN, Mickelson S. Tongue suspension: an evidence-based review and comparison to hypopharyngeal surgery for OSA. *Laryngoscope* 2014;124(1):329-36.
104. Chang ET, Fernández-Salvador C, Giambo J, Nesbitt B, Liu SY, Capasso R, et al. Tongue retaining devices for obstructive sleep apnea: A systematic review and meta-analysis. *Am J Otolaryngol* 2017;38(3):272-8.
105. Fernández-Julián E, Muñoz N, Achiques MT, García-Pérez MA, Orts M, Marco J. Randomized study comparing two tongue base surgeries for moderate to severe obstructive sleep apnea syndrome. *Otolaryngol Head Neck Surg* 2009;140:917-23.
106. Murphey AW, Kandl JA, Nguyen SA, Weber AC, Gillespie MB. The effect of glossectomy for obstructive sleep apnea: A systematic review and meta-analysis. *Otolaryngol Head Neck Surg* 2015;153(3):334-42.
107. Li S, Shi H. Lingual artery CTA-guided midline partial glossectomy for treatment of obstructive sleep apnea hypopnea syndrome. *Acta Otolaryngol* 2013;133:749-54.
108. Li HY, Lee LA, Kezirian EJ. Efficacy of coblation endoscopic lingual lightening in multilevel surgery for obstructive sleep apnea. *JAMA Otolaryngol Head Neck Surg* 2016;142(5):438-43.

109. Justin GA, Chang ET, Camacho M, Brietzke SE. Transoral robotic surgery for obstructive sleep apnea: A systematic review and meta-analysis. *Otolaryngol Head Neck Surg* 2016;154(5):835-46.
110. Meccariello G, Cammaroto G, Montevecchi F, Hoff PT, Spector ME, Negm H, et al. Transoral robotic surgery for the management of obstructive sleep apnea: a systematic review and meta-analysis. *Eur Arch Otorhinolaryngol* 2017;274(2):647-53.
111. Miller SC, Nguyen SA, Ong AA, Gillespie MB. Transoral robotic base of tongue reduction for obstructive sleep apnea: A systematic review and meta-analysis. *Laryngoscope* 2017;127(1):258-65.
112. Cammaroto G, Montevecchi F, D'Agostino G, Zeccardo E, Bellini C, Galletti B, et al. Tongue reduction for OAOS: TORs vs coblations, technologies vs techniques, apples vs oranges. *Eur Arch Otorhinolaryngol* 2017;274(2):637-45.
113. Lee JA, Byun YJ, Nguyen SA, Lentsch EJ, Gillespie MB. Transoral Robotic Surgery versus Plasma Ablation for Tongue Base Reduction in Obstructive Sleep Apnea: Meta-analysis. *Otolaryngol Head Neck Surg*. 2020 Jun;162(6):839-852.
114. Torre C, Camacho M, Liu SY, Huon LK, Capasso R. Epiglottis collapse in adult obstructive sleep apnea: A systematic review. *Laryngoscope* 2016;126(2):515-23.
115. Kwon OE, Jung SY, Al-Dilaijan K, Min JY, Lee KH, Kim SW. Is epiglottis surgery necessary for obstructive sleep apnea patients with epiglottis obstruction? *Laryngoscope* 2019. doi: 10.1002/lary.27808.
116. Camacho M, Dunn B, Torre C, Sasaki J, Gonzales R, Liu SY, et al. Supraglottoplasty for laryngomalacia with obstructive sleep apnea: A systematic review and meta-analysis. *Laryngoscope* 2016;126(5):1246-55.
117. Farhood Z, Ong AA, Nguyen SA, Gillespie MB, Discolo CM, White DR. Objective outcomes of supraglottoplasty for children with laryngomalacia and obstructive sleep apnea: A meta-analysis. *JAMA Otolaryngol Head Neck Surg* 2016;142(7):665-71.
118. Lee CF, Hsu WC, Lee CH, Lin MT, Kang KT. Treatment outcomes of supraglottoplasty for pediatric obstructive sleep apnea: A meta-analysis. *Int J Pediatr Otorhinolaryngol* 2016;87:18-27.
119. Scheffler P, Wolter NE, Narang I, Amin R, Holler T, Ishman SL, et al. Surgery for obstructive sleep apnea in obese children: Literature review and meta-analysis. *Otolaryngol Head Neck Surg* 2019;160(6):985-92.
120. Cheng A. Genioglossus and genioplasty advancement. *Atlas Oral Maxillofac Surg Clin North Am* 2019;27(1):23-8.
121. Rojas R, Chateau R, Gaete C, Muñoz C. Genioglossus muscle advancement and simultaneous sliding genioplasty in the management of sleep apnoea. *Int J Oral Maxillofac Surg* 2018;47(5):638-41.

122. Song SA, Chang ET, Certal V, Del Do M, Zaghi S, Liu SY, et al. Genial tubercle advancement and genioplasty for obstructive sleep apnea: A systematic review and meta-analysis. *Laryngoscope* 2017;127(4):984-92.
123. Leung YY, Lai KKY. Management of obstructive sleep apnoea: an update on the role of distraction osteogenesis. *Curr Opin Otolaryngol Head Neck Surg* 2018;26(4):214-20.
124. Rubio-Bueno P, Landete P, Ardanza B, Vázquez L, Soriano JB, Wix R, et al. Maxillomandibular advancement as the initial treatment of obstructive sleep apnoea: Is the mandibular occlusal plane the key? *Int J Oral Maxillofac Surg* 2017;46(11):1363-71.
125. Cillo JE Jr, Dattilo DJ. Maxillomandibular advancement for severe obstructive sleep apnea is a highly skeletally stable long-term procedure. *J Oral Maxillofac Surg* 2019;77(6):1231-6.
126. Liu SY, Awad M, Riley RW. Maxillomandibular advancement: Contemporary approach at Stanford. *Atlas Oral Maxillofac Surg Clin North Am* 2019;27(1):29-36.
127. Rojo-Sanchis C, Almerich-Silla JM, Paredes-Gallardo V, Montiel-Company JM, Bellot-Arcís C. Impact of bimaxillary advancement surgery on the upper airway and on obstructive sleep apnea syndrome: A meta-Analysis. *Sci Rep* 2018;8(1):5756.
128. John CR, Gandhi S, Sakharía AR, James TT. Maxillomandibular advancement is a successful treatment for obstructive sleep apnoea: a systematic review and meta-analysis. *Int J Oral Maxillofac Surg* 2018;47(12):1561-71.
129. Zaghi S, Holty JE, Certal V, Abdullatif J, Guilleminault C, Powell NB, et al. Maxillomandibular advancement for treatment of obstructive sleep apnea: A meta-analysis. *JAMA Otolaryngol Head Neck Surg* 2016;142(1):58-66.
130. Holty JE, Guilleminault C. Maxillomandibular advancement for the treatment of obstructive sleep apnea: A systematic review and meta-analysis. *Sleep Med Rev* 2010;14(5):287-97.
131. Camacho M, Noller MW, Del Do M, Wei JM, Gouveia CJ, Zaghi S, et al. Long-term results for maxillomandibular advancement to treat obstructive sleep apnea: A meta-analysis. *Otolaryngol Head Neck Surg* 2019;160(4):580-93.
132. Van de Heyning PH, Badr MS, Baskin JZ, Cramer Bornemann MA, De Backer WA, Dotan Y, et al. Implanted upper airway stimulation device for obstructive sleep apnea. *Laryngoscope* 2012;122(7):1626-33.
133. Strollo PJ Jr, Soose RJ, Maurer JT, de Vries N, Cornelius J, Froymovich O, et al; STAR Trial Group. Upper-airway stimulation for obstructive sleep apnea. *N Engl J Med* 2014;370(2):139-49.
134. Ong AA, Murphey AW, Nguyen SA, Soose RJ, Woodson BT, Vanderveken OM, et al. Efficacy of upper airway stimulation on collapse patterns observed during drug-induced sedation endoscopy. *Otolaryngol Head Neck Surg* 2016;154(5):970-7.

135. Mediano O, Romero-Peralta S, Resano P, Cano-Pumarega I, Sánchez-de-la-Torre M, Castillo-García M, et al. Obstructive Sleep Apnea: Emerging Treatments Targeting the Genioglossus Muscle. *J Clin Med* 2019;8(10):E1754. doi: 10.3390/jcm8101754.
136. Strollo PJ Jr, Gillespie MB, Soose RJ, Maurer JT, de Vries N, Cornelius J, et al; Stimulation Therapy for Apnea Reduction (STAR) Trial Group. Upper airway stimulation for obstructive sleep apnea: Durability of the treatment effect at 18 months. *Sleep* 2015;38(10):1593-8.
137. Soose RJ, Woodson BT, Gillespie MB, Maurer JT, de Vries N, Steward DL, et al; STAR Trial Investigators. Upper airway stimulation for obstructive sleep apnea: Self-reported outcomes at 24 months. *J Clin Sleep Med* 2016;12(1):43-8.
138. Woodson BT, Soose RJ, Gillespie MB, Strohl KP, Maurer JT, de Vries N, et al; STAR Trial Investigators. Three-Year Outcomes of Cranial Nerve Stimulation for Obstructive Sleep Apnea: The STAR Trial. *Otolaryngol Head Neck Surg* 2016;154(1):181-8.
139. Gillespie MB, Soose RJ, Woodson BT, Strohl KP, Maurer JT, de Vries N, et al; STAR trial investigators. Upper airway stimulation for obstructive sleep apnea: Patient-reported outcomes after 48 months of follow-up. *Otolaryngol Head Neck Surg* 2017;156(4):765-71.
140. Woodson BT, Strohl KP, Soose RJ, Gillespie MB, Maurer JT, de Vries N, et al. Upper airway stimulation for obstructive sleep apnea: 5-year outcomes. *Otolaryngol Head Neck Surg* 2018;159(1):194-202.
141. Kompelli AR, Ni JS, Nguyen SA, Lentsch EJ, Neskey DM, Meyer TA. The outcomes of hypoglossal nerve stimulation in the management of OSA: A systematic review and meta-analysis. *World J Otorhinolaryngol Head Neck Surg*. 2018 Sep 25;5(1):41-48.
142. Costantino A, Rinaldi V, Moffa A, Luccarelli V, Bressi F, Cassano M, et al. Hypoglossal nerve stimulation long-term clinical outcomes: a systematic review and meta-analysis. *Sleep Breath* 2019. doi: 10.1007/s11325-019-01923-2.
143. Yu JL, Mahmoud A, Thaler ER. Transoral robotic surgery versus upper airway stimulation in select obstructive sleep apnea patients. *Laryngoscope* 2019;129(1):256-8.
144. Huntley C, Topf MC, Christopher V, Doghramji K, Curry J, Boon M. Comparing Upper Airway Stimulation to Transoral Robotic Base of Tongue Resection for Treatment of Obstructive Sleep Apnea. *Laryngoscope*. 2019 Apr;129(4):1010-1013.
145. Kovatch KJ, Ali SA, Hoff PT. The Rise of Upper Airway Stimulation in the Era of Transoral Robotic Surgery for Obstructive Sleep Apnea. *Otolaryngol Clin North Am*. 2020 Dec;53(6):1017-1029.

146. Certal VF, Zaghi S, Riaz M, Vieira AS, Pinheiro CT, Kushida C, et al. Hypoglossal nerve stimulation in the treatment of obstructive sleep apnea: A systematic review and meta-analysis. *Laryngoscope* 2015;125(5):1254-64.
147. Hofauer B, Steffen A, Knopf A, Hasselbacher K, Heiser C. Patient experience with upper airway stimulation in the treatment of obstructive sleep apnea. *Sleep Breath* 2019;23(1):235-41.
148. Camacho M, Certal V, Brietzke SE, Holty JE, Guilleminault C, Capasso R. Tracheostomy as treatment for adult obstructive sleep apnea: a systematic review and meta-analysis. *Laryngoscope* 2014;124(3):803-11.
149. Fray S, Biello A, Kwan J, Kram YA, Lu K, Camacho M. Tracheostomy for paediatric obstructive sleep apnoea: A systematic review. *J Laryngol Otol* 2018;132(8):680-4.
