# Supplementary material
Source: Elsevier journal article supplement (https://www.sciencedirect.com/science/article/pii/S0300289621001150)
Supplement: mmc14 [file S0300289621001150:mmc14.pdf]

## Capítulo 5

# Patologías del sueño en otros contextos

**Josep M. Montserrat** (editor). Unidad Multidisciplinar de Patología del Sueño y VNID, Servei Pneumologia, Institut Clínic Respiratori, Hospital Clínic, Barcelona, España; Universidad de Barcelona, Barcelona, Centro de Investigación Biomédica en Red de Enfermedades Respiratorias (CIBERES), Madrid, España.

**Neus Salord Oleo. Facultativo especialista. Unidad de trastornos respiratorios del sueño.** Servicio de Neumología. Hospital Universitario de Bellvitge. Barcelona. Instituto de Investigación Biomédica de Bellvitge de Bellvitge (IDIBELL). Barcelona.

### 5.1. Sueño y salud

El sueño es una función biológica esencial para la vida cuyo principal objetivo es la recuperación de energía y la supervivencia. Se ha demostrado que dormir bien es importante para funciones tan vitales como el desarrollo neuronal, aprendizaje, memoria, estabilidad emocional, función cardiovascular y metabólica, así como la eliminación de toxinas celulares, por lo que un sueño de buena calidad es crítico para el bienestar y la calidad de vida en general. A diferencia de otras funciones vitales, esta necesidad biológica determinada en parte genéticamente está sujeta a factores sociales, ambientales e interpersonales y depende en gran medida de comportamientos volitivos. A pesar de que hay un interés creciente entre el público en general sobre el sueño, que se ha hecho patente en los últimos años con el uso de dispositivos y aplicaciones móviles que aportan datos sobre el sueño y su calidad, en general se realizan pocas políticas sanitarias encaminadas a llevar a cabo programas para promocionar la importancia del sueño sobre la salud. Paralelamente hay poca formación para los profesionales sanitarios de diferentes niveles para promover un sueño saludable<sup>1,2</sup>.

### ¿Cuánto sueño es necesario?

Hay una marcada variación intra e interindividual sobre la cantidad de horas de sueño necesaria para una buena salud a lo largo de la vida, y esta variará según el género, los factores ambientales, sociales y genéticos<sup>2,3</sup> (**Tabla 1**). El sueño en los niños está claramente diferenciado del de los adultos. Un recién nacido pasa hasta un 70% del día durmiendo, con unos ciclos de sueño más cortos e inicio del sueño en la fase REM, y durante el proceso de maduración se irá consolidando el sueño no-REM (NREM). A lo largo de los años de preescolar el niño disminuye las siestas, consolida la mayor parte

del sueño durante la noche, disminuye el sueño REM hasta porcentajes parecidos a los adultos. En la edad escolar se van consolidando los ciclos de sueño con porcentajes de sueño NREM más elevados. Al entrar en la pubertad, la estructura del sueño es parecida a la de los adultos, pero se ha descrito la aparición de un retraso de fase con un retraso del inicio del sueño y de la hora del despertar. Este hecho puede estar agravado por hábitos sociales y horarios lectivos que conllevan un déficit de sueño, que el adolescente intenta compensar aumentando las horas de sueño el fin de semana<sup>1,4</sup>. Actuaciones como retrasar media hora el inicio del horario lectivo ha demostrado aumentar el tiempo total de sueño mejorando el estado de atención, motivación y estado de ánimo en adolescentes<sup>5</sup>. Paralelamente, el proceso del envejecimiento está asociado con cambios a nivel de la estructura (disminución del sueño profundo y duración del sueño), con un aumento de la dificultad de conciliar el sueño y de mantenerlo, por lo que el sueño es un proceso elemental, activo y complejo que está en constante cambio a lo largo de nuestra vida<sup>4</sup>. Hay una íntima relación entre los procesos de maduración y el sueño. En niños y adolescentes, el hecho de dormir regularmente la cantidad de horas recomendadas se asocia a mejor nivel de atención, comportamiento, aprendizaje, memoria, regulación emocional, calidad de vida y salud mental y física<sup>3</sup>.

Hay escasos datos en sobre los hábitos de sueño en España. Un estudio realizado en 2015 en Cataluña con 4.383 sujetos de edad adulta reveló que dormían una media de 7,18 h<sup>6</sup>. Sin embargo, lo más preocupante es el aumento de población con sueño insuficiente, ya que según datos del National Center for Chronic Disease Prevention and Health Promotion, el porcentaje de adultos que dormía  $\leq 6$  h en EE.UU. aumentó significativamente de un 22% en 1985 a un 29% en 2012<sup>7</sup>. Estos datos pueden estar infraestimados, ya que están basados en datos aportados por los individuos.

La mayoría de los estudios definen una duración de sueño corta al dormir menos de 6 h o menos de 7 h al día. Esta se ha asociado al aumento de peso y obesidad, diabetes, hipertensión, enfermedad cardiovascular, depresión y a un aumento de mortalidad por cualquier causa. Uno de los mecanismos a través de los que se ha sugerido que se pueda asociar a la duración de sueño corta y la enfermedad crónica es a través del desarrollo de obesidad. Se ha demostrado que el déficit de sueño aumenta la apetencia por comida poco saludable a través de la alteración de las hormonas reguladoras del hambre, aumenta la insulinoresistencia y tiene un efecto deletéreo sobre la función del adipocito y la célula pancreática. Adicionalmente, favorece un estado proinflamatorio. Dormir menos de 7 h también se ha asociado a una alteración de la función inmune, aumento del dolor, disminución de rendimiento cognitivo, aumento de errores y del riesgo de sufrir accidentes<sup>1,2</sup>.

El hecho de dormir más horas o tener un patrón de sueño largo (definido como dormir más de 9-10 horas al día) se ha asociado también a un aumento de la mortalidad por cualquier causa, sin embargo, no queda claro si esta relación es realmente causal o se relaciona con patología subyacente. De hecho, a pesar de que dormir más de 9 h se ha

relacionado con patología cardiovascular, hipertensión, diabetes y depresión, la evidencia no es tan contundente y existen algunos resultados controvertidos probablemente debidos a factores de confusión y a que el exceso de sueño podría ser una manifestación de un mal estado de salud basal. Paralelamente, dormir más de 9 h puede ser normal en adultos jóvenes y pacientes con déficit de sueño<sup>2</sup>.

**Tabla 1.** Horarios recomendados de sueño en función de la edad según AASM<sup>1</sup> y National Sleep Foundation<sup>2</sup>

| GRUPO DE EDAD  |            | HORAS/DÍA                                                                                              |
|----------------|------------|--------------------------------------------------------------------------------------------------------|
| Recién nacido  | 0-3 meses  | No recomendación según la AASM <sup>1</sup><br>14-17 h según la National Sleep Foundation <sup>2</sup> |
| Lactantes      | 4-12 meses | 12-16 h (incluyendo siestas) <sup>1</sup>                                                              |
| Niños pequeños | 1-3 años   | 11-14 h (incluyendo siestas) <sup>1</sup>                                                              |
| Preescolar     | 3-5 años   | 10-13 h (incluyendo siestas) <sup>1</sup>                                                              |
| Escolares      | 6-12 años  | 9-12 h <sup>1</sup>                                                                                    |
| Adolescentes   | 13-18 años | 8-10 h <sup>1</sup>                                                                                    |
| Adultos        | 18-60      | > 7 h <sup>1</sup>                                                                                     |
|                | 61-64      | 7-9 h <sup>2</sup>                                                                                     |
|                | > 65       | 7-8 h <sup>2</sup>                                                                                     |

AASM: American Academy of Sleep Medicine.

### Sueño saludable

Además del tiempo de sueño necesario, hay una evidencia creciente de que otras características del sueño, como el ritmo, la calidad de sueño, el estado de vigilancia durante el día, afectan a la salud. Los cambios horarios de sueño asociados al trabajo a turnos se han asociado al aumento de diabetes, el síndrome metabólico, de la enfermedad coronaria y al incremento de la mortalidad en general. Una mala calidad subjetiva de sueño y una baja eficiencia del sueño también se han relacionado a un aumento de la mortalidad, enfermedad coronaria, alteraciones metabólicas, hipertensión y a la cardiopatía isquémica. La disminución del estado de vigilia o somnolencia excesiva se ha relacionado a aumento del riesgo de enfermedad coronaria y a aumento de la mortalidad<sup>8</sup>.

La mayoría de estudios están focalizados en el impacto negativo del sueño y sin embargo no existe una definición estándar de sueño saludable. En una aproximación a una definición de sueño como concepto multidimensional en relación a la salud, Buysse (2014)<sup>8</sup> definió como sueño saludable al patrón de sueño-vigilia adaptado a las demandas individuales, sociales y ambientales que promueven el bienestar físico y mental. Asimismo, describió el sueño saludable como el caracterizado por una sensación subjetiva de sueño satisfactoria, con una cadencia y duración adecuada, una elevada eficiencia y estado de alerta mantenido durante las horas de vigilia. Siguiendo esta premisa, los primeros estudios apuntan que la medición del estado del sueño saludable mediante escalas autoadministradas basadas en estas dimensiones positivas del sueño permite discriminar mejor el estado de salud del individuo que simplemente la duración del sueño<sup>6,9</sup>.

En este sentido parece necesario establecer una definición consensuada multidimensional de sueño saludable, con el objetivo de establecer el sueño como una prioridad en los sistemas de salud y favorecer la educación de la población con objetivos concretos de promoción y prevención de la salud relacionada con el sueño.

Existen numerosos factores modificables que pueden tener impacto sobre la duración y calidad de sueño, desde factores ambientales como el ruido y la luz, factores socioeconómicos relacionados en tener un espacio adecuado y seguro para dormir, factores personales como responsabilidades laborales y familiares, así como factores culturales y recreativos. Por esta razón es necesario el desarrollo de estrategias de salud públicas encaminadas a promover buenos hábitos de sueño, con horarios de sueño suficientes ajustados a la edad de los individuos; políticas que modulen factores ambientales como el ruido y luz, que favorezcan el descanso, y políticas laborales que regulen la compatibilidad de horarios laborales con un sueño saludable.

### **Somnolencia y conducción**

Hay una clara evidencia de que la somnolencia, independientemente de su causa, es un importante factor de riesgo para los accidentes de tráfico. En la sociedad actual la somnolencia es un síntoma prevalente, de hecho, un estudio europeo realizado con base en 12.434 cuestionarios en 19 países estimó la prevalencia de “quedarse dormido al volante” en el 7%. Esta somnolencia se asociaba con un 3,6% de accidentes con consecuencias mortales y un 13,2% de accidentes que precisaron atención hospitalaria, aunque estos datos pueden estar infravalorados<sup>10</sup>.

Entre la población con un alto riesgo de padecer somnolencia conduciendo se encuentran los conductores profesionales, que tienen un mayor tiempo de exposición; los trabajadores con turnos de trabajo muy prolongados o trabajadores con turnos nocturnos; las personas que conducen con déficit de sueño, especialmente jóvenes, o

las que duermen menos de 6 h; aquellos que consumen fármacos con efectos sedantes, y finalmente las personas que tienen síntomas relacionados con la presencia de apnea del sueño no diagnosticada. El consumo de alcohol puede agravar el riesgo de tener accidentes de tráfico, especialmente en sujetos con déficit de sueño o apnea del sueño. Los pacientes con apnea del sueño no tratada incrementan por siete el riesgo de padecer accidentes de tráfico en comparación con los que no lo tienen<sup>1,4</sup>.

### **Sueño y trabajo**

El trabajo puede tener múltiples interacciones con el sueño: largas jornadas laborales, trabajos que incluyen viajes, trabajo a turnos o responsabilidades laborales han demostrado tener un impacto negativo tanto en la duración como en la calidad del sueño. Uno de los principales grupos de riesgo en la interacción entre sueño y trabajo son los trabajadores a turnos. Este grupo ha demostrado presentar más alteraciones del estado de ánimo; riesgo de depresión; tienen más riesgo de enfermedades cardiovasculares y metabólicas, como la intolerancia a la glucosa y diabetes; aumento del riesgo cáncer, y más obesidad<sup>1,4</sup>.

El trabajo a turnos se traduce en una falta crónica de sueño debido a que no se duermen suficientes horas durante el día, a menudo se produce un despertar precoz y hay dificultades para conciliar el sueño y cansancio durante el día. Por este motivo los trabajadores a turnos consumen más hipnóticos. El aumento del cansancio y somnolencia se relaciona con el aumento de la siniestralidad laboral y el incremento de accidentes de tráfico, siendo estos últimos más frecuentes en el desplazamiento al trabajo. El 10% de estos trabajadores no se adaptan a los cambios horarios y desarrollan el denominado trastorno por mala adaptación al trabajo a turnos (*shift work disorder*)<sup>4</sup>.

### **Trastornos del sueño**

Los trastornos del sueño son alteraciones prevalentes con una importante morbilidad y un impacto sobre la calidad de vida. Los trastornos del sueño más frecuentes son el insomnio, seguido por la apnea obstructiva del sueño (AOS). Los dos trastornos tienen un importante impacto socioeconómico y, como se ha revisado en otros capítulos de este consenso, hay una amplia evidencia de que el tratamiento de la AOS es coste-eficaz y reduce el uso de recursos sanitarios. Es necesario, por tanto, el conocimiento de la AOS y la implicación en el manejo del mismo de los profesionales sanitarios de todos los niveles, desde enfermería comunitaria hasta la especializada.

El insomnio se caracteriza por la dificultad de iniciar o mantener el sueño. Afecta al menos al 6-15 % de la población, aumenta con la edad y es más frecuente en mujeres. El insomnio supone un impacto negativo sobre la calidad de vida, disminuye la funcionalidad del individuo y tiene un importante impacto económico en términos de utilización de los recursos sanitarios y disminución de la productividad laboral. El Insomnio se ha relacionado con enfermedades crónicas como la hipertensión, diabetes,

dolor crónico, deterioro cognitivo y el cáncer. La terapia cognitivo-conductual del insomnio es actualmente el tratamiento más eficaz para el insomnio crónico y se considera el tratamiento de elección. La falta de conocimientos del personal sanitario sobre esta terapia hace que sea poco accesible, por lo que la mayoría de pacientes reciben tratamiento con fármacos que tienen una efectividad limitada y pueden tener efectos secundarios adversos, especialmente en gente mayor, así como riesgo de dependencia<sup>11</sup>. Dada su prevalencia, es necesario el conocimiento de esta entidad por todos los profesionales sanitarios desde enfermería, pasando por el médico de atención primaria, hasta la medicina especializada. En caso de detectarlo es necesario descartar causas secundarias como la depresión y aplicar medidas generales para su tratamiento.

## **Conclusiones**

Este DIC recomienda que todos los aspectos de sueño, salud y de la cronobiología en sí misma se incorporen de un modo rutinario en el manejo clínico de los pacientes y en las historias clínicas.

Este documento considera que las diversas sociedades científicas deberían enfatizar estos aspectos a las diversas autoridades sanitarias, especialmente el impacto de las horas de trabajo y turno de trabajo sobre la duración y calidad del sueño, y la asociación de la somnolencia con siniestralidad laboral y accidentes de tráfico.

La enfermería es el elemento clave para el manejo de los aspectos de sueño y salud, al igual que el seguimiento del tratamiento con presión positiva continua en las vías respiratorias y la presencia de diversas comorbilidades (obesidad, patología cardíaca, diabetes) o del estilo de vida (ejercicio, toma fármacos sedantes, etc.). Es de esperar que en un futuro la enfermería adquiera en este sentido mayores competencias o responsabilidades en el manejo de la AOS.

## BIBLIOGRAFÍA:

1. Mukherjee S, Patel PR, Kales SN, Ayas NT, Strohl KP, Gozal D, et al. An Official American Thoracic Society Statement: The importance of Healthy Sleep. *Am J Respir Crit Care Med* 2015;191(12):1450-8.
2. Watson NF, Badr MS, Belenky G, Bliwise DL, Buxton OM, Buysse D, et al. Joint Consensus Statement of the American Academy of Sleep Medicine and Sleep Research Society on the Recommended Amount of Sleep for a Healthy Adult: Methodology and Discussion. *J Clin Sleep Med* 2015;11(8):931-52.
3. Paruthi S, Brooks LJ, D'Ambrosio C, Hall WA, Kotagal S, Lloyd RM, et al. Consensus Statement of the American Academy of Sleep Medicine on the Recommended Amount of Sleep for Healthy Children: Methodology and Discussion. *J Clin Sleep Med* 2016;12(11):1549-61.
4. Merino-Andreu M, Álvarez-Ruiz de Larrinaga A, Madrid-Pérez JA, Martínez-Martínez MA, Puertas-Cuesta FJ, Asencio-Guerra AJ, et al. Sueño saludable: evidencias y guías de actuación. Documento oficial de la Sociedad Española de Sueño. *Neurol* 2016;63(Supl. 2):S1-S27.
5. Adolescent Sleep Working Group; Committee on Adolescence; Council on School Health. School start times for adolescents. *Pediatrics* 2014;134:642-9.
6. Dalmases M, Benítez ID, Mas A, García-Codina O, Medina-Bustos A, Escarrabill J, et al. Assessing sleep health in a European population: Results of the Catalan Health Survey 2015. *PLoS One* 2018;13(4):e0194495. doi: 10.1371/journal.pone.0194495.
7. Ford ES, Cunningham TJ, Croft JB. Trends in self-reported sleep duration among US adults from 1985 to 2012. *Sleep* 2015;38(5):829-32. doi: 10.5665/sleep.4684.
8. Buysse DJ. Sleep health: can we define it? Does it matter? *Sleep* 2014;37(1):9-17. doi: 10.5665/sleep.3298.
9. Benítez I, Roure N, Pinilla L, Sapiña-Beltran E, Buysse DJ et al. Validation of the Satisfaction, Alertness, Timing, Efficiency and Duration (SATED) Questionnaire for Sleep Health Measurement. *J. Ann Am Thorac Soc.* 2020 Mar;17(3):338-343. doi: 10.1513/AnnalsATS.201908-628OC.
10. Gonçalves M, Amici R, Lucas R, Akerstedt T, Cirignotta F, Horne J, et al; National Representatives as Study Collaborators. Sleepiness at the wheel across Europe: a survey of 19 countries. *J Sleep Res* 2015;24:242-53.
11. Morin CM, Benca R. Chronic insomnia. *Lancet* 2012;379(9821):1129-41. doi: 10.1016/S0140-6736(11)60750-2.
