# Supplementary material
Source: Elsevier journal article supplement (https://www.sciencedirect.com/science/article/pii/S0300289621001150)
Supplement: mmc16 [file S0300289621001150:mmc16.pdf]

### 5.3. Sueño: una enfermedad integral

**Editor:** Josep María Montserrat. Unidad Multidisciplinar de Patología del Sueño y VNID, Servei Pneumologia, Institut Clínic Respiratori, Hospital Clínic, Barcelona, España; Universidad de Barcelona, Barcelona, Centro de Investigación Biomédica en Red de Enfermedades Respiratorias (CIBERES), Madrid, España.

**M. Ángeles Sánchez-Quiroga.** Hospital Virgen del Puerto de Plasencia. CIBER de Enfermedades Respiratorias (CIBERES). ISCIII. Madrid. Instituto Universitario de Investigación Biosanitaria en Extremadura (INUBE). Cáceres.

### Resumen

La apnea obstructiva del sueño (AOS) se asocia frecuentemente a otras patologías, dando lugar a la multimorbilidad, lo cual obliga a un abordaje global y personalizado del paciente y a la multidisciplinariedad. Además, el tratamiento de la AOS no solo corrige los episodios respiratorios obstructivos, sino que puede suponer un mejor control de otras comorbilidades, como la hipertensión arterial, y viceversa.

### Consenso

Este DIC considera imprescindible que cualquier profesional que atienda a los pacientes con patología respiratoria de sueño tenga capacidad de diagnosticar y tratar aspectos básicos de otras patologías generales, como las cardiovasculares, metabólicas o cognitivas, así como patologías específicas en relación con el sueño, como la cronobiología, el insomnio o el síndrome de las piernas inquietas. Asimismo, sepa diagnosticar y remitir adecuadamente las patologías generales notorias o las poco frecuentes del sueño como la narcolepsia o las conductas anormales durante la fase REM del sueño.

Este documento recomienda que durante la educación y el entreno que se realizan a los sujetos para su adaptación al tratamiento con presión positiva continua en las vías respiratorias (CPAP) es totalmente imprescindible abordar aspectos generales de salud como el ejercicio, la dieta y el dormir las horas suficientes. Abordar únicamente los temas de CPAP durante la educación y el entreno no es en absoluto adecuado, pues estos aspectos generales mejoran los episodios respiratorios durante el sueño.

### El Sueño como una enfermedad integral.

La apnea obstructiva del sueño es una enfermedad crónica de alta prevalencia que además está frecuentemente asociada a otras patologías crónicas y prevalentes como la hipertensión, diabetes, obesidad, enfermedad cardiovascular o depresión. La coexistencia de dos o más condiciones crónicas se conoce como multimorbilidad y se relaciona con peor calidad de vida, mayor limitación funcional y mayor consumo de los

recursos sanitarios<sup>1</sup>, siendo los pacientes que la presentan subsidiarios de un manejo multidisciplinario y un enfoque de medicina de precisión.

Uno de los síntomas principales de la AOS es la excesiva somnolencia diurna (ESD). Sin embargo, existen numerosos factores que pueden causarla o agravarla, como el consumo de algunos fármacos, el insomnio, la coexistencia de otros trastornos del sueño o los trastornos del estado anímico. Estos últimos, como la ansiedad o la depresión, son muy prevalentes en la población general y en concreto entre los pacientes con AOS, y siempre debemos tenerlos presentes como posible causa de ESD. Además, se asocian a mala calidad de sueño, insomnio, tratamientos con depresores del sistema nervioso central, pudiendo agravar una AOS existente o sus síntomas.

Incluso pacientes con AOS que están tratados con CPAP pueden presentar una ESD residual que no responde al tratamiento y que es necesario evaluar en profundidad para intentar esclarecer sus causas. La falta de adherencia al tratamiento con CPAP es también una de ellas, además de un reto frecuente en la práctica clínica. Son muchos los problemas, molestias o efectos secundarios que los pacientes pueden presentar durante el tratamiento con CPAP. Una corrección temprana de éstos puede favorecer la adherencia a corto y largo plazo. En este sentido, las nuevas tecnologías, como los dispositivos de CPAP que recogen y transmiten las horas de uso, diversas apps y dispositivos portátiles, pueden ayudar al autocontrol y a estimular a los pacientes a llevar a cabo conductas de vida saludable y que se conviertan en gestores de su propia salud.

La obesidad es el factor de riesgo más importante en el desarrollo de la AOS y además incrementa la gravedad de esta. Las intervenciones para favorecer la pérdida de peso son cruciales en el manejo de estos pacientes, y conlleva educación sanitaria y cambios en el estilo de vida que se mantengan a largo plazo, favoreciendo una dieta equilibrada y el ejercicio físico. La cirugía es una opción en algunos pacientes seleccionados donde fallan las actuaciones anteriores. El abordaje de la obesidad no es para nada sencillo, por eso la colaboración multidisciplinaria es esencial.

El consumo de alcohol o tabaco no es reconocido como causa de la AOS, pero sí como factor agravante. La ingesta de alcohol, sobre todo las 2 horas previas a irse a dormir, aumenta el número de los episodios obstructivos durante el sueño, incluso tras una ingesta moderada<sup>2</sup>. El tabaco produce inflamación crónica de la mucosa nasofaríngea, disminuyendo su calibre y colapsabilidad durante el sueño, e incluso se ha descrito una asociación dosis-respuesta entre el consumo de tabaco y la presencia de trastornos respiratorios durante el sueño<sup>3</sup>. Sin embargo, hasta el día de hoy se encuentran resultados discrepantes entre los estudios que exploran esta asociación, por lo que la relación del tabaco con la AOS no está claramente definida<sup>4</sup>. Aun así, no podemos olvidar que el tabaco es causa o factor de riesgo para otras patologías que a menudo

podemos encontrar entre los pacientes con AOS, como la cardiopatía isquémica o la enfermedad obstructiva crónica, y está relacionado con uno de sus síntomas principales que es el ronquido. Identificar a los pacientes consumidores de estas sustancias, realizar intervenciones durante la entrevista clínica y facilitarles los recursos necesarios para el abandono del tabaco y la reducción o abandono del consumo de alcohol forman parte del abordaje cotidiano de los pacientes con AOS.

La AOS se asocia a un incremento del riesgo cardiovascular a través de múltiples vías fisiopatológicas potenciales (v. apartado “Apnea del sueño y sus consecuencias”). Es frecuente que la patología cardiovascular, así como la hipertensión, diabetes y dislipidemia, formen parte de la comorbilidad de nuestros pacientes con AOS. Aunque el tratamiento con CPAP prometía tener un efecto beneficioso en la prevención de episodios cardiovasculares y su mortalidad, hoy en día no ha sido demostrado<sup>5,6</sup>. Sin embargo, el control de los factores de riesgo cardiovasculares es el pilar fundamental en el abordaje de los pacientes con AOS. Además, no podemos olvidar que el tratamiento con CPAP ha demostrado reducir las cifras de tensión arterial<sup>7,8</sup> y que las medidas higiénico-dietéticas (pérdida de peso, abandono del hábito tabáquico, ejercicio físico) que forman parte del tratamiento de la AOS ayudan a controlar dichos factores.

Como podemos percibir, el manejo de un paciente con AOS no solo se basa en corregir o reducir los episodios obstructivos aplicando presión positiva en la vía aérea durante el sueño o dispositivos de avance mandibular. Son muchos los aspectos y problemas que debemos abarcar para dar una asistencia integral y exitosa (Tabla 1). La educación del paciente, fomentar la participación en su propio control y autocuidado, el uso de las nuevas tecnologías, cambios en el estilo de vida, abordaje psicológico y colaboración con otros especialistas, son parte de la red necesaria para ofrecer un abordaje global y personalizado centrado en el paciente y en el conjunto de su universo patológico.

**Tabla 1.** Resumen de la patología y problemas asociados a la a apnea obstructiva del sueño y su abordaje integral.

| Morbilidad asociada                              | Actuaciones potenciales                                                                                                                                                              |
|--------------------------------------------------|--------------------------------------------------------------------------------------------------------------------------------------------------------------------------------------|
| Enfermedad y factores de riesgo cardiovasculares | <ul style="list-style-type: none"> <li>• Búsqueda activa</li> <li>• Control: cambios del estilo de vida, tratamiento activo</li> <li>• Coordinación con atención primaria</li> </ul> |
| Obesidad                                         | <ul style="list-style-type: none"> <li>• Cambios del estilo de vida: dieta y programa de ejercicio físico personalizados</li> <li>• Valoración especializada si procede</li> </ul>   |

|                                                                                                                                                                             |                                                                                                                                                                                                                                                                                                                            |
|-----------------------------------------------------------------------------------------------------------------------------------------------------------------------------|----------------------------------------------------------------------------------------------------------------------------------------------------------------------------------------------------------------------------------------------------------------------------------------------------------------------------|
| Alcohol y tabaco                                                                                                                                                            | <ul style="list-style-type: none"> <li>• Identificar consumidores</li> <li>• Entrevista dirigida y motivacional</li> <li>• Tratamiento de deshabituación</li> <li>• Coordinación con atención primaria y unidades de deshabituación</li> <li>• Apoyo psicológico</li> </ul>                                                |
| Ámbito psicológico                                                                                                                                                          | <ul style="list-style-type: none"> <li>• Identificar la presencia de ansiedad y/o depresión</li> <li>• Coordinación con atención primaria y psicólogos/psiquiatras</li> </ul>                                                                                                                                              |
| ESD a pesar de tratamiento (CPAP/DAM)                                                                                                                                       | <ul style="list-style-type: none"> <li>• Valorar posibles causas: fármacos, patología orgánica, patología psicológica/psiquiátrica, otras patologías del sueño asociadas, insomnio, narcolepsia, SPI, malos hábitos o falta de sueño, problemas de adaptación al tratamiento y mal cumplimiento, ESD idiopática</li> </ul> |
| <p>CPAP: presión positiva continua en la vía respiratoria; DAM: dispositivo de avance mandibular; ESD: excesiva somnolencia diurna; SPI: síndrome de piernas inquietas.</p> |                                                                                                                                                                                                                                                                                                                            |

## Conclusiones

- La apnea obstructiva del sueño es una entidad muy común. En muchos casos va asociada a otras entidades como la obesidad, hipertensión arterial, diabetes y depresión, formando parte de lo que llamamos multimorbilidad.
- La somnolencia es uno de los síntomas más clásicos de la enfermedad, pero puede ser debido a otros factores o entidades. Dormir poco y mal es la causa más frecuente en la actualidad.
- Existe controversia en el efecto de la CPAP en la patología cardiovascular como secundaria a las apneas. Sin embargo, la CPAP estaría indicada para la hipertensión resistente, el ictus y la fibrilación auricular. No está tan claro en la diabetes severa o en sujetos con trastornos cognitivos.
- La CPAP como tratamiento de las apneas reduce las patologías asociadas y a la inversa. De ahí la necesidad de un tratamiento global.

- El adecuado cumplimiento del tratamiento con CPAP es fundamental para la obtención de beneficios clínicos. El uso de las nuevas tecnologías y las estrategias de autocuidado pueden ser herramientas muy útiles para conseguir este objetivo.

## BIBLIOGRAFÍA:

1. Xu X, Mishra GD, Jones M. Evidence on multimorbidity from definition to intervention: an overview of systematic reviews. *Ageing Res Rev* 2017;37:53-68. doi: [10.1016/j.arr.2017.05.003](https://doi.org/10.1016/j.arr.2017.05.003).
2. Al Lawati NM, Patel SR, Ayas NT. Epidemiology, risk factors, and consequences of obstructive sleep apnea and short sleep duration. *Prog Cardiovasc Dis* 2009;51(4):285e93. doi: [10.1016/j.pcad.2008.08.001](https://doi.org/10.1016/j.pcad.2008.08.001).
2. Scanlan MF, Roebuck T, Little PJ, Redman JR, Naughton MT. Effect of moderate alcohol upon obstructive sleep apnoea. *Eur Respir J* 2000;16(5):909e13.
3. Wetter DW, Young TB, Bidwell TR, Badr MS, Palta M. Smoking as a risk factor for sleep-disordered breathing. *Arch Intern Med* 1994;154(19): 2219-24. doi: [10.1001/archinte.1994.00420190121014](https://doi.org/10.1001/archinte.1994.00420190121014).
4. Taveira KVM, Kuntze MM, Berretta F, de Souza BDM, Godolfim LR, Demathe T, et al. Association between obstructive sleep apnea and alcohol, caffeine and tobacco: a meta-analysis. *J Oral Rehabil* 2018;45(11):890-902. doi: [10.1111/joor.12686](https://doi.org/10.1111/joor.12686).
5. McEvoy RD, Antic NA, Heeley E, Luo Y, Ou Q, Zhang X, et al. CPAP for prevention of cardiovascular events in obstructive sleep apnea. *N England J Med* 2016;375(10):919-31. doi: [10.1056/NEJMoa1606599](https://doi.org/10.1056/NEJMoa1606599).
6. Sánchez De La Torre M, Sánchez De La Torre A, Bertrán S, Abad J, Duran-Cantolla J, Cabriada V, et al. Effect of Sleep Apnea and Its Treatment in the Prognosis of Patients with Acute Coronary Syndrome: Isaacc Study. *Am J Respir Crit Care Med* 2019;199:A5607. doi: [10.1164/ajrccm-conference.2019.199.1\\_MeetingAbstracts.A5607](https://doi.org/10.1164/ajrccm-conference.2019.199.1_MeetingAbstracts.A5607).
7. Barbe F, Duran-Cantolla J, Capote F, de la Peña M, Chiner E, Masa JF, et al. Long-term effect of continuous positive airway pressure in hypertensive patients with sleep apnea. *Am J Respir Crit Care Med* 2010;181(7):718-26. doi: [10.1164/rccm.200901-0050OC](https://doi.org/10.1164/rccm.200901-0050OC).
8. Sapiña-Beltran E, Torres G, Benítez I, Santamaría-Martos F, Durán-Cantolla J, Egea C, et al. Differential blood pressure response to continuous positive airway pressure treatment according to the circadian pattern in hypertensive patients with obstructive sleep apnoea. *Eur Respir J* 2019; 54(1): 1900098; DOI: [10.1183/13993003.00098-2019](https://doi.org/10.1183/13993003.00098-2019).
