# Supplementary material
Source: Elsevier journal article supplement (https://www.sciencedirect.com/science/article/pii/S0300289621001150)
Supplement: mmc17 [file S0300289621001150:mmc17.pdf]

## 5.4. Medicina de precisión

**Editor:** Josep María Montserrat. Unidad Multidisciplinar de Patología del Sueño y VNID, Servei Pneumologia, Institut Clínic Respiratori, Hospital Clínic, Barcelona, España; Universidad de Barcelona, Barcelona, Centro de Investigación Biomédica en Red de Enfermedades Respiratorias (CIBERES), Madrid, España.

**Neus Salord Oleo.** Facultativo especialista. Unidad de trastornos respiratorios del sueño. Servicio de Neumología. Hospital Universitario de Bellvitge. Barcelona. Instituto de Investigación Biomédica de Bellvitge de Bellvitge (IDIBELL). Barcelona. Ciber enfermedades respiratorias. CIBERES.

### Resumen

La medicina de precisión se define como la medicina basada en actuaciones o tratamientos aplicados en función de las necesidades individuales de los pacientes con base en sus características genéticas, el perfil de biomarcadores, las características fenotípicas o psicosociales que distinguen a un paciente de otros con presentaciones clínicas similares. El conocimiento de la enfermedad, su fisiopatología (básica) y de las manifestaciones y comorbilidades a las que se asocia (clínica) conlleva una toma adecuada de decisiones terapéuticas. De esta manera, el conocimiento se transfiere al sistema sanitario, todo ello bajo el concepto de coste-efectividad, utilizando nuevos instrumentos, tecnología y procesos que permiten su aplicación a la práctica asistencial real (administración). En este sentido y de un modo muy simple, hay que entender la medicina de precisión como la que debe llevar a cabo rutinariamente un buen profesional óptimamente preparado.

### Manuscrito

La medicina de precisión se define como la medicina basada en actuaciones o tratamientos aplicados en función de las necesidades individuales de los pacientes según sus características genéticas, el perfil de biomarcadores, las características fenotípicas o psicosociales que distinguen a un paciente de otros con presentaciones clínicas similares<sup>1</sup>. El objetivo de la medicina de precisión es la de mejorar la respuesta clínica de un determinado paciente, minimizando los efectos secundarios innecesarios para aquellos pacientes menos propensos a responder a un tratamiento particular. Por tanto, las intervenciones preventivas o terapéuticas se pueden concentrar en aquellos pacientes que se beneficiarán, ahorrando gastos y efectos secundarios para los que no lo harán. La convergencia de la genética, la informática y las técnicas diagnósticas convencionales, junto con otras tecnologías de clasificación celular (epigenética, proteómica y metabolómica), está expandiendo rápidamente el alcance de la medicina de precisión, refinando la clasificación de la enfermedad, mejorando su capacidad predictiva y por tanto mejorando el pronóstico y la respuesta al tratamiento<sup>1</sup>.

La mayoría de las enfermedades son el resultado de múltiples interacciones genéticas y ambientales entrelazadas en un sistema biológico de redes. En este contexto, un exosoma se define como el conjunto de las exposiciones individuales con las que el sujeto se encuentra a lo largo de su vida, mientras que su genoma es la base de material genético que determina a cada sujeto. Estas interacciones van a activar una serie de mecanismos moleculares que darán lugar a un subtipo de enfermedad o endotipo que se manifestará como un fenotipo clínico. Los endotipos y fenotipos pueden ser detectados por biomarcadores validados, que son indicadores medibles que sirven para evaluar un proceso biológico o patogénico particular, su morbilidad o incluso la respuesta al tratamiento<sup>2</sup>.

La apnea obstructiva del sueño (AOS) es una enfermedad heterogénea, compleja y prevalente. Aunque se considera la presión positiva continua en la vía aérea (CPAP) un tratamiento coste-eficaz en la AOS grave, sus resultados en pacientes con enfermedad cardiovascular establecida han sido cuestionados recientemente. A pesar de su variabilidad, el diagnóstico y clasificación de la AOS se ha basado hasta el momento en pocas medidas clínicas como el índice de apnea-hipopnea (IAH) y la clínica (sobre todo la somnolencia). Sin embargo, estos indicadores no han demostrado ser buenos predictores de su morbilidad, ni describen la heterogeneidad de la enfermedad, por lo que actualmente se cuestiona su uso como principal criterio diagnóstico o pronóstico<sup>2</sup>.

Recientemente se han descrito diferentes fenotipos fisiopatológicos y clínicos que nos han permitido tipificar y clasificar mejor esta enfermedad, dando el primer paso para el desarrollo y la aplicación de una medicina de precisión. El desarrollo de los fenotipos basados en rasgos fisiopatológicos (endotipos), factores anatómicos y no anatómicos (colapsabilidad de la vía aérea, la capacidad de respuesta muscular, bajo umbral de despertar y *loop gain* elevado) ha permitido desarrollar nuevas estrategias de tratamiento personalizadas y prometedoras, más allá de la CPAP. Estas estrategias se encuentran actualmente en fase de estandarización y validación<sup>3</sup>. También se han desarrollado fenotipos polisomnográficos basados en diferentes características como la posición, la AOS de predominio en fase de sueño REM o combinaciones de variables polisomnográficas que han demostrado tener implicaciones en la respuesta al tratamiento y el riesgo y la morbilidad cardiovascular asociada a la AOS<sup>4</sup>. La descripción de fenotipos basados en datos clínicos ha permitido clasificar a los pacientes con diferentes patrones de síntomas: *sueño alterado*, *mínimamente sintomáticos*, *excesivamente somnolientos* y *moderadamente somnolientos*. Estos hallazgos concordantes en diferentes estudios clínicos y de cohortes han demostrado que incluso el fenotipo de paciente sintomático puede ser un marcador de riesgo cardiovascular y de adherencia al tratamiento con CPAP<sup>5,6</sup>.

El reto al que nos enfrentamos actualmente es el hecho de validar de forma prospectiva los fenotipos hallados, incluyendo pacientes normalmente excluidos de estos estudios como gente mayor, mujeres, pacientes con diferentes comorbilidades con y sin obesidad. Será importante vincular a los fenotipos con objetivos longitudinales diferentes a la corrección del IAH, como por ejemplo la presión arterial o el rendimiento neurocognitivo. Una mayor identificación de estos subgrupos permitirá planear nuevos tratamientos más personalizados. Una vez hallados, será prioritario evaluar la eficacia, seguridad y rentabilidad de la aplicación de las terapias disponibles encaminadas a

tratar cada rasgo o fenotipo concreto de cara a poder establecer un nuevo paradigma para el manejo del SAHS en cada nivel asistencial.

Paralelamente a los fenotipos, disponemos ya de las primeras herramientas basadas en la aplicación de las nuevas ciencias ómicas. La aplicación de la biología de sistemas a los estudios genéticos de la AOS y los estudios sobre el transcriptoma de grasa visceral han dado los primeros pasos para evaluar la base molecular de la interacción entre la AOS, la obesidad y las alteraciones metabólicas<sup>7</sup>. El estudio de patrones microARN circulantes nos ha permitido predecir la respuesta de la hipertensión resistente frente al tratamiento con CPAP<sup>8-9</sup>. Estudios proteómicos están dando resultados prometedores de cara a diferenciar pacientes susceptibles a determinadas comorbilidades<sup>7</sup>. Sin embargo, pese a los resultados prometedores de estas nuevas técnicas, queda aún por determinar su papel exacto como herramientas predictivas y diagnósticas, así como simplificar su uso para que puedan generalizarse de una forma coste-efectiva. Por lo que a día de hoy, no podemos recomendar aún marcadores útiles a implementar en la práctica clínica diaria.

Sin embargo, en un sentido más amplio, la aplicación de la medicina de precisión también es la que lleva a cabo rutinariamente un profesional óptimamente preparado. El conocimiento de la enfermedad, su fisiopatología (básica) y de las manifestaciones y comorbilidades a las que se asocia (clínica) conlleva una toma adecuada de decisiones terapéuticas. De esta manera, el conocimiento se transfiere al sistema sanitario, todo ello bajo el concepto de coste-efectividad, utilizando nuevos instrumentos, tecnología y procesos que permiten su aplicación a la práctica asistencial real (administración).

El diagnóstico personalizado incluye de forma inherente proporcionar de una forma rápida y eficaz las herramientas necesarias para el diagnóstico de una enfermedad tan prevalente. Por este motivo se ha demostrado que las poblaciones de riesgo alto e intermedio de AOS pueden ser identificadas con sistemas diagnósticos simplificados o, incluso, en manos de la medicina primaria<sup>10,11</sup>, dejando la técnica de referencia, la polisomnografía, para casos más complejos, que podrán ser manejados en las unidades de sueño especializadas como casos de AOS complejos, VMI, AOS con insomnio notorio o con sospecha de otras enfermedades neurológicas<sup>12</sup>. En los casos con patologías crónicas graves pero estables el diagnóstico puede hacerse con poligrafía respiratoria en el domicilio. Respecto al tratamiento de la AOS, este DIC (ver capítulo correspondiente) recomienda con la evidencia existente que el tratamiento debe basarse en los síntomas y la patología secundaria como hipertensión resistente, fibrilación auricular e ictus; hay que considerar aspectos cognitivos y metabólicos moderado-graves. Aunque en los casos de AOS grave el tratamiento inicial debe ser la CPAP, esta debe ir acompañada de medidas generales como el ejercicio, el tratamiento de la obesidad si existe y recomendaciones para un sueño saludable. El tratamiento postural es una opción en los sujetos con un número alto de apnea en supino. Asimismo, desde el punto de vista de la medicina de precisión el tratamiento debe elegirse teniendo en cuenta el estilo de vida del paciente, valorando no solo el tratamiento con CPAP, sino también el tratamiento postural, dispositivos de avance mandibular (DAM), cirugía de vías aéreas superiores (VAS) e incluso bariátrica, siendo la cirugía de estimulación del geniogloso una opción más reciente<sup>3</sup>. El seguimiento personalizado del paciente con AOS dependerá de las características del paciente, su adaptación y el cumplimiento del tratamiento. El seguimiento de casos sencillos y con buena respuesta tras 3-6 meses

de control hospitalario podría ser derivado de nuevo a la medicina primaria con el apoyo de la empresa suministradora de la terapia. Los pacientes mal cumplidores o con patología más compleja, por el contrario, seguirían bajo control hospitalario, todo ello en función de los protocolos de cada centro sanitario o comunidad<sup>12</sup>.

## Conclusiones

Desde el punto de vista de la medicina de precisión:

¿Cuáles son los principales aspectos clínicos que determinan el proceso clínico de diagnóstico y gestión?

- Este DIC recomienda que en todo paciente con una alta probabilidad pretest de padecer apneas durante el sueño el procedimiento diagnóstico siempre debería de ser una poligrafía simplificada en el domicilio. La somnolencia es un síntoma también a considerar, pero en muchos casos puede ser inespecífica.
- En casos con AOS complejas, por ejemplo, centrales, sujetos con VNI o en aquellos con insomnio notorio, entre otras patologías complejas o en casos de sospecha de patología neurológica el diagnóstico requiere una polisomnografía convencional.
- En los casos con patologías crónicas, aunque notorias pero estables, el diagnóstico puede hacerse con poligrafía respiratoria en el domicilio.

¿Cuáles son los principales factores clínicos que determinan la indicación de tratamiento?

- Este DIC recomienda que el tratamiento debe de basarse en los síntomas y la patología secundaria como hipertensión resistente, fibrilación auricular e ictus. Hay que considerar aspectos cognitivos y metabólicos moderado-graves.
- Este DIC recomienda que el tratamiento no es siempre CPAP y debe elegirse en función del estilo de vida del paciente. Deben valorarse el tratamiento postural, DAM, cirugía de la VAS e incluso la cirugía bariátrica. Obviamente en los casos con AOS grave el tratamiento inicial siempre debe ser la CPAP acompañada de medidas generales como: ejercicio, tratamiento de la obesidad si existe y consejos para un sueño saludable. En los casos dudosos puede considerarse una prueba terapéutica.

¿Cuáles son los principales factores clínicos que determinan el tipo de seguimiento?

- Depende de las características del paciente, su adaptación y el cumplimiento del tratamiento. Tres aspectos a considerar: seguimiento hospitalario (sujetos difíciles con problemas), extrahospitalario (trabajo en red) (sujetos con muy buena evolución) o mediante las nuevas tecnologías (distancias, permisos laborales, dificultades de desplazamiento). Todo ello en función de los protocolos de cada centro sanitario o comunidad.

¿Qué marcadores biológicos son útiles en la práctica diaria?

- No existen marcadores útiles a implementar en la clínica.

## BIBLIOGRAFÍA:

1. Jameson JL, Longo DL. Precision medicine-personalized, problematic, and promising. *N Engl J Med* 2015;372:2229-34. doi: 10.1056/NEJMSb1503104.
2. Martínez-García MA, Campos-Rodríguez F, Barbé F, Gozal D, Agustí A. Precision medicine in obstructive sleep apnoea. *Lancet Respir Med* 2019;7(5):456-64. doi: 10.1016/S2213-2600(19)30044-X.
3. Eckert DJ. Phenotypic approaches to obstructive sleep apnea- New pathways for targeted therapy. *Sleep Medicine Reviews* 2016;37:45-59. doi: 10.1016/j.smrv.2016.12.003.
4. Zynchuk AV, Genctry MJ, Contacto J, Yaggi HK. Phenotypes in obstructive sleep apnea: A definition, examples, evolution and approaches. *Sleep Med Rev* 2017;35:113-23. doi: 10.1016/j.smrv.2016.10.002.
5. Zynchuk A, Yaggi HK. Sleep Apnea Heterogeneity, Phenotypes, and Cardiovascular Risk. Implications for Trial Design and Precision Sleep Medicine. *Am J Respir Crit Care Med* 2019;200(4):412-3. doi: 10.1164/rccm.201903-0545ED.
6. Zinchuk A, Yaggi HK. Phenotypic Subtypes of OSA: A Challenge and Opportunity for Precision Medicine. *Chest*. 2020;157(2):403-420. doi: 10.1016/j.chest.2019.09.002.
7. Khalyfa A, Gileles-Hillel A, Gozal D. The Challenges of Precision Medicine in Obstructive Sleep Apnea. *Sleep Med Clin* 2016;11(2):213-26. doi: 10.1016/j.jsmc.2016.01.003.
8. Sanchez-de-la-Torre M, Khalyfa A, Sanchez-de-la-Torre A, Martinez-Alonso M, Martinez-García MA, Barceló A, et al. Precision medicine in patients with resistant hypertension and obstructive sleep apnea: blood pressure response to continuous positive airway pressure treatment. *J Am Coll Cardiol* 2015;66:1023e32.
9. Pinilla L, Barbé F, de Gonzalo-Calvo D. MicroRNAs to guide medical decision-making in obstructive sleep apnea: A review. *Sleep Med Rev* 2021 Jan 22;59:101458. doi: 10.1016/j.smrv.2021.101458.
10. Chai-Coetzer CL, Antic NA, Rowland LS, Catcheside PG, Esterman A, Reed RL, et al. A simplified model of screening questionnaire and home monitoring for obstructive sleep apnoea in primary care. *Thorax* 2011;66(3):213-9. doi: 10.1136/thx.2010.152801. 21252389.
11. Sánchez-Quiroga MA, Corral J, Gómez-de-Terreros FJ, Carmona-Bernal C, Asensio-Cruz MI, Cabello M, et al. Primary Care Physicians Can Comprehensively Manage Sleep Apnea Patients: A Non-inferiority Randomized Controlled Trial. *Am J Respir Crit Care Med* 2018. doi: 10.1164/rccm.201710-2061OC. [E]
12. Suarez-Giron M, Bonsignore MR, Montserrat JM. New organisation for follow-up and assessment of treatment efficacy in sleep apnoea. *Eur Respir Rev*. 2019; 11;28(153). pii: 190059. doi: 10.1183/16000617.0059-2019.
