# Supplementary material
Source: Elsevier journal article supplement (https://www.sciencedirect.com/science/article/pii/S0300289621001150)
Supplement: mmc19 [file S0300289621001150:mmc19.pdf]

## 6.2. Niveles asistenciales

**Editor:** Josep María Montserrat. Unidad Multidisciplinar de Patología del Sueño y VNID, Servei Pneumologia, Institut Clínic Respiratori, Hospital Clínic, Barcelona, España; Universidad de Barcelona, Barcelona, Centro de Investigación Biomédica en Red de Enfermedades Respiratorias (CIBERES), Madrid, España.

**María José Masdeu Margalef.** Unidad Multidisciplinar del Sueño. Parc Taulí Hospital Universitari. Institut d'Investigació i Innovació Parc Taulí. Universitat Autònoma de Barcelona. Sabadell. Barcelona. Centro de Investigación Biomédica en Red de Enfermedades Respiratorias (CIBERES). Madrid.

### Resumen

La cronicidad del síndrome de la Apnea Obstruktiva del Sueño (AOS) y su coexistencia con otras patologías requiere fomentar el trabajo en equipos interdisciplinarios formados por los diferentes profesionales de los servicios sanitarios y sociales. Esto obliga a las unidades de sueño a redimensionar su actividad definiendo un plan estratégico de atención del proceso adaptándolo a cada entorno. El objetivo final sería diseñar una unidad asistencial del sueño entendida como una plataforma colaborativa entre diferentes niveles asistenciales u organización en red.

### Niveles asistenciales<sup>1-5</sup>

La mayoría de los sistemas sanitarios y sus estructuras están centrados fundamentalmente en la atención individual a los procesos agudos de la enfermedad, prestada de forma reactiva y fragmentada, desde un enfoque casi exclusivamente biomédico. Esta organización de los servicios de salud favorece la atención de patologías agudas, de forma episódica con un enfoque curativo, y valorando poco los aspectos preventivos, la perspectiva de los cuidados y la responsabilidad de las personas sobre los mismos. A su vez, la falta de coordinación entre niveles de atención sanitaria (atención primaria y especializada) y entre el sistema sanitario y el sistema social conlleva ineficiencia en la provisión, en el desarrollo y en la gestión de los recursos disponibles, lo que conduce a que los servicios sanitarios no se presten en el nivel más adecuado ni por el profesional más idóneo. Además, el aumento de la esperanza de vida junto con la evolución de las condiciones de vida y de trabajo y del medio ambiente físico y social han producido un incremento progresivo de la prevalencia de patologías crónicas y de situaciones de multimorbilidad, especialmente en los estratos de edad más avanzada de la población. Es por todo esto que las organizaciones sanitarias deben reformular la provisión de los servicios sanitarios y sociales a personas con enfermedades crónicas, entendiendo que el abordaje de la cronicidad requiere fomentar el trabajo en equipos interdisciplinarios formados por los diferentes profesionales de los servicios sanitarios y sociales implicados en la atención a estos pacientes que

garanticen la continuidad en los cuidados con la máxima participación del paciente y de su entorno.

Este marco general se puede aplicar a las unidades de sueño, las cuales se ven forzadas en la actualidad a su redimensión por elementos como la cronicidad de la enfermedad, su coexistencia con comorbilidades con las que comparte factores de riesgo, la concienciación de su impacto en la salud y la irrupción de las nuevas tecnologías en unas unidades ya de por sí muy sustentadas en dispositivos electrónicos. El diseño de la atención realizada en las unidades de sueño pasa por definir un **plan estratégico global** en la atención del proceso de la AOS, el cual deberá adaptarse a la realidad de cada entorno. La **unidad asistencial del sueño** debería concebirse como una organización de profesionales sanitarios de diferentes especialidades y de diferentes ámbitos que ofrece asistencia multidisciplinaria que cumple unos requisitos funcionales, estructurales y organizativos, de forma que garantiza las condiciones de seguridad, calidad y eficiencia adecuadas para atender al paciente con trastornos del sueño que requieran asistencia especializada. Esta concepción global e integradora sería un paso más allá en la división de las unidades de sueño en niveles asistenciales según la complejidad de los pacientes y del equipamiento (unidad multidisciplinaria de alta complejidad, unidad respiratoria y unidad básica).

La idea sería visualizar la unidad de sueño como una **“organización en red”** formada por estructuras de los diferentes niveles asistenciales implicados en la gestión del proceso asistencial de la AOS, con funciones perfectamente definidas para cada una de ellas e interconectados gracias a las nuevas tecnologías<sup>6</sup>, lo que permitiría mantener la **continuidad asistencial** (Figura 1).

**Figura 1.** Unidad asistencial del sueño. Organización en red.

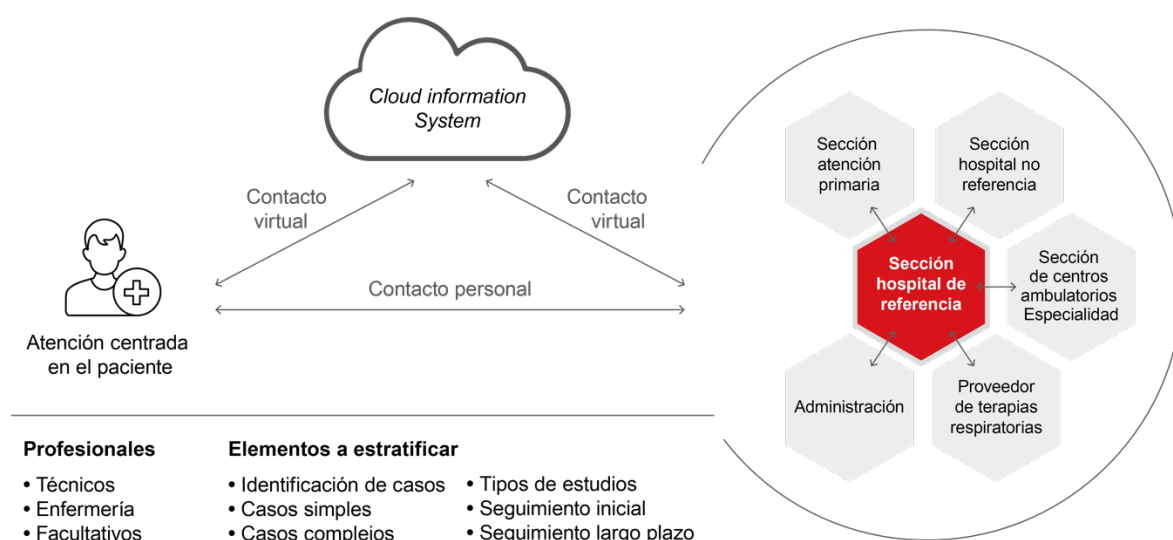

Se considera que las personas, tanto en su esfera individual como social, son el centro del Sistema Nacional de Salud y que los profesionales sanitarios deben compartir con toda la ciudadanía la responsabilidad en los cuidados de salud y en la utilización adecuada de los servicios sanitarios y sociales, garantizando así la continuidad asistencial. Esto solo será posible desde una organización con estructuras en red interconectadas. Se establece así una planificación colaborativa en la que se suman los pacientes, el equipo sanitario y otros proveedores de salud y la administración, conformando todos ellos una **plataforma colaborativa** (Figura 1).

Gestionar una patología crónica (AOS) como un proceso asistencial obliga a definir los diferentes proveedores de la atención sanitaria de ese proceso y las diferentes actividades a realizar por cada uno de ellos (estrategias preventivas, pruebas diagnósticas y actividades terapéuticas). Esta gestión como proceso lleva implícita la reordenación de los flujos de trabajo, de forma que aporten valor añadido y dirigido a incrementar el nivel de salud, la satisfacción del cliente/paciente y a facilitar las tareas de los profesionales. Un proceso asistencial debe tener una misión claramente definible (qué, para qué y para quién), unas fronteras delimitadas con entradas y salidas concretas, secuencias de etapas claramente integrables y debe poder medirse (cantidad, calidad, coste). Estos son los elementos que en los sucesivos años deberíamos ir definiendo en el proceso asistencial de la AOS.

**Unidad asistencial del sueño** = visualizada como una plataforma colaborativa entre diferentes profesionales (multidisciplinariedad) estratificados en diferentes niveles asistenciales y con funciones específicas, todas ellas enfocadas a la gestión de la AOS como un proceso crónico y con continuidad asistencial en el tiempo (Figura 1).

**Proceso AOS** = conjunto de actividades interrelacionadas que aporten valor. Concretamente, definir los roles y las actuaciones de cada profesional y de cada nivel asistencial que conformarían esta unidad multidisciplinaria/plataforma colaborativa de sueño que pasaría por estratificar el riesgo de la población respecto al proceso AOS, diseñando así intervenciones proactivas de más o menos intensidad en cada uno de los niveles (Figura 2). Probablemente la AOS pueda incluirse en un futuro en el grupo de patologías “impactables” como la EPOC y diabetes, es decir, que las actividades preventivas y de autocuidado implementadas puedan influir positivamente en la salud de la población.

**Figura 2.** Modelo poblacional de Kaiser permanente. Estratificación del riesgo poblacional para la AOS

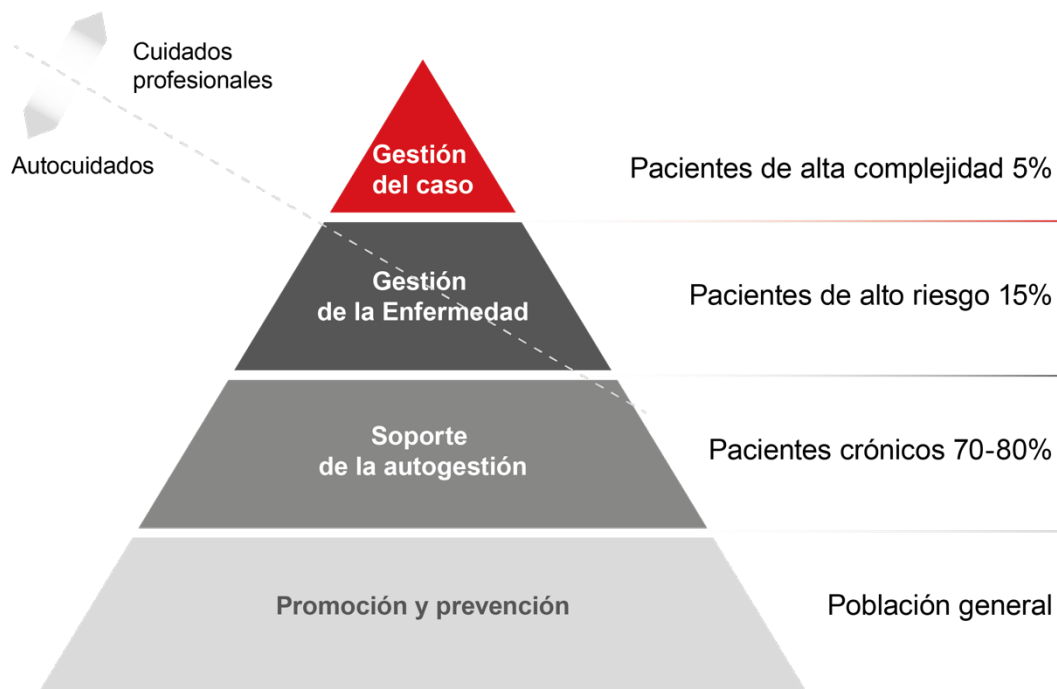

Es evidente que el modelo clásico de atención de la AOS es *time consuming* y fragmentado con los pacientes moviéndose entre un especialista y otro. En sanidad, el *team-based approach* es cada vez más recomendado, especialmente en aquellos procesos en que su proceso diagnóstico y de manejo suponen un reto, con objetivo de asegurar calidad asistencial, acceso adecuado al recurso sanitario y coste-efectividad.

### Puntos clave

- Multidisciplinariedad entendida por equipo de profesionales sanitarios de diferentes especialidades y diferentes niveles asistenciales, así como equipo de la empresa proveedora de terapias respiratorias y la administración.
- Plataforma asistencial colaborativa. Niveles asistenciales basados en la estratificación del riesgo de padecer la enfermedad. La estratificación debe permitir distribuir los recursos humanos y técnicos en cada nivel, entendiendo que los pacientes más complejos deben ser atendidos en la sección hospital y los pacientes sin comorbilidades o con ellas, pero en fase estable, pueden ser atendidos en los otros niveles. Se distribuyen los recursos humanos y de tecnología acorde con el tipo de pacientes que se atenderá en cada nivel. Esto permite racionalizar los flujos de pacientes.
- Organización asistencial en red. Trabajo en red de profesionales interconectados con plataformas tecnológicas. La tecnología avanzada como Cloud-computing Systems debe permitir la conexión entre los diferentes elementos de la red asistencial.

- Continuidad asistencial.
- Adaptar y rediseñar el modelo a cada entorno, a cada territorio.
- Reducir largas listas de espera para el diagnóstico y para el tratamiento.
- Plantear un plan integral de tratamiento consensuado entre especialistas y no plantear diferentes planes terapéuticos aislados, especialmente en los casos complejos.

## Conclusiones

Para evaluar los puntos citados es imprescindible tener en cuenta y desarrollar una serie de objetivos concretos a incorporar progresivamente:

- Remitir a medicina primaria, médico/enfermera, los pacientes que cumplen adecuadamente.
- Creación de plataformas o circuitos de interrelación de los diferentes niveles asistenciales.
- Creación de historias clínicas básicas a compartir que incluyan síntomas de la AOS con diagnóstico diferencial de otras enfermedades del sueño y generales, conceptos de sueño y una exploración clínica consensuada (total no más de 20-25 ítems), idealmente telemáticas con no más de 20-30 ítems, incluyendo obviamente una exploración general y de vías aéreas superiores (ORL, maxilo) con la idea de cómo y cuándo remitir.
- Creación de plantillas de derivación en ambos sentidos, idealmente telemáticas.

## BIBLIOGRAFÍA:

1. Freedman N. Doing It Better for Less: Incorporating OSA Management Into Alternative Payment Models. *Chest* 2019;155:227-33. Disponible en: <https://doi.org/10.1016/j.chest.2018.06.033>.
2. Garland-Baird L, Fraser K. Conceptualization of the Chronic Care Model: Implications for Home Care Case Manager Practice. *Home Healthcare Now* 2018;36(6):379-85. Disponible en: <https://doi.org/10.1097/NHH.0000000000000699>.
3. Krucien N, Le Vaillant M, Pelletier-Fleury N. What are the patients' preferences for the Chronic Care Model? An application to the obstructive sleep apnoea syndrome. *Heal Expect* 2015;18:2536-48. Disponible en: <https://doi.org/10.1111/hex.12222>.
4. Lin JS, Evans CV, Grossman DC, Tseng CW, Krist AH. Framework for Using Risk Stratification to Improve Clinical Preventive Service Guidelines. *Am J Prev Med* 2018;54:S26-37. Disponible en: <https://doi.org/10.1016/j.amepre.2017.07.023>.
5. Shelgikar AV, Durmer JS, Joynt KE, Olson EJ, Riney H, Valentine P. Multidisciplinary sleep centers: Strategies to improve care of sleep disorders patients. *J Clin Sleep Med* 2014;10:693-7. Disponible en: <https://doi.org/10.5664/jcsm.3808>.
6. Aji M, Gordon C, Stratton E, Calvo RA, Bartlett D, Grunstein R, et al. A Framework for the Design Engineering and Clinical Implementation and Evaluation of mHealth apps for Sleep Disturbance: A Systematic Review (Preprint). *J Med Internet Res* 2021;23(2):e24607. Disponible en: doi: 10.2196/24607
